# Supplementary material for: Exploring telerehabilitation awareness, application, and future outlook in sports rehabilitation among physiotherapy students: a web-based survey
Source: PeerJ. 2025 Aug 26;13:e19829. doi: 10.7717/peerj.19829 (PMC12396206; doi:10.7717/peerj.19829)
Supplement: Supplemental Information 2 — The raw measurement data collected during the study, including individual participant responses, awareness scores, application knowledge scores, and future outlook scores. This dataset ensures transparency and allows for reproducibility of the findings. [file peerj-13-19829-s002.xlsx]

## Sheet: Sheet1
ID	GENDER	AGE	COURSE	YEAR	REGION	Inside or Outside India	Q1: Are you familiar with the term "telerehabilitation" and its applications, such as video calls, mobile apps, and software tools for rehabilitation purposes?	Q2: If yes, where did you first come across the term "telerehabilitation"?	Q3: If not, why are you not familiar with the term "telerehabilitation"?	Q4: Have you received any formal education on telerehabilitation as part of your curriculum?	Q5: Would you be interested in receiving education or training about telerehabilitation techniques as part of your physiotherapy curriculum?	Q6: If "yes," what specific aspects of telerehabilitation education would you find most valuable?	Q7: If "no," what factors contribute to your lack of interest in receiving telerehabilitation education as part of your sports study’s curriculum?	Q8:I can differentiate between real-time and store-and-forward telerehabilitation approaches.	Q9: I can distinguish between telerehabilitation and telemedicine and understand their unique uses.	Q10: I can identify the common types of sports injuries that are suitable for telerehabilitation.	Q11: I am aware of the potential role of telerehabilitation in post-operative rehabilitation.	Q12: I am aware of any professional certification or specialization programs related to telerehabilitation for physiotherapists.	Q13: The level of support and resources available for students interested in telerehabilitation in physiotherapy program is adequate.	Q14: I believe that hands-on physiotherapy techniques are essential for effective sports rehabilitation, making telerehabilitation less suitable.	Q15: Formal education in telerehabilitation would increase my willingness to use it for sports rehabilitation.	Q16: I am aware of any ongoing research or innovations in the field of telerehabilitation for sports rehabilitation.	Q17: I perceive telerehabilitation as an environmentally friendly alternative to traditional in-person rehabilitation methods.	Q18: I am aware of the ethical considerations and guidelines associated with telerehabilitation in sports rehabilitation.	Q19: Offering telerehabilitation as a treatment option has the potential to reduce the overall cost of sports rehabilitation for athletes and organizations.	Q20: The availability of resources, including technology, affects the effectiveness of telerehabilitation in sports rehabilitation.	Q21: I think that telerehabilitation has the potential to bridge geographical gaps in providing care to athletes, enabling remote areas to access high-quality physiotherapy services.	Q22: I believe effective communication with athletes and motivation for adherence to their rehabilitation programs is assured in telerehabilitation.	Q23: I believe that telerehabilitation could be integrated with virtual reality to create more engaging and interactive rehabilitation experiences for athletes.	Q24: I believe Telerehabilitation achieve the same outcomes as in-person rehabilitation.	Q25: I believe that athletes benefit from quicker access to telerehabilitation services for their sports injuries.	Q26: I believe that tele-rehabilitation could contribute to a more sustainable approach to sports rehabilitation by reducing the need for travel and physical resources.	Q27: I'm open to considering telerehabilitation as a way to improve access to sports rehabilitation expertise for amateur athletes and those in underprivileged communities.	Q28: I believe that ongoing research and evidence-based practice are essential for the successful implementation of telerehabilitation in sports rehabilitation.	Q29: Establishing a specialized field for telerehabilitation within the discipline is something that can be considered.	Q30: I think telerehabilitation can help in tracking and monitoring an athlete's progress during the rehabilitation process?	Q31: I agree that telerehabilitation can play a significant role in reducing the recovery time for athletes with sports injuries.	Q32: I am willing to invest time and effort to stay updated on the latest advancements in telerehabilitation techniques.	Q33: I think that telerehabilitation will become a standard practice in the field of sports rehabilitation.	Q34: I believe that integrating telerehabilitation into the curriculum of physiotherapy programs is essential for future professionals.	Q35: I am confident that telerehabilitation will continue to gain acceptance and recognition within the healthcare industry for sports rehabilitation.	Q36: I believe that telerehabilitation will continue to evolve and address the challenges and limitations associated with sports rehabilitation.	Q37: I believe that telerehabilitation could be used to create personalized, AI-guided warm-up and cool-down routines for athletes.	Q38: I believe that telerehabilitation could employ elements of neurofeedback to enhance an athlete's mental resilience during recovery.	Q39: Your level of awareness regarding regulatory or legal aspects of telerehabilitation can impact your readiness to integrate it into your sports rehabilitation practice.	Q40: I believe that telerehabilitation will encourage athletes to take a more active role in their rehabilitation and recovery.	Q41: I agree that technical issues, such as poor internet connectivity, can hinder the effectiveness of telerehabilitation.	Q42: I agree that difficulty in accurately assessing the progress of athletes during telerehabilitation is a challenge.
1	Female	18-20	UG	3rd Year	South India	INSIDE INDIA	Yes	Academic courses		No	Yes	Patient assessment and monitoring through telehealth		Neutral	Strongly Agree	Strongly Agree	Strongly Agree	Neutral	Strongly Agree	Strongly Agree	Strongly Agree	Neutral	Strongly Agree	Strongly Agree	Strongly Agree	Strongly Agree	Strongly Disagree	Strongly Agree	Strongly Disagree	Strongly Agree	Strongly Agree	Strongly Disagree	Strongly Agree	Strongly Agree	Strongly Disagree	Strongly Agree	Strongly Agree	Strongly Agree	Strongly Agree	Neutral	Strongly Agree	Strongly Agree	Neutral	Strongly Agree	Neutral	Strongly Agree	Strongly Agree	Strongly Agree
2	Female	18-20	UG	3rd Year	South India	INSIDE INDIA	No		Limited interest in healthcare topics
3	Female	18-20	UG	3rd Year	South India	INSIDE INDIA	Yes	Research articles		No	Yes	Patient assessment and monitoring through telehealth		Agree	Agree	Neutral	Agree	Disagree	Agree	Neutral	Strongly Disagree	Neutral	Agree	Neutral	Agree	Strongly Disagree	Strongly Disagree	Agree	Agree	Strongly Disagree	Strongly Disagree	Strongly Disagree	Disagree	Strongly Disagree	Strongly Disagree	Strongly Disagree	Agree	Neutral	Neutral	Agree	Agree	Agree	Neutral	Disagree	Agree	Neutral	Neutral	Neutral
4	Female	18-20	UG	3rd Year	South India	INSIDE INDIA	Yes	Social media		No	Yes	Patient assessment and monitoring through telehealth		Strongly Agree	Strongly Agree	Strongly Agree	Strongly Agree	Strongly Agree	Neutral	Strongly Agree	Strongly Agree	Strongly Agree	Strongly Agree	Strongly Agree	Strongly Agree	Strongly Agree	Strongly Agree	Strongly Agree	Strongly Agree	Strongly Agree	Strongly Agree	Strongly Agree	Strongly Agree	Strongly Agree	Strongly Agree	Strongly Agree	Strongly Agree	Strongly Agree	Strongly Agree	Strongly Agree	Strongly Agree	Strongly Agree	Strongly Agree	Strongly Agree	Strongly Agree	Strongly Agree	Strongly Agree	Strongly Agree
5	Female	18-20	UG	3rd Year	South India	INSIDE INDIA	Yes	Workshops or seminars		No	Yes	Practical application of telerehabilitation techniques		Disagree	Neutral	Neutral	Disagree	Disagree	Disagree	Neutral	Strongly Agree	Disagree	Neutral	Neutral	Strongly Disagree	Disagree	Strongly Disagree	Strongly Agree	Strongly Disagree	Strongly Agree	Disagree	Strongly Disagree	Strongly Disagree	Disagree	Strongly Agree	Strongly Disagree	Strongly Disagree	Neutral	Neutral	Neutral	Neutral	Disagree	Strongly Agree	Neutral	Neutral	Strongly Agree	Disagree	Neutral
6	Female	18-20	UG	3rd Year	North India	INSIDE INDIA	Yes	Academic courses		No	Yes	Practical application of telerehabilitation techniques		Disagree	Neutral	Neutral	Strongly Agree	Disagree	Disagree	Strongly Agree	Strongly Disagree	Disagree	Strongly Agree	Disagree	Strongly Agree	Strongly Disagree	Strongly Agree	Strongly Disagree	Strongly Disagree	Disagree	Strongly Agree	Strongly Agree	Strongly Disagree	Strongly Agree	Strongly Disagree	Disagree	Disagree	Neutral	Neutral	Strongly Agree	Strongly Agree	Neutral	Strongly Agree	Neutral	Neutral	Disagree	Strongly Agree	Strongly Agree
7	Female	18-20	UG	3rd Year	South India	INSIDE INDIA	Yes	Academic courses		No	Yes	Practical application of telerehabilitation techniques		Disagree	Neutral	Neutral	Strongly Agree	Disagree	Disagree	Strongly Agree	Strongly Disagree	Disagree	Strongly Agree	Disagree	Strongly Agree	Strongly Disagree	Strongly Agree	Strongly Disagree	Strongly Disagree	Disagree	Strongly Agree	Strongly Agree	Strongly Disagree	Strongly Agree	Strongly Disagree	Disagree	Disagree	Neutral	Neutral	Strongly Agree	Strongly Agree	Neutral	Strongly Agree	Neutral	Neutral	Disagree	Strongly Agree	Strongly Agree
8	Female	18-20	UG	3rd Year	South India	INSIDE INDIA	Yes	Workshops or seminars		Yes	Yes	Practical application of telerehabilitation techniques		Neutral	Agree	Neutral	Neutral	Agree	Agree	Disagree	Strongly Disagree	Neutral	Agree	Neutral	Strongly Disagree	Agree	Strongly Disagree	Strongly Disagree	Agree	Strongly Disagree	Strongly Disagree	Agree	Strongly Disagree	Strongly Disagree	Agree	Strongly Disagree	Agree	Neutral	Neutral	Neutral	Disagree	Agree	Neutral	Disagree	Agree	Neutral	Agree	Neutral
9	Male	18-20	UG	3rd Year	South India	INSIDE INDIA	Yes	Research articles		No	Yes	Understanding telecommunication technologies		Strongly Agree	Strongly Agree	Strongly Agree	Strongly Agree	Strongly Agree	Strongly Agree	Strongly Agree	Strongly Agree	Strongly Agree	Strongly Agree	Strongly Agree	Strongly Agree	Strongly Agree	Strongly Agree	Strongly Agree	Strongly Agree	Strongly Agree	Strongly Agree	Strongly Agree	Strongly Agree	Strongly Agree	Strongly Agree	Strongly Agree	Strongly Agree	Strongly Agree	Strongly Agree	Strongly Agree	Strongly Agree	Strongly Agree	Strongly Agree	Strongly Agree	Strongly Agree	Strongly Agree	Strongly Agree	Strongly Agree
10	Female	18-20	UG	3rd Year	South India	INSIDE INDIA	Yes	Academic courses		Yes	Yes	Patient assessment and monitoring through telehealth		Neutral	Neutral	Agree	Agree	Neutral	Agree	Neutral	Agree	Agree	Agree	Agree	Strongly Disagree	Strongly Disagree	Agree	Strongly Disagree	Agree	Agree	Agree	Strongly Disagree	Agree	Agree	Agree	Agree	Agree	Neutral	Agree	Agree	Agree	Neutral	Neutral	Agree	Agree	Agree	Neutral	Neutral
11	Female	18-20	UG	3rd Year	North India	INSIDE INDIA	Yes	Research articles		No	Yes	Practical application of telerehabilitation techniques		Neutral	Neutral	Neutral	Strongly Agree	Neutral	Neutral	Strongly Agree	Strongly Agree	Strongly Agree	Strongly Agree	Strongly Agree	Strongly Disagree	Strongly Disagree	Strongly Agree	Strongly Agree	Strongly Disagree	Strongly Disagree	Strongly Agree	Strongly Disagree	Strongly Disagree	Strongly Agree	Strongly Agree	Strongly Agree	Strongly Disagree	Neutral	Strongly Agree	Strongly Agree	Strongly Agree	Strongly Agree	Neutral	Neutral	Neutral	Strongly Agree	Neutral	Strongly Agree
12	Female	18-20	UG	3rd Year	South India	INSIDE INDIA	Yes	Research articles		No	Yes	Practical application of telerehabilitation techniques		Neutral	Agree	Agree	Neutral	Neutral	Agree	Agree	Agree	Agree	Neutral	Neutral	Agree	Agree	Strongly Disagree	Agree	Agree	Strongly Disagree	Strongly Disagree	Agree	Agree	Agree	Strongly Disagree	Agree	Strongly Disagree	Neutral	Agree	Agree	Neutral	Neutral	Agree	Agree	Agree	Neutral	Neutral	Agree
13	Male	21-25	PG	2nd Year	South India	INSIDE INDIA	Yes	Social media		No	Yes	Patient assessment and monitoring through telehealth		Neutral	Neutral	Neutral	Neutral	Neutral	Neutral	Neutral	Disagree	Neutral	Neutral	Strongly Agree	Strongly Agree	Strongly Disagree	Strongly Disagree	Strongly Agree	Strongly Agree	Strongly Disagree	Strongly Disagree	Strongly Agree	Strongly Disagree	Strongly Disagree	Strongly Disagree	Strongly Disagree	Strongly Disagree	Neutral	Neutral	Strongly Agree	Strongly Agree	Neutral	Neutral	Neutral	Neutral	Neutral	Neutral	Neutral
14	Female	18-20	UG	3rd Year	South India	INSIDE INDIA	Yes	Academic courses		Yes	Yes	Patient assessment and monitoring through telehealth		Neutral	Neutral	Neutral	Neutral	Neutral	Neutral	Neutral	Strongly Disagree	Neutral	Neutral	Neutral	Strongly Disagree	Strongly Disagree	Strongly Disagree	Strongly Disagree	Strongly Disagree	Strongly Disagree	Strongly Disagree	Strongly Disagree	Strongly Disagree	Strongly Disagree	Strongly Disagree	Strongly Disagree	Strongly Disagree	Neutral	Neutral	Neutral	Neutral	Neutral	Neutral	Neutral	Neutral	Neutral	Neutral	Neutral
15	Female	21-25	UG	Intern	South India	INSIDE INDIA	Yes	Social media		No	Yes	Patient assessment and monitoring through telehealth		Neutral	Disagree	Disagree	Disagree	Disagree	Neutral	Strongly Agree	Disagree	Disagree	Neutral	Disagree	Strongly Disagree	Strongly Disagree	Strongly Disagree	Strongly Disagree	Strongly Disagree	Disagree	Disagree	Strongly Disagree	Strongly Disagree	Strongly Disagree	Strongly Disagree	Strongly Disagree	Strongly Disagree	Disagree	Neutral	Neutral	Neutral	Neutral	Neutral	Neutral	Neutral	Neutral	Neutral	Neutral
16	Female	21-25	UG	Intern	South India	INSIDE INDIA	Yes	Research articles		No	Yes	Practical application of telerehabilitation techniques		Neutral	Neutral	Neutral	Neutral	Neutral	Neutral	Neutral	Strongly Disagree	Neutral	Neutral	Neutral	Strongly Agree	Strongly Disagree	Strongly Disagree	Strongly Disagree	Strongly Disagree	Strongly Disagree	Strongly Disagree	Strongly Disagree	Strongly Disagree	Strongly Disagree	Strongly Disagree	Strongly Disagree	Strongly Disagree	Strongly Agree	Strongly Agree	Strongly Agree	Neutral	Strongly Agree	Strongly Agree	Strongly Agree	Neutral	Neutral	Neutral	Neutral
17	Female	21-25	UG	3rd Year	South India	INSIDE INDIA	No		Others
18	Male	21-25	UG	4th Year	North West India	INSIDE INDIA	No		Limited interest in healthcare topics
19	Female	18-20	UG	3rd Year	North India	INSIDE INDIA	Yes	Research articles		No	Yes	Practical application of telerehabilitation techniques		Strongly Agree	Strongly Agree	Strongly Agree	Strongly Agree	Strongly Agree	Strongly Agree	Strongly Agree	Strongly Agree	Strongly Agree	Strongly Agree	Strongly Agree	Strongly Disagree	Disagree	Strongly Agree	Strongly Agree	Strongly Agree	Strongly Agree	Strongly Agree	Strongly Agree	Strongly Agree	Strongly Agree	Strongly Agree	Strongly Agree	Strongly Agree	Strongly Agree	Strongly Agree	Strongly Agree	Strongly Agree	Strongly Agree	Strongly Agree	Strongly Agree	Strongly Agree	Strongly Agree	Strongly Agree	Strongly Agree
20	Male	21-25	UG	3rd Year	North East India	INSIDE INDIA	Yes	Research articles		No	Yes	Practical application of telerehabilitation techniques		Neutral	Strongly Agree	Neutral	Strongly Agree	Neutral	Strongly Agree	Strongly Agree	Strongly Agree	Strongly Agree	Strongly Agree	Strongly Agree	Strongly Agree	Strongly Agree	Strongly Disagree	Strongly Agree	Strongly Agree	Strongly Agree	Strongly Agree	Strongly Disagree	Strongly Disagree	Strongly Agree	Strongly Disagree	Strongly Agree	Strongly Agree	Strongly Agree	Strongly Agree	Neutral	Strongly Agree	Neutral	Strongly Agree	Strongly Agree	Strongly Agree	Neutral	Disagree	Neutral
21	Male	18-20	UG	3rd Year	North India	INSIDE INDIA	No		Limited interest in healthcare topics
22	Female	18-20	UG	4th Year	Central India	INSIDE INDIA	Yes	Academic courses		No	Yes	Practical application of telerehabilitation techniques		Neutral	Strongly Agree	Strongly Agree	Strongly Agree	Neutral	Strongly Agree	Neutral	Strongly Agree	Strongly Agree	Strongly Agree	Neutral	Strongly Agree	Strongly Agree	Strongly Disagree	Strongly Disagree	Strongly Disagree	Strongly Disagree	Strongly Disagree	Strongly Agree	Strongly Agree	Strongly Agree	Strongly Agree	Strongly Disagree	Strongly Disagree	Strongly Agree	Neutral	Neutral	Neutral	Neutral	Strongly Agree	Neutral	Neutral	Neutral	Neutral	Neutral
23	Male	21-25	UG	3rd Year	South India	INSIDE INDIA	Yes	Research articles		No	Yes	Practical application of telerehabilitation techniques		Neutral	Neutral	Strongly Agree	Strongly Agree	Neutral	Neutral	Neutral	Strongly Disagree	Neutral	Neutral	Neutral	Strongly Disagree	Strongly Disagree	Strongly Disagree	Strongly Disagree	Strongly Disagree	Strongly Disagree	Strongly Disagree	Strongly Disagree	Strongly Disagree	Strongly Disagree	Strongly Disagree	Strongly Disagree	Strongly Disagree	Strongly Agree	Strongly Agree	Strongly Agree	Strongly Agree	Strongly Agree	Strongly Agree	Neutral	Neutral	Neutral	Strongly Agree	Neutral
24	Male	21-25	UG	Intern	West India	INSIDE INDIA	Yes	Social media		Yes	Yes	Practical application of telerehabilitation techniques		Strongly Agree	Strongly Agree	Strongly Agree	Strongly Agree	Strongly Agree	Strongly Agree	Strongly Agree	Strongly Agree	Strongly Agree	Strongly Agree	Strongly Agree	Strongly Agree	Strongly Agree	Strongly Agree	Strongly Agree	Strongly Agree	Strongly Agree	Strongly Agree	Strongly Agree	Strongly Agree	Strongly Agree	Strongly Agree	Strongly Agree	Strongly Agree	Strongly Agree	Strongly Agree	Neutral	Strongly Agree	Strongly Agree	Strongly Agree	Strongly Agree	Strongly Agree	Strongly Agree	Strongly Agree	Strongly Agree
25	Male	21-25	UG	4th Year	North India	INSIDE INDIA	Yes	Social media		No	No		Prefer traditional in-person instruction	Strongly Agree	Strongly Agree	Strongly Agree	Strongly Agree	Strongly Disagree	Neutral	Neutral	Strongly Disagree	Neutral	Strongly Disagree	Neutral	Strongly Agree	Strongly Agree	Strongly Agree	Strongly Agree	Strongly Disagree	Strongly Disagree	Strongly Agree	Strongly Agree	Strongly Agree	Strongly Agree	Strongly Agree	Strongly Agree	Strongly Agree	Neutral	Neutral	Neutral	Strongly Agree	Strongly Agree	Strongly Agree	Neutral	Neutral	Neutral	Strongly Agree	Strongly Agree
26	Female	21-25	UG	4th Year	North India	INSIDE INDIA	Yes	Academic courses		No	Yes	Practical application of telerehabilitation techniques		Neutral	Strongly Agree	Strongly Agree	Neutral	Strongly Agree	Neutral	Neutral	Strongly Agree	Neutral	Strongly Agree	Strongly Agree	Strongly Disagree	Strongly Agree	Strongly Disagree	Strongly Disagree	Strongly Agree	Strongly Agree	Strongly Disagree	Strongly Agree	Strongly Disagree	Strongly Agree	Strongly Agree	Strongly Disagree	Strongly Agree	Strongly Agree	Strongly Agree	Neutral	Strongly Agree	Strongly Agree	Strongly Disagree	Strongly Disagree	Neutral	Strongly Agree	Strongly Agree	Strongly Agree
27	Female	21-25	PG	2nd Year	East India	INSIDE INDIA	Yes	Workshops or seminars		No	Yes	Practical application of telerehabilitation techniques		Strongly Agree	Strongly Agree	Strongly Agree	Neutral	Neutral	Neutral	Strongly Agree	Strongly Agree	Strongly Agree	Strongly Agree	Strongly Agree	Strongly Disagree	Strongly Agree	Strongly Agree	Strongly Agree	Strongly Agree	Strongly Agree	Strongly Agree	Strongly Agree	Strongly Agree	Strongly Agree	Strongly Agree	Strongly Agree	Strongly Agree	Strongly Agree	Strongly Agree	Strongly Agree	Strongly Agree	Strongly Agree	Strongly Agree	Strongly Agree	Strongly Agree	Strongly Agree	Strongly Agree	Strongly Agree
28	Female	21-25	PG	2nd Year	North East India	INSIDE INDIA	Yes	Research articles		No	Yes	Practical application of telerehabilitation techniques		Neutral	Neutral	Neutral	Neutral	Neutral	Neutral	Neutral	Strongly Disagree	Neutral	Neutral	Neutral	Strongly Disagree	Strongly Disagree	Strongly Disagree	Strongly Disagree	Strongly Disagree	Strongly Disagree	Strongly Disagree	Strongly Disagree	Strongly Disagree	Strongly Disagree	Strongly Disagree	Strongly Disagree	Strongly Disagree	Strongly Disagree	Neutral	Neutral	Neutral	Neutral	Neutral	Neutral	Neutral	Neutral	Neutral	Neutral
29	Male	18-20	UG	3rd Year	West India	INSIDE INDIA	Yes	Research articles		No	Yes	Patient assessment and monitoring through telehealth		Neutral	Strongly Agree	Strongly Agree	Neutral	Neutral	Strongly Agree	Strongly Agree	Strongly Agree	Neutral	Neutral	Strongly Agree	Strongly Disagree	Strongly Disagree	Strongly Disagree	Strongly Agree	Strongly Agree	Strongly Disagree	Strongly Agree	Strongly Agree	Strongly Disagree	Strongly Agree	Strongly Disagree	Strongly Agree	Strongly Disagree	Strongly Disagree	Neutral	Strongly Disagree	Strongly Disagree	Strongly Disagree	Strongly Disagree	Neutral	Strongly Disagree	Neutral	Strongly Disagree	Strongly Disagree
30	Male	>25	Ph.d.,		East India	INSIDE INDIA	Yes	Social media		No	Yes	Practical application of telerehabilitation techniques		Neutral	Strongly Agree	Strongly Disagree	Strongly Disagree	Strongly Disagree	Strongly Disagree	Strongly Agree	Strongly Agree	Strongly Disagree	Strongly Disagree	Strongly Disagree	Strongly Agree	Strongly Agree	Strongly Agree	Strongly Disagree	Strongly Agree	Strongly Disagree	Strongly Disagree	Strongly Agree	Strongly Agree	Strongly Agree	Strongly Agree	Strongly Agree	Strongly Disagree	Strongly Disagree	Strongly Disagree	Strongly Disagree	Strongly Disagree	Strongly Disagree	Strongly Disagree	Neutral	Strongly Disagree	Neutral	Strongly Disagree	Strongly Disagree
31	Male	21-25	UG	4th Year	Central India	INSIDE INDIA	Yes	Academic courses		No	Yes	Understanding telecommunication technologies		Neutral	Neutral	Neutral	Neutral	Strongly Agree	Strongly Disagree	Strongly Agree	Strongly Agree	Strongly Agree	Strongly Agree	Neutral	Strongly Disagree	Strongly Agree	Strongly Agree	Strongly Agree	Strongly Disagree	Strongly Agree	Strongly Agree	Strongly Agree	Strongly Disagree	Strongly Agree	Strongly Agree	Strongly Agree	Strongly Agree	Strongly Disagree	Neutral	Strongly Disagree	Strongly Disagree	Strongly Disagree	Strongly Disagree	Neutral	Neutral	Strongly Disagree	Strongly Disagree	Strongly Disagree
32	Female	18-20	UG	4th Year	North India	INSIDE INDIA	No		Lack of exposure/information
33	Female	21-25	UG	4th Year	North East India	INSIDE INDIA	Yes	Social media		No	Yes	Practical application of telerehabilitation techniques		Disagree	Disagree	Neutral	Agree	Disagree	Disagree	Agree	Agree	Disagree	Agree	Disagree	Strongly Disagree	Agree	Agree	Agree	Agree	Strongly Disagree	Agree	Agree	Agree	Agree	Agree	Agree	Agree	Agree	Agree	Agree	Agree	Strongly Disagree	Agree	Neutral	Neutral	Agree	Agree	Agree
34	Female	18-20	UG	4th Year	South India	INSIDE INDIA	No		Lack of exposure/information
35	Male	21-25	UG	4th Year	West India	INSIDE INDIA	Yes	Social media		No	Yes	Practical application of telerehabilitation techniques		Neutral	Agree	Neutral	Agree	Disagree	Agree	Agree	Agree	Agree	Agree	Disagree	Agree	Agree	Agree	Agree	Agree	Agree	Agree	Agree	Agree	Agree	Agree	Agree	Agree	Agree	Agree	Agree	Agree	Agree	Agree	Agree	Agree	Agree	Agree	Agree
36	Male	21-25	UG	Intern	East India	INSIDE INDIA	No		Limited interest in healthcare topics
37	Female	18-20	UG	4th Year	North East India	INSIDE INDIA	Yes	Research articles		No	No		Not relevant to my career goals	Agree	Neutral	Neutral	Agree	Neutral	Agree	Agree	Strongly Disagree	Agree	Agree	Neutral	Agree	Strongly Disagree	Agree	Agree	Agree	Strongly Disagree	Agree	Agree	Strongly Disagree	Agree	Agree	Agree	Strongly Disagree	Agree	Neutral	Neutral	Agree	Strongly Disagree	Agree	Agree	Neutral	Neutral	Agree	Neutral
38	Female	21-25	UG	3rd Year	Central India	INSIDE INDIA	Yes	Workshops or seminars		No	Yes	Practical application of telerehabilitation techniques		Neutral	Strongly Agree	Strongly Agree	Strongly Agree	Strongly Agree	Strongly Agree	Strongly Agree	Strongly Agree	Strongly Agree	Neutral	Neutral	Strongly Agree	Strongly Disagree	Strongly Disagree	Strongly Disagree	Strongly Agree	Strongly Disagree	Strongly Agree	Strongly Disagree	Strongly Agree	Strongly Disagree	Strongly Agree	Strongly Agree	Strongly Agree	Neutral	Neutral	Strongly Disagree	Strongly Disagree	Strongly Disagree	Strongly Disagree	Neutral	Strongly Disagree	Strongly Disagree	Neutral	Strongly Disagree
39	Female	18-20	UG	3rd Year	West India	INSIDE INDIA	No		Lack of exposure/information
40	Female	21-25	UG	3rd Year	East India	INSIDE INDIA	Yes	Academic courses		No	Yes	Patient assessment and monitoring through telehealth		Agree	Neutral	Agree	Disagree	Disagree	Agree	Disagree	Disagree	Disagree	Disagree	Disagree	Agree	Agree	Agree	Strongly Disagree	Strongly Disagree	Strongly Disagree	Strongly Disagree	Strongly Disagree	Strongly Disagree	Disagree	Strongly Disagree	Strongly Disagree	Agree	Disagree	Neutral	Agree	Agree	Strongly Disagree	Neutral	Disagree	Strongly Disagree	Neutral	Neutral	Agree
41	Female	18-20	UG	3rd Year	North West India	INSIDE INDIA	Yes	Social media		Yes	Yes	Patient assessment and monitoring through telehealth		Neutral	Neutral	Disagree	Neutral	Strongly Agree	Neutral	Neutral	Strongly Agree	Disagree	Strongly Agree	Neutral	Strongly Agree	Strongly Agree	Strongly Agree	Strongly Disagree	Strongly Disagree	Disagree	Strongly Disagree	Strongly Agree	Strongly Disagree	Strongly Agree	Strongly Disagree	Strongly Agree	Strongly Agree	Neutral	Neutral	Neutral	Strongly Disagree	Strongly Disagree	Neutral	Strongly Disagree	Neutral	Strongly Disagree	Strongly Disagree	Strongly Disagree
42	Female	18-20	UG	3rd Year	Central India	INSIDE INDIA	Yes	Social media		No	Yes	Practical application of telerehabilitation techniques		Neutral	Neutral	Neutral	Neutral	Neutral	Neutral	Neutral	Strongly Disagree	Neutral	Neutral	Neutral	Strongly Disagree	Strongly Disagree	Agree	Strongly Disagree	Agree	Disagree	Strongly Disagree	Disagree	Agree	Strongly Disagree	Agree	Disagree	Agree	Neutral	Neutral	Neutral	Strongly Disagree	Strongly Disagree	Neutral	Neutral	Neutral	Neutral	Neutral	Neutral
43	Male	21-25	UG	4th Year	West India	INSIDE INDIA	No		Lack of exposure/information
44	Male	18-20	UG	3rd Year	East India	INSIDE INDIA	Yes	Academic courses		No	Yes	Legal and ethical considerations		Strongly Agree	Strongly Agree	Strongly Agree	Strongly Agree	Strongly Agree	Strongly Agree	Strongly Agree	Strongly Agree	Strongly Agree	Strongly Agree	Strongly Agree	Strongly Agree	Strongly Agree	Strongly Disagree	Strongly Disagree	Strongly Agree	Strongly Disagree	Strongly Agree	Strongly Agree	Strongly Agree	Strongly Agree	Strongly Agree	Strongly Disagree	Strongly Agree	Strongly Disagree	Neutral	Strongly Disagree	Strongly Disagree	Strongly Disagree	Neutral	Strongly Disagree	Strongly Disagree	Strongly Disagree	Strongly Disagree	Strongly Disagree
45	Female	21-25	UG	Intern	South India	INSIDE INDIA	Yes	Social media		No	Yes	Patient assessment and monitoring through telehealth		Strongly Agree	Strongly Agree	Strongly Agree	Strongly Agree	Neutral	Neutral	Neutral	Strongly Agree	Strongly Agree	Strongly Agree	Neutral	Strongly Disagree	Strongly Disagree	Strongly Agree	Strongly Disagree	Strongly Agree	Strongly Disagree	Strongly Disagree	Strongly Agree	Strongly Agree	Strongly Agree	Strongly Agree	Strongly Agree	Strongly Disagree	Strongly Disagree	Neutral	Neutral	Strongly Disagree	Strongly Disagree	Neutral	Neutral	Neutral	Strongly Disagree	Strongly Disagree	Strongly Disagree
46	Male	18-20	UG	3rd Year	North East India	INSIDE INDIA	Yes	Social media		No	Yes	Practical application of telerehabilitation techniques		Neutral	Neutral	Strongly Agree	Neutral	Neutral	Neutral	Strongly Agree	Strongly Agree	Strongly Agree	Strongly Agree	Strongly Agree	Strongly Disagree	Strongly Disagree	Strongly Disagree	Strongly Disagree	Strongly Disagree	Strongly Disagree	Strongly Agree	Strongly Agree	Strongly Agree	Strongly Disagree	Strongly Disagree	Strongly Disagree	Strongly Agree	Neutral	Strongly Disagree	Strongly Disagree	Strongly Disagree	Strongly Disagree	Strongly Disagree	Neutral	Strongly Disagree	Neutral	Strongly Disagree	Strongly Disagree
47	Female	18-20	UG	3rd Year	South India	INSIDE INDIA	Yes	Research articles		No	No		Prefer traditional in-person instruction	Strongly Agree	Neutral	Neutral	Neutral	Neutral	Neutral	Neutral	Strongly Disagree	Neutral	Neutral	Neutral	Strongly Disagree	Strongly Disagree	Strongly Disagree	Strongly Disagree	Strongly Disagree	Strongly Disagree	Strongly Disagree	Strongly Disagree	Strongly Disagree	Strongly Disagree	Strongly Disagree	Strongly Disagree	Strongly Disagree	Neutral	Neutral	Neutral	Strongly Disagree	Strongly Disagree	Neutral	Neutral	Neutral	Neutral	Neutral	Neutral
48	Female	18-20	UG	3rd Year	East India	INSIDE INDIA	Yes	Academic courses		Yes	Yes	Practical application of telerehabilitation techniques		Neutral	Strongly Agree	Strongly Agree	Strongly Agree	Strongly Disagree	Strongly Agree	Neutral	Strongly Agree	Strongly Agree	Neutral	Strongly Disagree	Strongly Disagree	Strongly Agree	Strongly Agree	Strongly Disagree	Strongly Agree	Strongly Agree	Strongly Disagree	Strongly Disagree	Strongly Disagree	Strongly Disagree	Strongly Agree	Strongly Agree	Strongly Agree	Strongly Disagree	Strongly Disagree	Strongly Disagree	Strongly Disagree	Strongly Disagree	Strongly Disagree	Neutral	Neutral	Neutral	Strongly Disagree	Strongly Disagree
49	Male	21-25	UG	3rd Year	North India	INSIDE INDIA	No		Lack of exposure/information
50	Female	21-25	UG	Intern	Central India	INSIDE INDIA	Yes	Social media		No	Yes	Patient assessment and monitoring through telehealth		Strongly Agree	Strongly Agree	Neutral	Neutral	Disagree	Strongly Agree	Strongly Agree	Disagree	Strongly Agree	Strongly Agree	Strongly Agree	Strongly Agree	Strongly Agree	Strongly Agree	Strongly Agree	Strongly Agree	Strongly Disagree	Strongly Disagree	Strongly Agree	Strongly Agree	Strongly Disagree	Strongly Agree	Strongly Agree	Strongly Disagree	Neutral	Neutral	Strongly Disagree	Strongly Disagree	Strongly Disagree	Neutral	Neutral	Strongly Disagree	Strongly Disagree	Strongly Disagree	Strongly Disagree
51	Female	18-20	UG	3rd Year	East India	INSIDE INDIA	Yes	Social media		No	Yes	Patient assessment and monitoring through telehealth		Strongly Agree	Neutral	Neutral	Neutral	Neutral	Neutral	Neutral	Strongly Disagree	Neutral	Neutral	Neutral	Strongly Disagree	Strongly Disagree	Strongly Disagree	Strongly Disagree	Strongly Disagree	Strongly Disagree	Strongly Disagree	Strongly Disagree	Strongly Disagree	Strongly Disagree	Strongly Disagree	Strongly Disagree	Strongly Disagree	Neutral	Neutral	Neutral	Strongly Disagree	Strongly Disagree	Neutral	Neutral	Neutral	Neutral	Neutral	Neutral
52	Female	18-20	UG	3rd Year	South India	INSIDE INDIA	No		Lack of exposure/information
53	Female	18-20	UG	Intern	North India	INSIDE INDIA	Yes	Academic courses		Yes	Yes	Practical application of telerehabilitation techniques		Strongly Agree	Strongly Agree	Neutral	Strongly Agree	Neutral	Neutral	Strongly Agree	Strongly Agree	Strongly Agree	Neutral	Strongly Agree	Strongly Disagree	Strongly Disagree	Strongly Disagree	Strongly Disagree	Strongly Disagree	Strongly Disagree	Strongly Disagree	Strongly Disagree	Strongly Disagree	Strongly Disagree	Strongly Disagree	Strongly Disagree	Strongly Disagree	Neutral	Neutral	Neutral	Strongly Disagree	Strongly Disagree	Neutral	Neutral	Neutral	Neutral	Neutral	Neutral
54	Female	18-20	UG	3rd Year	South India	INSIDE INDIA	Yes	Social media		Yes	Yes	Patient assessment and monitoring through telehealth		Neutral	Strongly Agree	Strongly Agree	Neutral	Neutral	Strongly Agree	Neutral	Strongly Agree	Strongly Agree	Neutral	Strongly Agree	Strongly Disagree	Strongly Agree	Strongly Disagree	Strongly Agree	Strongly Agree	Strongly Disagree	Strongly Disagree	Strongly Agree	Strongly Disagree	Strongly Disagree	Strongly Disagree	Strongly Agree	Strongly Disagree	Strongly Disagree	Neutral	Strongly Disagree	Strongly Disagree	Strongly Disagree	Strongly Disagree	Neutral	Neutral	Strongly Disagree	Neutral	Strongly Disagree
55	Male	18-20	UG	Intern	South India	INSIDE INDIA	Yes	Research articles		No	Yes	Practical application of telerehabilitation techniques		Neutral	Strongly Agree	Strongly Agree	Strongly Agree	Neutral	Strongly Agree	Neutral	Strongly Agree	Neutral	Strongly Agree	Strongly Agree	Strongly Agree	Strongly Agree	Strongly Agree	Strongly Agree	Strongly Agree	Strongly Disagree	Strongly Disagree	Strongly Agree	Strongly Disagree	Strongly Disagree	Strongly Agree	Strongly Disagree	Strongly Agree	Strongly Disagree	Strongly Disagree	Strongly Disagree	Strongly Disagree	Strongly Disagree	Strongly Disagree	Strongly Disagree	Strongly Disagree	Strongly Disagree	Strongly Disagree	Strongly Disagree
56	Male	21-25	UG	Intern	South India	INSIDE INDIA	Yes	Workshops or seminars		No	Yes	Patient assessment and monitoring through telehealth		Neutral	Neutral	Strongly Agree	Strongly Agree	Strongly Agree	Strongly Agree	Strongly Agree	Strongly Agree	Strongly Agree	Strongly Agree	Strongly Agree	Strongly Agree	Strongly Agree	Strongly Agree	Strongly Agree	Strongly Disagree	Strongly Disagree	Strongly Disagree	Strongly Disagree	Strongly Disagree	Strongly Disagree	Strongly Disagree	Strongly Disagree	Strongly Disagree	Strongly Disagree	Strongly Disagree	Strongly Disagree	Strongly Disagree	Strongly Disagree	Strongly Disagree	Strongly Disagree	Strongly Disagree	Strongly Disagree	Strongly Disagree	Strongly Disagree
57	Male	18-20	UG	Intern	Central India	INSIDE INDIA	Yes	Social media		No	No		Lack of time or resources	Neutral	Strongly Agree	Disagree	Strongly Agree	Strongly Agree	Neutral	Strongly Agree	Strongly Agree	Disagree	Neutral	Disagree	Strongly Agree	Strongly Agree	Strongly Agree	Strongly Agree	Strongly Agree	Strongly Disagree	Strongly Agree	Strongly Agree	Strongly Disagree	Strongly Disagree	Strongly Agree	Strongly Agree	Strongly Agree	Neutral	Strongly Disagree	Strongly Disagree	Strongly Disagree	Strongly Disagree	Strongly Disagree	Strongly Disagree	Strongly Disagree	Strongly Disagree	Strongly Disagree	Strongly Disagree
58	Male	18-20	UG	3rd Year	North India	INSIDE INDIA	Yes	Academic courses		No	Yes	Patient assessment and monitoring through telehealth		Neutral	Strongly Agree	Disagree	Neutral	Disagree	Strongly Agree	Strongly Agree	Neutral	Disagree	Strongly Agree	Disagree	Strongly Disagree	Strongly Disagree	Strongly Disagree	Strongly Disagree	Strongly Disagree	Strongly Disagree	Strongly Agree	Strongly Agree	Strongly Disagree	Strongly Disagree	Strongly Agree	Strongly Agree	Strongly Agree	Strongly Disagree	Strongly Disagree	Strongly Disagree	Strongly Disagree	Strongly Disagree	Strongly Disagree	Strongly Disagree	Strongly Disagree	Strongly Disagree	Strongly Disagree	Strongly Disagree
59	Male	18-20	UG	3rd Year	North India	INSIDE INDIA	Yes	Social media		No	Yes	Understanding telecommunication technologies		Disagree	Strongly Agree	Strongly Agree	Disagree	Disagree	Disagree	Strongly Agree	Strongly Agree	Disagree	Strongly Agree	Disagree	Strongly Agree	Disagree	Strongly Agree	Strongly Agree	Strongly Agree	Disagree	Strongly Agree	Strongly Agree	Strongly Disagree	Strongly Disagree	Strongly Agree	Strongly Agree	Disagree	Strongly Disagree	Disagree	Strongly Disagree	Strongly Disagree	Strongly Disagree	Strongly Disagree	Neutral	Strongly Disagree	Disagree	Strongly Disagree	Strongly Disagree
60	Male	18-20	UG	3rd Year	East India	INSIDE INDIA	Yes	Research articles		No	Yes	Practical application of telerehabilitation techniques		Neutral	Strongly Agree	Neutral	Neutral	Neutral	Neutral	Strongly Agree	Strongly Agree	Disagree	Disagree	Disagree	Strongly Agree	Disagree	Strongly Agree	Strongly Disagree	Strongly Disagree	Disagree	Strongly Agree	Strongly Disagree	Strongly Disagree	Strongly Disagree	Strongly Agree	Strongly Agree	Strongly Agree	Neutral	Neutral	Strongly Disagree	Strongly Disagree	Strongly Disagree	Strongly Disagree	Neutral	Neutral	Strongly Disagree	Strongly Disagree	Strongly Disagree
61	Female	18-20	UG	4th Year	East India	INSIDE INDIA	No		Lack of exposure/information
62	Female	18-20	UG	3rd Year	North India	INSIDE INDIA	No		Lack of exposure/information
63	Male	18-20	UG	3rd Year	West India	INSIDE INDIA	Yes	Research articles		No	Yes	Understanding telecommunication technologies		Strongly Agree	Strongly Agree	Strongly Agree	Disagree	Strongly Agree	Strongly Agree	Strongly Agree	Strongly Agree	Strongly Agree	Strongly Agree	Strongly Agree	Strongly Agree	Strongly Agree	Disagree	Strongly Agree	Strongly Agree	Disagree	Strongly Agree	Strongly Disagree	Strongly Disagree	Strongly Disagree	Strongly Agree	Strongly Agree	Disagree	Strongly Disagree	Disagree	Strongly Disagree	Disagree	Strongly Disagree	Strongly Disagree	Strongly Disagree	Neutral	Disagree	Strongly Disagree	Strongly Disagree
64	Female	21-25	PG	2nd Year	North East India	INSIDE INDIA	Yes	Research articles		Yes	Yes	Understanding telecommunication technologies		Neutral	Neutral	Disagree	Disagree	Neutral	Disagree	Strongly Agree	Disagree	Neutral	Disagree	Disagree	Strongly Disagree	Strongly Agree	Strongly Disagree	Strongly Agree	Strongly Disagree	Strongly Disagree	Strongly Disagree	Disagree	Disagree	Disagree	Strongly Disagree	Disagree	Disagree	Disagree	Disagree	Disagree	Strongly Disagree	Disagree	Neutral	Neutral	Strongly Disagree	Neutral	Neutral	Strongly Disagree
65	Female	18-20	UG	3rd Year	West India	INSIDE INDIA	No		Lack of exposure/information
66	Male	21-25	PG	2nd Year	Southeast Asia	OUTSIDE INDIA	Yes	Workshops or seminars		Yes	No		Prefer traditional in-person instruction	Neutral	Disagree	Disagree	Disagree	Disagree	Neutral	Strongly Agree	Neutral	Neutral	Disagree	Neutral	Strongly Agree	Strongly Agree	Strongly Disagree	Strongly Disagree	Strongly Disagree	Strongly Disagree	Strongly Disagree	Strongly Disagree	Strongly Disagree	Strongly Disagree	Strongly Disagree	Disagree	Disagree	Strongly Disagree	Strongly Disagree	Strongly Disagree	Strongly Disagree	Strongly Disagree	Disagree	Neutral	Neutral	Neutral	Strongly Disagree	Strongly Disagree
67	Female	18-20	UG	3rd Year	Southeast Asia	OUTSIDE INDIA	Yes	Social media		No	Yes	Understanding telecommunication technologies		Neutral	Neutral	Neutral	Disagree	Neutral	Strongly Agree	Neutral	Neutral	Strongly Agree	Strongly Agree	Strongly Agree	Strongly Disagree	Strongly Disagree	Strongly Disagree	Strongly Disagree	Strongly Disagree	Strongly Disagree	Strongly Disagree	Strongly Disagree	Strongly Disagree	Strongly Disagree	Strongly Disagree	Strongly Disagree	Strongly Disagree	Neutral	Strongly Disagree	Strongly Disagree	Strongly Disagree	Disagree	Strongly Disagree	Neutral	Neutral	Neutral	Neutral	Neutral
68	Female	21-25	UG	Intern	Southeast Asia	OUTSIDE INDIA	Yes	Social media		No	Yes	Patient assessment and monitoring through telehealth		Strongly Agree	Strongly Agree	Strongly Agree	Strongly Agree	Strongly Agree	Strongly Agree	Strongly Agree	Strongly Agree	Strongly Agree	Strongly Agree	Strongly Agree	Strongly Agree	Strongly Agree	Strongly Agree	Strongly Agree	Disagree	Strongly Agree	Strongly Agree	Strongly Agree	Strongly Disagree	Strongly Disagree	Strongly Agree	Strongly Agree	Strongly Agree	Strongly Disagree	Strongly Disagree	Strongly Disagree	Strongly Disagree	Strongly Disagree	Strongly Disagree	Strongly Disagree	Strongly Disagree	Strongly Disagree	Strongly Disagree	Strongly Disagree
69	Male	18-20	UG	3rd Year	Southeast Asia	OUTSIDE INDIA	Yes	Academic courses		No	Yes	Patient assessment and monitoring through telehealth		Strongly Agree	Strongly Agree	Neutral	Neutral	Strongly Agree	Neutral	Neutral	Strongly Agree	Strongly Agree	Neutral	Neutral	Strongly Agree	Strongly Disagree	Strongly Agree	Strongly Disagree	Strongly Disagree	Strongly Disagree	Strongly Disagree	Strongly Disagree	Strongly Disagree	Strongly Disagree	Strongly Disagree	Strongly Disagree	Strongly Disagree	Strongly Disagree	Strongly Disagree	Neutral	Strongly Disagree	Strongly Disagree	Neutral	Neutral	Neutral	Strongly Disagree	Strongly Disagree	Neutral
70	Male	18-20	UG	3rd Year	West India	INSIDE INDIA	No		Lack of exposure/information
71	Male	21-25	UG	Intern	North India	INSIDE INDIA	Yes	Research articles		No	Yes	Understanding telecommunication technologies		Neutral	Agree	Neutral	Agree	Neutral	Neutral	Agree	Agree	Neutral	Neutral	Neutral	Agree	Agree	Agree	Agree	Agree	Strongly Disagree	Strongly Disagree	Agree	Agree	Strongly Disagree	Agree	Agree	Strongly Disagree	Agree	Agree	Agree	Agree	Agree	Neutral	Agree	Agree	Agree	Agree	Agree
72	Female	18-20	UG	3rd Year	North East India	INSIDE INDIA	Yes	Workshops or seminars		Yes	Yes	Patient assessment and monitoring through telehealth		Neutral	Neutral	Neutral	Neutral	Agree	Agree	Agree	Neutral	Neutral	Neutral	Neutral	Strongly Disagree	Agree	Strongly Disagree	Strongly Disagree	Strongly Disagree	Disagree	Strongly Disagree	Strongly Disagree	Strongly Disagree	Agree	Strongly Disagree	Agree	Agree	Agree	Neutral	Agree	Strongly Disagree	Strongly Disagree	Neutral	Neutral	Neutral	Agree	Agree	Neutral
73	Male	18-20	UG	3rd Year	East India	INSIDE INDIA	Yes	Research articles		No	Yes	Practical application of telerehabilitation techniques		Neutral	Agree	Neutral	Neutral	Agree	Agree	Agree	Agree	Agree	Agree	Agree	Agree	Agree	Agree	Agree	Agree	Strongly Disagree	Strongly Disagree	Strongly Disagree	Strongly Disagree	Strongly Disagree	Strongly Disagree	Strongly Disagree	Strongly Disagree	Neutral	Neutral	Neutral	Strongly Disagree	Strongly Disagree	Neutral	Neutral	Neutral	Disagree	Neutral	Neutral
74	Female	18-20	UG	3rd Year	West India	INSIDE INDIA	Yes	Academic courses		Yes	Yes	Understanding telecommunication technologies		Neutral	Agree	Agree	Neutral	Neutral	Neutral	Neutral	Disagree	Neutral	Neutral	Disagree	Strongly Disagree	Strongly Disagree	Strongly Disagree	Strongly Disagree	Strongly Disagree	Strongly Disagree	Strongly Disagree	Strongly Disagree	Strongly Disagree	Strongly Disagree	Strongly Disagree	Strongly Disagree	Strongly Disagree	Neutral	Neutral	Neutral	Agree	Strongly Disagree	Disagree	Agree	Neutral	Disagree	Agree	Neutral
75	Male	18-20	UG	3rd Year	Central India	INSIDE INDIA	Yes	Workshops or seminars		No	Yes	Practical application of telerehabilitation techniques		Neutral	Agree	Agree	Agree	Agree	Neutral	Agree	Neutral	Neutral	Neutral	Neutral	Strongly Disagree	Strongly Disagree	Strongly Disagree	Strongly Disagree	Agree	Disagree	Strongly Disagree	Strongly Disagree	Agree	Strongly Disagree	Agree	Agree	Agree	Neutral	Agree	Agree	Strongly Disagree	Strongly Disagree	Agree	Neutral	Neutral	Neutral	Agree	Neutral
76	Female	18-20	UG	3rd Year	West India	INSIDE INDIA	No		Insufficient educational background
77	Female	21-25	UG	4th Year	East India	INSIDE INDIA	Yes	Social media		No	Yes	Understanding telecommunication technologies		Neutral	Neutral	Strongly Agree	Strongly Agree	Disagree	Neutral	Disagree	Strongly Agree	Disagree	Strongly Agree	Disagree	Disagree	Strongly Agree	Strongly Agree	Strongly Agree	Strongly Agree	Strongly Agree	Strongly Agree	Strongly Agree	Strongly Disagree	Strongly Disagree	Strongly Agree	Strongly Agree	Strongly Agree	Strongly Disagree	Strongly Disagree	Strongly Disagree	Strongly Disagree	Strongly Disagree	Strongly Disagree	Strongly Disagree	Strongly Disagree	Strongly Disagree	Neutral	Strongly Disagree
78	Female	18-20	UG	3rd Year	South India	INSIDE INDIA	Yes	Social media		No	Yes	Understanding telecommunication technologies		Neutral	Neutral	Neutral	Neutral	Neutral	Neutral	Neutral	Neutral	Neutral	Neutral	Neutral	Strongly Disagree	Strongly Disagree	Strongly Disagree	Strongly Disagree	Strongly Disagree	Strongly Disagree	Strongly Disagree	Strongly Disagree	Strongly Disagree	Strongly Disagree	Strongly Disagree	Strongly Disagree	Strongly Disagree	Neutral	Neutral	Neutral	Strongly Disagree	Strongly Disagree	Neutral	Neutral	Neutral	Neutral	Neutral	Neutral
79	Male	18-20	UG	3rd Year	South India	INSIDE INDIA	Yes	Academic courses		Yes	No		Not relevant to my career goals	Disagree	Neutral	Strongly Agree	Neutral	Disagree	Neutral	Strongly Agree	Neutral	Disagree	Neutral	Strongly Agree	Strongly Disagree	Disagree	Strongly Agree	Strongly Agree	Disagree	Strongly Agree	Strongly Disagree	Disagree	Agree	Disagree	Strongly Agree	Strongly Disagree	Disagree	Neutral	Disagree	Strongly Disagree	Strongly Disagree	Disagree	Strongly Disagree	Neutral	Neutral	Strongly Disagree	Disagree	Neutral
80	Female	21-25	UG	3rd Year	East India	INSIDE INDIA	Yes	Social media		Yes	Yes	Patient assessment and monitoring through telehealth		Neutral	Neutral	Neutral	Neutral	Neutral	Neutral	Strongly Agree	Strongly Agree	Neutral	Neutral	Disagree	Strongly Disagree	Strongly Disagree	Strongly Agree	Strongly Agree	Strongly Agree	Strongly Disagree	Strongly Disagree	Strongly Disagree	Strongly Disagree	Strongly Disagree	Strongly Disagree	Strongly Agree	Disagree	Neutral	Neutral	Neutral	Strongly Disagree	Strongly Disagree	Neutral	Neutral	Neutral	Neutral	Neutral	Neutral
81	Female	18-20	UG	3rd Year	North India	INSIDE INDIA	Yes	Academic courses		No	No		Lack of time or resources	Neutral	Neutral	Neutral	Neutral	Neutral	Neutral	Neutral	Neutral	Neutral	Neutral	Neutral	Strongly Disagree	Strongly Disagree	Agree	Strongly Disagree	Strongly Disagree	Strongly Disagree	Strongly Disagree	Strongly Disagree	Strongly Disagree	Strongly Disagree	Strongly Disagree	Strongly Disagree	Strongly Disagree	Neutral	Neutral	Neutral	Strongly Disagree	Strongly Disagree	Neutral	Neutral	Neutral	Neutral	Neutral	Neutral
82	Female	18-20	UG	3rd Year	West India	INSIDE INDIA	Yes	Academic courses		No	Yes	Practical application of telerehabilitation techniques		Neutral	Strongly Agree	Strongly Agree	Neutral	Neutral	Neutral	Strongly Agree	Neutral	Neutral	Neutral	Neutral	Strongly Disagree	Strongly Agree	Agree	Strongly Disagree	Strongly Agree	Disagree	Strongly Disagree	Strongly Agree	Strongly Disagree	Agree	Strongly Disagree	Strongly Agree	Strongly Agree	Neutral	Neutral	Neutral	Strongly Disagree	Strongly Disagree	Strongly Disagree	Neutral	Neutral	Neutral	Strongly Disagree	Strongly Disagree
83	Female	18-20	UG	4th Year	North East India	INSIDE INDIA	Yes	Academic courses		No	Yes	Practical application of telerehabilitation techniques		Strongly Agree	Strongly Agree	Strongly Agree	Strongly Agree	Strongly Agree	Neutral	Neutral	Strongly Agree	Strongly Agree	Neutral	Strongly Agree	Strongly Agree	Strongly Agree	Agree	Strongly Agree	Strongly Agree	Strongly Agree	Strongly Agree	Strongly Agree	Agree	Agree	Strongly Disagree	Strongly Disagree	Strongly Agree	Strongly Disagree	Strongly Disagree	Strongly Disagree	Strongly Disagree	Strongly Disagree	Neutral	Neutral	Neutral	Strongly Disagree	Strongly Disagree	Strongly Disagree
84	Female	18-20	UG	4th Year	North India	INSIDE INDIA	No		Lack of exposure/information
85	Male	18-20	UG	3rd Year	West India	INSIDE INDIA	Yes	Social media		No	Yes	Patient assessment and monitoring through telehealth		Agree	Agree	Agree	Agree	Agree	Agree	Agree	Agree	Agree	Agree	Neutral	Strongly Disagree	Agree	Agree	Agree	Agree	Agree	Agree	Agree	Strongly Disagree	Agree	Strongly Disagree	Strongly Disagree	Strongly Disagree	Neutral	Neutral	Agree	Agree	Agree	Agree	Agree	Agree	Neutral	Neutral	Neutral
86	Male	18-20	UG	3rd Year	North India	INSIDE INDIA	Yes	Research articles		Yes	No		Prefer traditional in-person instruction	Neutral	Neutral	Agree	Disagree	Agree	Disagree	Agree	Agree	Disagree	Agree	Neutral	Strongly Disagree	Agree	Agree	Disagree	Disagree	Disagree	Strongly Disagree	Agree	Disagree	Agree	Disagree	Agree	Agree	Neutral	Agree	Disagree	Agree	Disagree	Agree	Disagree	Agree	Disagree	Neutral	Agree
87	Male	18-20	UG	2nd Year	North East India	INSIDE INDIA	Yes	Social media		Yes	Yes	Practical application of telerehabilitation techniques		Neutral	Neutral	Neutral	Neutral	Neutral	Neutral	Neutral	Neutral	Neutral	Neutral	Neutral	Strongly Disagree	Strongly Disagree	Agree	Strongly Disagree	Strongly Disagree	Strongly Disagree	Strongly Disagree	Strongly Disagree	Strongly Disagree	Strongly Disagree	Strongly Disagree	Strongly Disagree	Strongly Disagree	Neutral	Neutral	Neutral	Strongly Disagree	Strongly Disagree	Neutral	Neutral	Neutral	Neutral	Neutral	Neutral
88	Female	21-25	UG	3rd Year	South India	INSIDE INDIA	No		Lack of exposure/information
89	Male	18-20	UG	3rd Year	North India	INSIDE INDIA	Yes	Social media		No	Yes	Practical application of telerehabilitation techniques		Neutral	Agree	Agree	Agree	Agree	Neutral	Agree	Agree	Agree	Agree	Agree	Agree	Agree	Agree	Strongly Disagree	Strongly Disagree	Agree	Agree	Agree	Agree	Agree	Agree	Agree	Agree	Neutral	Agree	Agree	Agree	Agree	Agree	Neutral	Neutral	Agree	Agree	Agree
90	Male	18-20	UG	3rd Year	East India	INSIDE INDIA	Yes	Research articles		No	Yes	Patient assessment and monitoring through telehealth		Neutral	Neutral	Neutral	Agree	Agree	Agree	Neutral	Neutral	Agree	Agree	Agree	Agree	Agree	Agree	Agree	Agree	Strongly Disagree	Strongly Disagree	Agree	Agree	Agree	Strongly Disagree	Strongly Disagree	Disagree	Neutral	Neutral	Agree	Agree	Strongly Disagree	Agree	Agree	Neutral	Agree	Agree	Agree
91	Female	18-20	UG	3rd Year	North India	INSIDE INDIA	No		Limited interest in healthcare topics
92	Male	18-20	UG	3rd Year	East India	INSIDE INDIA	Yes	Research articles		Yes	Yes	Practical application of telerehabilitation techniques		Neutral	Agree	Neutral	Agree	Agree	Neutral	Neutral	Neutral	Neutral	Neutral	Neutral	Agree	Strongly Disagree	Agree	Strongly Disagree	Agree	Strongly Disagree	Strongly Disagree	Agree	Agree	Agree	Agree	Agree	Agree	Agree	Neutral	Agree	Agree	Agree	Agree	Neutral	Neutral	Agree	Agree	Agree
93	Female	18-20	UG	3rd Year	South India	INSIDE INDIA	Yes	Research articles		No	Yes	Patient assessment and monitoring through telehealth		Neutral	Agree	Agree	Neutral	Disagree	Disagree	Agree	Agree	Neutral	Neutral	Agree	Strongly Disagree	Agree	Agree	Strongly Disagree	Agree	Agree	Disagree	Disagree	Strongly Disagree	Strongly Disagree	Strongly Disagree	Strongly Disagree	Strongly Disagree	Agree	Neutral	Agree	Agree	Strongly Disagree	Neutral	Neutral	Strongly Disagree	Neutral	Agree	Agree
94	Female	18-20	UG	3rd Year	North India	INSIDE INDIA	Yes	Research articles		No	Yes	Patient assessment and monitoring through telehealth		Agree	Agree	Agree	Agree	Agree	Agree	Agree	Agree	Strongly Agree	Disagree	Disagree	Agree	Strongly Disagree	Agree	Agree	Agree	Disagree	Agree	Strongly Disagree	Disagree	Agree	Agree	Agree	Agree	Agree	Neutral	Neutral	Strongly Disagree	Agree	Agree	Neutral	Agree	Neutral	Neutral	Agree
95	Male	18-20	UG	3rd Year	West India	INSIDE INDIA	Yes	Research articles		No	Yes	Practical application of telerehabilitation techniques		Neutral	Neutral	Neutral	Agree	Agree	Neutral	Disagree	Neutral	Agree	Neutral	Agree	Strongly Disagree	Strongly Disagree	Disagree	Agree	Agree	Strongly Disagree	Agree	Disagree	Strongly Disagree	Agree	Agree	Disagree	Strongly Disagree	Neutral	Neutral	Agree	Strongly Disagree	Disagree	Neutral	Neutral	Neutral	Neutral	Agree	Agree
96	Female	18-20	UG	3rd Year	East India	INSIDE INDIA	Yes	Research articles		No	Yes	Patient assessment and monitoring through telehealth		Neutral	Neutral	Agree	Disagree	Disagree	Agree	Agree	Agree	Agree	Agree	Agree	Agree	Agree	Agree	Agree	Agree	Agree	Agree	Agree	Agree	Agree	Agree	Agree	Agree	Agree	Agree	Agree	Agree	Agree	Agree	Agree	Agree	Agree	Agree	Agree
97	Female	18-20	UG	3rd Year	North India	INSIDE INDIA	Yes	Research articles		No	Yes	Practical application of telerehabilitation techniques		Neutral	Agree	Agree	Agree	Neutral	Neutral	Agree	Agree	Agree	Neutral	Neutral	Strongly Disagree	Agree	Agree	Agree	Agree	Agree	Agree	Agree	Strongly Disagree	Agree	Agree	Agree	Strongly Disagree	Neutral	Neutral	Neutral	Agree	Strongly Disagree	Agree	Agree	Neutral	Agree	Agree	Agree
98	Female	18-20	UG	4th Year	North India	INSIDE INDIA	No		Lack of exposure/information
99	Female	18-20	UG	3rd Year	East India	INSIDE INDIA	No		Lack of exposure/information
100	Male	18-20	UG	3rd Year	Southeast Asia	OUTSIDE INDIA	Yes	Academic courses		Yes	No		Already knowledgeable on the subject	Strongly Agree	Neutral	Neutral	Neutral	Neutral	Neutral	Neutral	Neutral	Neutral	Neutral	Neutral	Strongly Disagree	Strongly Disagree	Agree	Strongly Disagree	Strongly Disagree	Strongly Disagree	Strongly Disagree	Strongly Disagree	Strongly Disagree	Strongly Disagree	Strongly Disagree	Strongly Disagree	Strongly Disagree	Neutral	Neutral	Neutral	Strongly Disagree	Strongly Disagree	Neutral	Neutral	Neutral	Neutral	Neutral	Neutral
101	Male	18-20	UG	4th Year	South Asia	OUTSIDE INDIA	Yes	Research articles		No	Yes	Legal and ethical considerations		Disagree	Disagree	Strongly Agree	Strongly Agree	Neutral	Disagree	Strongly Agree	Strongly Agree	Neutral	Strongly Agree	Disagree	Strongly Disagree	Strongly Agree	Strongly Agree	Strongly Agree	Strongly Disagree	Disagree	Strongly Agree	Strongly Agree	Strongly Disagree	Strongly Disagree	Disagree	Strongly Disagree	Strongly Agree	Strongly Disagree	Strongly Disagree	Neutral	Strongly Disagree	Strongly Disagree	Strongly Disagree	Strongly Disagree	Strongly Disagree	Disagree	Neutral	Disagree
102	Female	21-25	UG	4th Year	Southeast Asia	OUTSIDE INDIA	Yes	Research articles		No	Yes	Patient assessment and monitoring through telehealth		Strongly Agree	Strongly Agree	Strongly Agree	Strongly Agree	Strongly Agree	Strongly Agree	Strongly Agree	Strongly Agree	Neutral	Neutral	Strongly Agree	Strongly Disagree	Strongly Disagree	Agree	Strongly Agree	Strongly Agree	Strongly Disagree	Strongly Disagree	Strongly Disagree	Strongly Disagree	Agree	Strongly Agree	Strongly Agree	Strongly Agree	Disagree	Strongly Disagree	Neutral	Strongly Disagree	Strongly Disagree	Neutral	Neutral	Neutral	Neutral	Strongly Disagree	Neutral
103	Male	18-20	UG	3rd Year	Southeast Asia	OUTSIDE INDIA	Yes	Academic courses		Yes	Yes	Legal and ethical considerations		Strongly Agree	Strongly Agree	Strongly Agree	Strongly Agree	Strongly Agree	Strongly Agree	Strongly Agree	Strongly Agree	Strongly Agree	Strongly Agree	Strongly Agree	Strongly Agree	Strongly Agree	Strongly Agree	Strongly Agree	Strongly Agree	Strongly Agree	Strongly Agree	Strongly Agree	Agree	Agree	Strongly Agree	Strongly Agree	Strongly Agree	Strongly Disagree	Strongly Disagree	Strongly Disagree	Strongly Disagree	Strongly Disagree	Strongly Disagree	Strongly Disagree	Strongly Disagree	Strongly Disagree	Strongly Disagree	Strongly Disagree
104	Female	18-20	UG	3rd Year	Southeast Asia	OUTSIDE INDIA	Yes	Social media		No	Yes	Patient assessment and monitoring through telehealth		Neutral	Neutral	Disagree	Disagree	Disagree	Disagree	Neutral	Strongly Agree	Disagree	Strongly Agree	Disagree	Strongly Disagree	Disagree	Strongly Agree	Strongly Disagree	Strongly Disagree	Disagree	Strongly Disagree	Strongly Agree	Agree	Agree	Strongly Disagree	Strongly Agree	Strongly Disagree	Strongly Disagree	Strongly Disagree	Strongly Disagree	Strongly Disagree	Strongly Disagree	Strongly Disagree	Strongly Disagree	Strongly Disagree	Strongly Disagree	Strongly Disagree	Neutral
105	Male	21-25	PG	1st Year	Southeast Asia	OUTSIDE INDIA	Yes	Academic courses		No	No		Prefer traditional in-person instruction	Neutral	Neutral	Strongly Agree	Disagree	Disagree	Neutral	Strongly Agree	Neutral	Strongly Agree	Disagree	Disagree	Strongly Agree	Strongly Agree	Strongly Agree	Disagree	Strongly Disagree	Disagree	Disagree	Disagree	Disagree	Agree	Strongly Disagree	Strongly Agree	Disagree	Neutral	Disagree	Strongly Disagree	Strongly Disagree	Strongly Disagree	Strongly Disagree	Strongly Disagree	Strongly Disagree	Neutral	Strongly Disagree	Strongly Disagree
106	Female	18-20	UG	3rd Year	Southeast Asia	OUTSIDE INDIA	Yes	Research articles		No	Yes	Practical application of telerehabilitation techniques		Strongly Agree	Strongly Agree	Strongly Agree	Neutral	Disagree	Neutral	Neutral	Strongly Agree	Neutral	Strongly Agree	Disagree	Strongly Agree	Strongly Agree	Strongly Agree	Strongly Agree	Strongly Agree	Strongly Disagree	Strongly Agree	Strongly Agree	Agree	Agree	Strongly Agree	Strongly Agree	Strongly Agree	Strongly Disagree	Strongly Disagree	Strongly Disagree	Strongly Disagree	Strongly Disagree	Strongly Disagree	Strongly Disagree	Strongly Disagree	Strongly Disagree	Strongly Disagree	Strongly Disagree
107	Male	18-20	UG	3rd Year	Southeast Asia	OUTSIDE INDIA	Yes	Research articles		No	Yes	Practical application of telerehabilitation techniques		Neutral	Strongly Agree	Strongly Agree	Neutral	Disagree	Neutral	Strongly Agree	Neutral	Neutral	Disagree	Neutral	Strongly Disagree	Strongly Agree	Agree	Strongly Disagree	Strongly Agree	Disagree	Strongly Disagree	Strongly Disagree	Strongly Disagree	Strongly Disagree	Strongly Disagree	Strongly Agree	Strongly Disagree	Neutral	Disagree	Neutral	Strongly Disagree	Strongly Disagree	Strongly Disagree	Strongly Disagree	Neutral	Strongly Disagree	Strongly Disagree	Neutral
108	Male	18-20	UG	3rd Year	West India	INSIDE INDIA	No		Insufficient educational background
109	Male	18-20	UG	3rd Year	North India	INSIDE INDIA	Yes	Research articles		Yes	Yes	Practical application of telerehabilitation techniques		Neutral	Neutral	Agree	Agree	Agree	Agree	Agree	Agree	Agree	Agree	Neutral	Agree	Agree	Agree	Strongly Disagree	Strongly Disagree	Strongly Disagree	Agree	Agree	Strongly Disagree	Agree	Strongly Disagree	Strongly Disagree	Strongly Disagree	Agree	Agree	Neutral	Strongly Disagree	Agree	Agree	Neutral	Neutral	Agree	Agree	Neutral
110	Female	18-20	UG	3rd Year	North East India	INSIDE INDIA	Yes	Research articles		Yes	Yes	Patient assessment and monitoring through telehealth		Agree	Agree	Agree	Agree	Agree	Agree	Neutral	Agree	Agree	Agree	Agree	Agree	Strongly Disagree	Agree	Agree	Strongly Disagree	Agree	Agree	Agree	Agree	Agree	Agree	Agree	Strongly Disagree	Agree	Agree	Agree	Agree	Agree	Neutral	Agree	Agree	Neutral	Agree	Neutral
111	Male	18-20	UG	3rd Year	Central India	INSIDE INDIA	No		Limited interest in healthcare topics
112	Male	21-25	UG	3rd Year	North India	INSIDE INDIA	No		Lack of exposure/information
113	Female	18-20	UG	3rd Year	Central India	INSIDE INDIA	Yes	Academic courses		Yes	Yes	Practical application of telerehabilitation techniques		Agree	Agree	Neutral	Agree	Agree	Agree	Agree	Agree	Agree	Agree	Agree	Agree	Agree	Agree	Agree	Agree	Agree	Agree	Agree	Strongly Disagree	Agree	Agree	Agree	Agree	Agree	Neutral	Neutral	Agree	Agree	Agree	Neutral	Agree	Agree	Agree	Neutral
114	Female	18-20	UG	3rd Year	East India	INSIDE INDIA	Yes	Research articles		No	No		Already knowledgeable on the subject	Agree	Agree	Neutral	Neutral	Neutral	Neutral	Agree	Neutral	Neutral	Neutral	Neutral	Strongly Disagree	Agree	Agree	Strongly Disagree	Strongly Disagree	Strongly Disagree	Strongly Disagree	Agree	Agree	Strongly Disagree	Strongly Disagree	Strongly Disagree	Strongly Disagree	Neutral	Neutral	Neutral	Strongly Disagree	Strongly Disagree	Neutral	Neutral	Neutral	Neutral	Neutral	Neutral
115	Male	21-25	UG	3rd Year	North East India	INSIDE INDIA	No		Insufficient educational background
116	Male	18-20	UG	3rd Year	North India	INSIDE INDIA	No		Lack of exposure/information
117	Male	21-25	PG	2nd Year	East India	INSIDE INDIA	Yes	Research articles		No	Yes	Patient assessment and monitoring through telehealth		Neutral	Neutral	Neutral	Disagree	Disagree	Disagree	Disagree	Neutral	Neutral	Neutral	Disagree	Agree	Agree	Agree	Agree	Strongly Disagree	Agree	Agree	Strongly Disagree	Strongly Disagree	Agree	Agree	Agree	Agree	Disagree	Neutral	Neutral	Strongly Disagree	Agree	Agree	Neutral	Neutral	Agree	Agree	Agree
118	Male	18-20	UG	3rd Year	South India	INSIDE INDIA	Yes	Academic courses		Yes	Yes	Patient assessment and monitoring through telehealth		Agree	Agree	Agree	Agree	Agree	Agree	Agree	Agree	Agree	Agree	Agree	Agree	Agree	Agree	Agree	Agree	Agree	Agree	Agree	Agree	Agree	Agree	Agree	Agree	Agree	Agree	Agree	Agree	Agree	Agree	Agree	Agree	Agree	Agree	Agree
119	Male	18-20	UG	3rd Year	South India	INSIDE INDIA	No		Lack of exposure/information
120	Male	18-20	UG	3rd Year	South India	INSIDE INDIA	Yes	Academic courses		Yes	No		Not relevant to my career goals	Agree	Agree	Agree	Agree	Agree	Agree	Agree	Agree	Agree	Agree	Agree	Agree	Agree	Agree	Agree	Agree	Agree	Agree	Agree	Agree	Agree	Agree	Agree	Agree	Agree	Agree	Agree	Agree	Agree	Agree	Agree	Agree	Agree	Agree	Agree
121	Male	18-20	UG	3rd Year	South India	INSIDE INDIA	Yes	Academic courses		Yes	Yes	Practical application of telerehabilitation techniques		Agree	Agree	Agree	Agree	Agree	Agree	Agree	Agree	Agree	Agree	Agree	Agree	Agree	Agree	Agree	Agree	Agree	Agree	Agree	Agree	Agree	Agree	Agree	Agree	Agree	Agree	Agree	Agree	Agree	Agree	Agree	Agree	Agree	Agree	Agree
122	Male	18-20	UG	3rd Year	East India	INSIDE INDIA	Yes	Research articles		Yes	Yes	Practical application of telerehabilitation techniques		Agree	Agree	Strongly Disagree	Agree	Agree	Agree	Strongly Disagree	Agree	Agree	Agree	Strongly Disagree	Agree	Agree	Agree	Agree	Agree	Agree	Agree	Agree	Agree	Agree	Agree	Agree	Agree	Agree	Agree	Agree	Agree	Agree	Agree	Agree	Agree	Agree	Agree	Agree
123	Male	18-20	UG	4th Year	West India	INSIDE INDIA	Yes	Academic courses		Yes	Yes	Legal and ethical considerations		Agree	Agree	Agree	Agree	Agree	Agree	Agree	Agree	Agree	Agree	Agree	Agree	Agree	Agree	Agree	Agree	Agree	Agree	Agree	Agree	Agree	Agree	Agree	Agree	Neutral	Agree	Agree	Agree	Agree	Agree	Agree	Agree	Neutral	Neutral	Neutral
124	Male	18-20	UG	3rd Year	Central India	INSIDE INDIA	No		Limited interest in healthcare topics
125	Male	18-20	UG	3rd Year	North India	INSIDE INDIA	Yes	Academic courses		Yes	Yes	Practical application of telerehabilitation techniques		Agree	Agree	Agree	Agree	Agree	Agree	Agree	Agree	Agree	Agree	Agree	Agree	Agree	Agree	Agree	Agree	Agree	Agree	Agree	Agree	Agree	Agree	Agree	Agree	Agree	Agree	Agree	Agree	Agree	Agree	Agree	Agree	Agree	Agree	Agree
126	Male	18-20	UG	3rd Year	North East India	INSIDE INDIA	No		Limited interest in healthcare topics
127	Male	18-20	UG	3rd Year	Central India	INSIDE INDIA	No		Lack of exposure/information
128	Male	18-20	UG	3rd Year	North India	INSIDE INDIA	No		Limited interest in healthcare topics
129	Male	21-25	UG	4th Year	North India	INSIDE INDIA	Yes	Social media		No	Yes	Patient assessment and monitoring through telehealth		Strongly Disagree	Strongly Disagree	Agree	Agree	Agree	Disagree	Agree	Strongly Disagree	Disagree	Strongly Disagree	Strongly Disagree	Strongly Disagree	Strongly Disagree	Agree	Agree	Agree	Strongly Disagree	Strongly Disagree	Strongly Disagree	Agree	Strongly Disagree	Strongly Disagree	Strongly Disagree	Strongly Disagree	Neutral	Disagree	Neutral	Disagree	Strongly Disagree	Agree	Agree	Neutral	Neutral	Agree	Neutral
130	Male	18-20	UG	3rd Year	North India	INSIDE INDIA	No		Lack of exposure/information
131	Male	21-25	UG	3rd Year	North East India	INSIDE INDIA	Yes	Academic courses		Yes	Yes	Practical application of telerehabilitation techniques		Agree	Agree	Agree	Agree	Agree	Agree	Agree	Agree	Agree	Agree	Agree	Agree	Agree	Agree	Agree	Agree	Agree	Agree	Agree	Agree	Agree	Agree	Agree	Agree	Agree	Neutral	Agree	Agree	Agree	Agree	Agree	Agree	Agree	Agree	Agree
132	Male	21-25	UG	3rd Year	North West India	INSIDE INDIA	Yes	Academic courses		Yes	Yes	Understanding telecommunication technologies		Agree	Strongly Disagree	Disagree	Strongly Disagree	Agree	Strongly Disagree	Disagree	Strongly Disagree	Agree	Strongly Disagree	Disagree	Agree	Strongly Disagree	Disagree	Strongly Disagree	Agree	Disagree	Agree	Strongly Disagree	Strongly Disagree	Disagree	Agree	Strongly Disagree	Agree	Neutral	Disagree	Agree	Agree	Strongly Disagree	Disagree	Disagree	Agree	Neutral	Disagree	Agree
133	Male	21-25	UG	4th Year	North India	INSIDE INDIA	Yes	Academic courses		Yes	Yes	Practical application of telerehabilitation techniques		Agree	Strongly Disagree	Agree	Strongly Disagree	Agree	Strongly Disagree	Agree	Strongly Disagree	Agree	Strongly Disagree	Agree	Agree	Strongly Disagree	Agree	Agree	Agree	Agree	Agree	Agree	Agree	Agree	Agree	Agree	Agree	Agree	Agree	Agree	Agree	Agree	Agree	Agree	Agree	Agree	Neutral	Agree
134	Male	21-25	UG	4th Year	East India	INSIDE INDIA	Yes	Academic courses		Yes	Yes	Practical application of telerehabilitation techniques		Agree	Agree	Agree	Agree	Agree	Agree	Agree	Agree	Agree	Agree	Agree	Agree	Agree	Agree	Agree	Agree	Agree	Agree	Agree	Agree	Agree	Agree	Agree	Agree	Agree	Agree	Agree	Agree	Agree	Agree	Agree	Agree	Agree	Agree	Agree
135	Female	18-20	UG	3rd Year	North India	INSIDE INDIA	No		Lack of exposure/information
136	Male	21-25	UG	3rd Year	West India	INSIDE INDIA	Yes	Academic courses		Yes	Yes	Understanding telecommunication technologies		Agree	Agree	Agree	Agree	Agree	Agree	Agree	Agree	Agree	Agree	Agree	Agree	Agree	Agree	Agree	Agree	Agree	Agree	Agree	Agree	Agree	Agree	Agree	Agree	Agree	Agree	Agree	Agree	Agree	Agree	Agree	Agree	Agree	Agree	Agree
137	Female	21-25	UG	4th Year	Middle East	OUTSIDE INDIA	Yes	Social media		No	Yes	Practical application of telerehabilitation techniques		Agree	Agree	Disagree	Agree	Disagree	Disagree	Strongly Disagree	Agree	Disagree	Strongly Disagree	Disagree	Strongly Disagree	Strongly Disagree	Agree	Agree	Agree	Strongly Disagree	Agree	Strongly Disagree	Strongly Disagree	Agree	Strongly Disagree	Strongly Disagree	Disagree	Neutral	Disagree	Neutral	Strongly Disagree	Agree	Neutral	Disagree	Neutral	Agree	Agree	Agree
138	Female	21-25	UG	4th Year	South India	INSIDE INDIA	No		Insufficient educational background
139	Female	18-20	UG	3rd Year	South India	INSIDE INDIA	No		Limited interest in healthcare topics
140	Male	21-25	UG	3rd Year	South India	INSIDE INDIA	Yes	Academic courses		Yes	Yes	Practical application of telerehabilitation techniques		Agree	Strongly Disagree	Agree	Agree	Agree	Agree	Agree	Agree	Agree	Agree	Agree	Agree	Agree	Agree	Agree	Agree	Agree	Agree	Agree	Agree	Agree	Agree	Agree	Agree	Agree	Agree	Agree	Agree	Agree	Agree	Agree	Agree	Agree	Agree	Agree
141	Female	21-25	UG	3rd Year	South India	INSIDE INDIA	No		Insufficient educational background
142	Male	21-25	PG	1st Year	South India	INSIDE INDIA	Yes	Research articles		Yes	No		Prefer traditional in-person instruction	Agree	Strongly Disagree	Agree	Strongly Disagree	Agree	Agree	Agree	Agree	Agree	Agree	Agree	Agree	Agree	Agree	Agree	Agree	Strongly Disagree	Agree	Disagree	Disagree	Strongly Disagree	Strongly Disagree	Disagree	Strongly Disagree	Agree	Agree	Agree	Disagree	Strongly Disagree	Disagree	Disagree	Strongly Disagree	Neutral	Neutral	Agree
143	Female	18-20	UG	4th Year	South India	INSIDE INDIA	No		Insufficient educational background
144	Male	18-20	UG	4th Year	North East India	INSIDE INDIA	No		Limited interest in healthcare topics
145	Female	18-20	UG	3rd Year	East India	INSIDE INDIA	No		Lack of exposure/information
146	Male	21-25	UG	4th Year	South India	INSIDE INDIA	No		Insufficient educational background
147	Female	18-20	UG	3rd Year	West India	INSIDE INDIA	No		Insufficient educational background
148	Male	21-25	UG	Intern	North India	INSIDE INDIA	No		Lack of exposure/information
149	Male	21-25	UG	4th Year	North India	INSIDE INDIA	Yes	Research articles		No	Yes	Practical application of telerehabilitation techniques		Strongly Disagree	Agree	Agree	Agree	Agree	Disagree	Agree	Agree	Agree	Agree	Agree	Agree	Agree	Agree	Agree	Agree	Agree	Agree	Agree	Agree	Agree	Agree	Agree	Agree	Agree	Agree	Agree	Agree	Agree	Agree	Agree	Neutral	Agree	Agree	Agree
150	Male	21-25	UG	4th Year	North India	INSIDE INDIA	No		Lack of exposure/information
151	Male	21-25	PG	2nd Year	East India	INSIDE INDIA	Yes	Academic courses		Yes	Yes	Legal and ethical considerations		Strongly Agree	Strongly Agree	Strongly Agree	Strongly Agree	Strongly Disagree	Strongly Disagree	Strongly Agree	Strongly Disagree	Strongly Agree	Strongly Disagree	Strongly Agree	Strongly Disagree	Strongly Disagree	Agree	Strongly Agree	Strongly Agree	Strongly Disagree	Strongly Disagree	Strongly Disagree	Agree	Agree	Strongly Agree	Strongly Agree	Strongly Agree	Strongly Disagree	Strongly Disagree	Strongly Disagree	Strongly Disagree	Strongly Disagree	Strongly Disagree	Neutral	Strongly Disagree	Strongly Disagree	Neutral	Strongly Disagree
152	Male	21-25	PG	1st Year	South India	INSIDE INDIA	Yes	Academic courses		Yes	Yes	Patient assessment and monitoring through telehealth		Strongly Agree	Strongly Agree	Strongly Agree	Strongly Agree	Strongly Disagree	Strongly Disagree	Strongly Agree	Strongly Disagree	Strongly Disagree	Strongly Agree	Strongly Agree	Disagree	Strongly Agree	Strongly Agree	Strongly Disagree	Strongly Agree	Disagree	Disagree	Strongly Disagree	Strongly Disagree	Agree	Strongly Agree	Strongly Agree	Strongly Agree	Strongly Disagree	Strongly Disagree	Strongly Disagree	Strongly Disagree	Strongly Disagree	Strongly Disagree	Strongly Disagree	Strongly Disagree	Strongly Disagree	Strongly Disagree	Strongly Disagree
153	Male	21-25	PG	1st Year	South India	INSIDE INDIA	Yes	Social media		Yes	Yes	Practical application of telerehabilitation techniques		Strongly Agree	Strongly Agree	Strongly Agree	Strongly Agree	Strongly Agree	Strongly Agree	Strongly Agree	Strongly Agree	Strongly Agree	Strongly Agree	Strongly Agree	Strongly Agree	Strongly Agree	Strongly Agree	Strongly Agree	Strongly Agree	Strongly Agree	Strongly Disagree	Strongly Disagree	Strongly Disagree	Strongly Disagree	Strongly Disagree	Strongly Disagree	Strongly Disagree	Strongly Disagree	Strongly Disagree	Strongly Disagree	Strongly Disagree	Strongly Disagree	Neutral	Neutral	Neutral	Neutral	Neutral	Neutral
154	Female	21-25	PG	2nd Year	South India	INSIDE INDIA	Yes	Workshops or seminars		No	Yes	Patient assessment and monitoring through telehealth		Strongly Disagree	Strongly Agree	Strongly Disagree	Strongly Agree	Strongly Disagree	Disagree	Strongly Agree	Strongly Agree	Disagree	Strongly Agree	Disagree	Strongly Agree	Strongly Agree	Agree	Strongly Agree	Strongly Agree	Strongly Disagree	Strongly Disagree	Strongly Agree	Agree	Agree	Strongly Agree	Strongly Agree	Strongly Disagree	Strongly Disagree	Strongly Disagree	Strongly Disagree	Strongly Disagree	Strongly Disagree	Strongly Disagree	Neutral	Strongly Disagree	Neutral	Strongly Disagree	Neutral
155	Male	21-25	PG	1st Year	Central India	INSIDE INDIA	Yes	Research articles		Yes	Yes	Practical application of telerehabilitation techniques		Strongly Agree	Strongly Agree	Strongly Disagree	Strongly Agree	Strongly Agree	Strongly Agree	Strongly Agree	Strongly Agree	Strongly Disagree	Strongly Agree	Strongly Agree	Strongly Disagree	Strongly Disagree	Strongly Agree	Strongly Agree	Strongly Agree	Strongly Agree	Strongly Agree	Strongly Agree	Strongly Disagree	Agree	Strongly Disagree	Strongly Disagree	Strongly Agree	Strongly Disagree	Strongly Disagree	Strongly Disagree	Strongly Disagree	Strongly Disagree	Neutral	Neutral	Strongly Disagree	Neutral	Neutral	Strongly Disagree
156	Female	21-25	PG	1st Year	West India	INSIDE INDIA	No		Lack of exposure/information
157	Male	21-25	PG	2nd Year	East India	INSIDE INDIA	Yes	Research articles		No	No		Prefer traditional in-person instruction	Agree	Agree	Agree	Agree	Agree	Agree	Agree	Agree	Agree	Agree	Agree	Agree	Agree	Agree	Agree	Agree	Agree	Agree	Agree	Agree	Agree	Agree	Agree	Agree	Agree	Agree	Agree	Agree	Agree	Agree	Agree	Agree	Agree	Agree	Agree
158	Female	21-25	PG	1st Year	South India	INSIDE INDIA	No		Lack of exposure/information
159	Female	21-25	UG	4th Year	South India	INSIDE INDIA	Yes	Research articles		No	Yes	Practical application of telerehabilitation techniques		Agree	Agree	Strongly Disagree	Disagree	Agree	Agree	Agree	Agree	Agree	Agree	Agree	Agree	Agree	Agree	Agree	Agree	Agree	Agree	Agree	Agree	Agree	Agree	Agree	Agree	Agree	Agree	Agree	Agree	Agree	Agree	Disagree	Agree	Agree	Agree	Agree
160	Male	21-25	PG	2nd Year	South India	INSIDE INDIA	No		Insufficient educational background
161	Female	21-25	UG	3rd Year	South India	INSIDE INDIA	Yes	Academic courses		Yes	Yes	Understanding telecommunication technologies		Agree	Agree	Agree	Agree	Agree	Agree	Agree	Agree	Agree	Agree	Agree	Agree	Agree	Agree	Agree	Agree	Agree	Agree	Agree	Agree	Agree	Agree	Agree	Agree	Agree	Agree	Neutral	Agree	Agree	Agree	Agree	Agree	Agree	Agree	Agree
162	Female	21-25	PG	3rd Year	South India	INSIDE INDIA	No		Lack of exposure/information
163	Male	18-20	UG	3rd Year	South Asia	OUTSIDE INDIA	Yes	Social media		Yes	Yes	Legal and ethical considerations		Strongly Disagree	Strongly Agree	Strongly Agree	Strongly Agree	Strongly Agree	Strongly Disagree	Strongly Agree	Strongly Disagree	Strongly Disagree	Strongly Agree	Strongly Agree	Strongly Disagree	Strongly Disagree	Strongly Agree	Strongly Agree	Strongly Agree	Strongly Disagree	Strongly Agree	Strongly Agree	Agree	Agree	Strongly Agree	Strongly Agree	Strongly Agree	Strongly Disagree	Neutral	Strongly Disagree	Strongly Disagree	Strongly Disagree	Strongly Disagree	Strongly Disagree	Strongly Disagree	Strongly Disagree	Strongly Disagree	Strongly Disagree
164	Female	21-25	UG	Intern	South Asia	OUTSIDE INDIA	Yes	Academic courses		Yes	Yes	Patient assessment and monitoring through telehealth		Strongly Agree	Strongly Agree	Strongly Agree	Strongly Agree	Strongly Agree	Strongly Agree	Strongly Agree	Strongly Agree	Strongly Agree	Strongly Agree	Strongly Agree	Strongly Agree	Strongly Agree	Strongly Agree	Strongly Agree	Strongly Agree	Strongly Agree	Strongly Agree	Strongly Agree	Agree	Agree	Strongly Agree	Strongly Agree	Strongly Agree	Strongly Disagree	Strongly Disagree	Strongly Disagree	Strongly Disagree	Strongly Disagree	Strongly Disagree	Strongly Disagree	Strongly Disagree	Strongly Disagree	Strongly Disagree	Strongly Disagree
165	Female	21-25	PG	2nd Year	Southeast Asia	OUTSIDE INDIA	Yes	Social media		No	Yes	Practical application of telerehabilitation techniques		Strongly Agree	Strongly Agree	Strongly Agree	Strongly Agree	Strongly Disagree	Disagree	Strongly Agree	Strongly Agree	Strongly Agree	Strongly Agree	Strongly Agree	Strongly Agree	Strongly Agree	Strongly Agree	Strongly Agree	Strongly Agree	Disagree	Strongly Disagree	Strongly Agree	Agree	Strongly Disagree	Strongly Agree	Strongly Agree	Strongly Disagree	Strongly Disagree	Neutral	Strongly Disagree	Strongly Disagree	Strongly Disagree	Strongly Disagree	Strongly Disagree	Strongly Disagree	Neutral	Strongly Disagree	Strongly Disagree
166	Female	21-25	UG	4th Year	Southeast Asia	OUTSIDE INDIA	Yes	Academic courses		Yes	Yes	Practical application of telerehabilitation techniques		Strongly Agree	Strongly Agree	Strongly Agree	Strongly Agree	Strongly Agree	Strongly Agree	Strongly Agree	Strongly Agree	Strongly Agree	Strongly Agree	Strongly Agree	Strongly Agree	Strongly Agree	Strongly Agree	Strongly Agree	Strongly Agree	Strongly Agree	Strongly Agree	Strongly Agree	Agree	Agree	Strongly Agree	Strongly Agree	Strongly Agree	Strongly Disagree	Strongly Disagree	Strongly Disagree	Strongly Disagree	Strongly Disagree	Strongly Disagree	Strongly Disagree	Strongly Disagree	Strongly Disagree	Strongly Disagree	Strongly Disagree
167	Female	21-25	PG	3rd Year	Southeast Asia	OUTSIDE INDIA	Yes	Workshops or seminars		No	Yes	Practical application of telerehabilitation techniques		Strongly Disagree	Strongly Agree	Strongly Disagree	Strongly Agree	Disagree	Strongly Disagree	Strongly Agree	Strongly Disagree	Disagree	Strongly Agree	Strongly Disagree	Disagree	Strongly Disagree	Agree	Strongly Agree	Strongly Agree	Disagree	Strongly Agree	Strongly Agree	Strongly Disagree	Strongly Disagree	Strongly Agree	Strongly Agree	Strongly Disagree	Strongly Disagree	Strongly Disagree	Strongly Disagree	Strongly Disagree	Strongly Disagree	Strongly Disagree	Strongly Disagree	Strongly Disagree	Strongly Disagree	Strongly Disagree	Strongly Disagree
168	Male	21-25	PG	2nd Year	Middle East	OUTSIDE INDIA	Yes	Workshops or seminars		No	Yes	Patient assessment and monitoring through telehealth		Strongly Agree	Strongly Agree	Strongly Agree	Strongly Agree	Strongly Disagree	Disagree	Strongly Disagree	Strongly Agree	Strongly Disagree	Strongly Agree	Strongly Disagree	Strongly Disagree	Strongly Disagree	Strongly Agree	Strongly Agree	Strongly Disagree	Strongly Disagree	Strongly Agree	Strongly Agree	Agree	Agree	Strongly Disagree	Strongly Agree	Strongly Disagree	Strongly Disagree	Strongly Disagree	Strongly Disagree	Strongly Disagree	Strongly Disagree	Neutral	Disagree	Neutral	Strongly Disagree	Strongly Disagree	Neutral
169	Female	21-25	PG	1st Year	Oceania	OUTSIDE INDIA	Yes	Research articles		No	Yes	Practical application of telerehabilitation techniques		Strongly Disagree	Strongly Agree	Strongly Disagree	Strongly Agree	Strongly Agree	Strongly Agree	Strongly Agree	Strongly Agree	Strongly Agree	Strongly Agree	Strongly Agree	Strongly Disagree	Strongly Agree	Strongly Agree	Strongly Disagree	Strongly Agree	Strongly Agree	Strongly Agree	Disagree	Strongly Disagree	Agree	Strongly Agree	Strongly Agree	Strongly Disagree	Disagree	Neutral	Strongly Disagree	Strongly Disagree	Strongly Disagree	Neutral	Strongly Disagree	Neutral	Neutral	Neutral	Strongly Disagree
170	Female	21-25	UG	3rd Year	North India	INSIDE INDIA	No		Lack of exposure/information
171	Male	21-25	UG	3rd Year	South India	INSIDE INDIA	No		Insufficient educational background
172	Male	21-25	UG	4th Year	South India	INSIDE INDIA	No		Lack of exposure/information
173	Female	21-25	UG	4th Year	South India	INSIDE INDIA	No		Limited interest in healthcare topics
174	Male	21-25	UG	4th Year	North India	INSIDE INDIA	No		Limited interest in healthcare topics
175	Male	18-20	UG	3rd Year	North India	INSIDE INDIA	Yes	Research articles		Yes	No		Already knowledgeable on the subject	Agree	Strongly Disagree	Strongly Disagree	Disagree	Disagree	Agree	Strongly Disagree	Disagree	Disagree	Agree	Disagree	Disagree	Disagree	Disagree	Agree	Disagree	Disagree	Strongly Disagree	Disagree	Disagree	Agree	Agree	Agree	Strongly Disagree	Agree	Disagree	Neutral	Disagree	Strongly Disagree	Agree	Agree	Neutral	Neutral	Agree	Agree
176	Male	>25	UG	4th Year	West India	INSIDE INDIA	No		Insufficient educational background
177	Male	21-25	UG	4th Year	East India	INSIDE INDIA	No		Lack of exposure/information
178	Female	21-25	UG	4th Year	East India	INSIDE INDIA	No		Lack of exposure/information
179	Female	>25	UG	4th Year	Central India	INSIDE INDIA	No		Insufficient educational background
180	Male	21-25	UG	4th Year	North East India	INSIDE INDIA	No		Lack of exposure/information
181	Female	18-20	UG	4th Year	West India	INSIDE INDIA	No		Lack of exposure/information
182	Male	21-25	PG	2nd Year	East India	INSIDE INDIA	Yes	Workshops or seminars		No	Yes	Patient assessment and monitoring through telehealth		Strongly Disagree	Disagree	Agree	Agree	Agree	Disagree	Agree	Strongly Disagree	Agree	Strongly Disagree	Disagree	Strongly Disagree	Agree	Strongly Disagree	Strongly Disagree	Agree	Disagree	Strongly Disagree	Agree	Strongly Disagree	Agree	Agree	Agree	Disagree	Agree	Agree	Agree	Strongly Disagree	Strongly Disagree	Agree	Disagree	Neutral	Agree	Agree	Agree
183	Male	21-25	PG	2nd Year	South India	INSIDE INDIA	No		Lack of exposure/information
184	Male	21-25	UG	4th Year	North India	INSIDE INDIA	Yes	Academic courses		Yes	Yes	Practical application of telerehabilitation techniques		Agree	Agree	Agree	Disagree	Agree	Disagree	Agree	Strongly Disagree	Agree	Agree	Agree	Strongly Disagree	Strongly Disagree	Disagree	Disagree	Disagree	Disagree	Disagree	Disagree	Disagree	Disagree	Disagree	Disagree	Disagree	Disagree	Disagree	Disagree	Disagree	Disagree	Disagree	Disagree	Strongly Disagree	Disagree	Disagree	Disagree
185	Female	21-25	PG	2nd Year	South India	INSIDE INDIA	Yes	Workshops or seminars		No	Yes	Practical application of telerehabilitation techniques		Strongly Disagree	Agree	Agree	Agree	Agree	Agree	Agree	Agree	Disagree	Agree	Agree	Agree	Agree	Strongly Disagree	Agree	Agree	Strongly Disagree	Agree	Agree	Agree	Agree	Agree	Agree	Agree	Agree	Neutral	Agree	Strongly Disagree	Strongly Disagree	Neutral	Neutral	Neutral	Neutral	Agree	Agree
186	Female	21-25	UG	3rd Year	South India	INSIDE INDIA	No		Lack of exposure/information
187	Male	21-25	UG	3rd Year	South India	INSIDE INDIA	No		Limited interest in healthcare topics
188	Female	21-25	UG	3rd Year	West India	INSIDE INDIA	No		Insufficient educational background
189	Female	21-25	UG	3rd Year	North India	INSIDE INDIA	No		Lack of exposure/information
190	Female	21-25	UG	4th Year	East India	INSIDE INDIA	No		Limited interest in healthcare topics
191	Male	21-25	UG	4th Year	Central India	INSIDE INDIA	No		Limited interest in healthcare topics
192	Female	21-25	UG	4th Year	East India	INSIDE INDIA	No		Lack of exposure/information
193	Female	21-25	PG	1st Year	North India	INSIDE INDIA	No		Lack of exposure/information
194	Female	21-25	PG	1st Year	North East India	INSIDE INDIA	Yes	Research articles		Yes	Yes	Patient assessment and monitoring through telehealth		Strongly Disagree	Strongly Disagree	Strongly Agree	Strongly Disagree	Strongly Disagree	Strongly Disagree	Strongly Disagree	Strongly Agree	Strongly Disagree	Strongly Disagree	Strongly Disagree	Strongly Disagree	Strongly Disagree	Strongly Agree	Agree	Strongly Agree	Strongly Disagree	Strongly Disagree	Strongly Agree	Agree	Agree	Strongly Agree	Strongly Agree	Strongly Disagree	Strongly Disagree	Neutral	Strongly Disagree	Strongly Disagree	Strongly Disagree	Strongly Disagree	Strongly Disagree	Neutral	Strongly Disagree	Strongly Disagree	Strongly Disagree
195	Female	21-25	PG	1st Year	West India	INSIDE INDIA	Yes	Research articles		No	Yes	Practical application of telerehabilitation techniques		Strongly Agree	Strongly Disagree	Strongly Disagree	Strongly Disagree	Strongly Disagree	Strongly Disagree	Strongly Disagree	Strongly Agree	Strongly Disagree	Strongly Disagree	Strongly Disagree	Strongly Disagree	Strongly Agree	Agree	Agree	Strongly Agree	Strongly Disagree	Strongly Disagree	Strongly Disagree	Strongly Disagree	Agree	Strongly Agree	Strongly Agree	Strongly Disagree	Strongly Disagree	Neutral	Strongly Disagree	Strongly Disagree	Strongly Disagree	Strongly Disagree	Neutral	Neutral	Strongly Disagree	Strongly Disagree	Strongly Disagree
196	Male	21-25	PG	1st Year	South India	INSIDE INDIA	Yes	Social media		No	Yes	Patient assessment and monitoring through telehealth		Strongly Disagree	Strongly Agree	Strongly Agree	Strongly Agree	Strongly Disagree	Strongly Disagree	Strongly Disagree	Strongly Disagree	Strongly Disagree	Strongly Disagree	Strongly Disagree	Strongly Agree	Strongly Agree	Strongly Agree	Strongly Agree	Strongly Agree	Strongly Disagree	Strongly Agree	Strongly Agree	Agree	Agree	Strongly Agree	Strongly Agree	Strongly Disagree	Strongly Disagree	Strongly Disagree	Strongly Disagree	Strongly Disagree	Strongly Disagree	Strongly Disagree	Neutral	Strongly Disagree	Neutral	Strongly Disagree	Neutral
197	Male	21-25	PG	1st Year	East India	INSIDE INDIA	Yes	Social media		No	Yes	Practical application of telerehabilitation techniques		Strongly Agree	Strongly Agree	Strongly Agree	Strongly Agree	Strongly Agree	Strongly Agree	Strongly Agree	Strongly Agree	Strongly Agree	Strongly Agree	Strongly Agree	Strongly Agree	Strongly Disagree	Agree	Agree	Strongly Disagree	Strongly Disagree	Strongly Disagree	Strongly Disagree	Agree	Agree	Strongly Agree	Strongly Agree	Strongly Agree	Strongly Disagree	Strongly Disagree	Strongly Disagree	Strongly Disagree	Strongly Disagree	Strongly Disagree	Strongly Disagree	Strongly Disagree	Strongly Disagree	Strongly Disagree	Strongly Disagree
198	Male	21-25	PG	1st Year	North India	INSIDE INDIA	Yes	Research articles		Yes	Yes	Patient assessment and monitoring through telehealth		Strongly Agree	Strongly Disagree	Strongly Agree	Strongly Agree	Strongly Disagree	Strongly Disagree	Strongly Disagree	Strongly Agree	Strongly Disagree	Strongly Disagree	Strongly Disagree	Strongly Disagree	Strongly Disagree	Strongly Agree	Agree	Strongly Agree	Strongly Disagree	Strongly Agree	Strongly Disagree	Strongly Disagree	Agree	Strongly Agree	Strongly Agree	Strongly Agree	Strongly Disagree	Strongly Disagree	Strongly Disagree	Strongly Disagree	Strongly Disagree	Strongly Disagree	Strongly Disagree	Strongly Disagree	Strongly Disagree	Neutral	Neutral
199	Female	21-25	PG	1st Year	West India	INSIDE INDIA	Yes	Social media		No	Yes	Patient assessment and monitoring through telehealth		Strongly Disagree	Strongly Agree	Strongly Disagree	Strongly Agree	Strongly Disagree	Strongly Disagree	Strongly Agree	Strongly Agree	Strongly Disagree	Strongly Disagree	Strongly Disagree	Strongly Agree	Strongly Disagree	Strongly Agree	Strongly Agree	Strongly Agree	Strongly Disagree	Strongly Agree	Strongly Agree	Agree	Agree	Strongly Agree	Strongly Agree	Strongly Agree	Strongly Disagree	Strongly Disagree	Strongly Disagree	Strongly Disagree	Strongly Disagree	Strongly Disagree	Neutral	Strongly Disagree	Strongly Disagree	Strongly Disagree	Strongly Disagree
200	Female	21-25	PG	1st Year	West India	INSIDE INDIA	Yes	Social media		No	Yes	Practical application of telerehabilitation techniques		Strongly Disagree	Strongly Disagree	Strongly Agree	Strongly Disagree	Strongly Disagree	Strongly Agree	Strongly Disagree	Strongly Agree	Strongly Agree	Strongly Disagree	Strongly Agree	Strongly Agree	Strongly Agree	Strongly Agree	Strongly Agree	Strongly Agree	Strongly Agree	Strongly Agree	Strongly Agree	Agree	Agree	Strongly Agree	Strongly Agree	Strongly Agree	Strongly Disagree	Strongly Disagree	Strongly Disagree	Strongly Disagree	Strongly Disagree	Strongly Disagree	Strongly Disagree	Strongly Disagree	Strongly Disagree	Neutral	Strongly Disagree
201	Female	21-25	PG	1st Year	West India	INSIDE INDIA	Yes	Social media		Yes	Yes	Patient assessment and monitoring through telehealth		Strongly Agree	Strongly Disagree	Strongly Agree	Strongly Agree	Strongly Agree	Strongly Disagree	Strongly Disagree	Strongly Agree	Strongly Agree	Strongly Agree	Strongly Agree	Strongly Agree	Strongly Disagree	Agree	Agree	Strongly Disagree	Strongly Disagree	Strongly Agree	Strongly Agree	Agree	Strongly Disagree	Strongly Disagree	Strongly Disagree	Strongly Agree	Neutral	Strongly Disagree	Strongly Disagree	Strongly Disagree	Strongly Disagree	Strongly Disagree	Neutral	Strongly Disagree	Neutral	Strongly Disagree	Neutral
202	Female	21-25	PG	1st Year	West India	INSIDE INDIA	Yes	Research articles		No	Yes	Practical application of telerehabilitation techniques		Strongly Disagree	Strongly Agree	Strongly Agree	Strongly Agree	Strongly Disagree	Strongly Disagree	Strongly Agree	Strongly Agree	Strongly Disagree	Strongly Agree	Strongly Disagree	Strongly Disagree	Strongly Disagree	Strongly Agree	Agree	Strongly Agree	Strongly Disagree	Strongly Disagree	Strongly Disagree	Agree	Agree	Strongly Agree	Strongly Agree	Strongly Disagree	Strongly Disagree	Neutral	Strongly Disagree	Strongly Disagree	Strongly Disagree	Strongly Disagree	Strongly Disagree	Strongly Disagree	Strongly Disagree	Neutral	Strongly Disagree
203	Female	21-25	PG	1st Year	East India	INSIDE INDIA	Yes	Research articles		No	Yes	Practical application of telerehabilitation techniques		Strongly Agree	Strongly Agree	Strongly Agree	Strongly Disagree	Strongly Disagree	Strongly Disagree	Strongly Disagree	Strongly Agree	Strongly Agree	Strongly Agree	Strongly Disagree	Strongly Agree	Strongly Agree	Strongly Agree	Strongly Agree	Strongly Agree	Strongly Agree	Strongly Agree	Strongly Agree	Agree	Agree	Strongly Agree	Strongly Agree	Strongly Agree	Strongly Agree	Strongly Agree	Strongly Agree	Strongly Agree	Strongly Agree	Strongly Agree	Strongly Agree	Strongly Agree	Strongly Agree	Strongly Agree	Strongly Agree
204	Female	21-25	PG	1st Year	North India	INSIDE INDIA	Yes	Social media		No	Yes	Practical application of telerehabilitation techniques		Strongly Agree	Strongly Agree	Strongly Agree	Strongly Disagree	Strongly Disagree	Strongly Disagree	Strongly Agree	Strongly Agree	Strongly Disagree	Strongly Disagree	Strongly Disagree	Strongly Agree	Strongly Disagree	Strongly Agree	Strongly Agree	Strongly Agree	Strongly Agree	Strongly Agree	Strongly Agree	Agree	Agree	Strongly Disagree	Strongly Disagree	Strongly Agree	Neutral	Neutral	Strongly Agree	Strongly Agree	Strongly Agree	Strongly Agree	Strongly Agree	Neutral	Strongly Agree	Strongly Agree	Strongly Agree
205	Female	21-25	PG	1st Year	South India	INSIDE INDIA	Yes	Social media		No	Yes	Practical application of telerehabilitation techniques		Strongly Disagree	Strongly Disagree	Strongly Disagree	Strongly Disagree	Strongly Disagree	Strongly Disagree	Strongly Disagree	Strongly Disagree	Strongly Disagree	Strongly Disagree	Strongly Disagree	Strongly Disagree	Strongly Disagree	Agree	Agree	Strongly Disagree	Strongly Disagree	Strongly Disagree	Strongly Disagree	Strongly Disagree	Strongly Disagree	Strongly Disagree	Strongly Disagree	Strongly Disagree	Neutral	Neutral	Neutral	Strongly Agree	Strongly Agree	Neutral	Neutral	Neutral	Strongly Agree	Strongly Agree	Strongly Agree
206	Female	21-25	PG	1st Year	North East India	INSIDE INDIA	Yes	Research articles		No	Yes	Patient assessment and monitoring through telehealth		Strongly Agree	Strongly Agree	Strongly Agree	Strongly Agree	Strongly Agree	Strongly Agree	Strongly Agree	Strongly Agree	Strongly Agree	Strongly Agree	Strongly Agree	Strongly Agree	Strongly Agree	Strongly Agree	Strongly Agree	Strongly Agree	Strongly Agree	Strongly Agree	Strongly Agree	Agree	Agree	Strongly Agree	Strongly Agree	Strongly Agree	Strongly Agree	Strongly Agree	Strongly Agree	Strongly Agree	Strongly Agree	Strongly Agree	Strongly Agree	Strongly Agree	Strongly Agree	Strongly Agree	Neutral
207	Female	21-25	PG	1st Year	Central India	INSIDE INDIA	Yes	Research articles		No	Yes	Patient assessment and monitoring through telehealth		Strongly Agree	Strongly Disagree	Strongly Disagree	Strongly Disagree	Strongly Disagree	Strongly Agree	Strongly Agree	Strongly Agree	Strongly Disagree	Strongly Disagree	Strongly Disagree	Strongly Agree	Strongly Disagree	Strongly Agree	Strongly Agree	Strongly Disagree	Strongly Disagree	Strongly Disagree	Strongly Disagree	Agree	Agree	Strongly Agree	Strongly Agree	Strongly Agree	Strongly Agree	Strongly Agree	Strongly Agree	Strongly Agree	Strongly Agree	Strongly Agree	Strongly Agree	Neutral	Strongly Agree	Strongly Agree	Strongly Agree
208	Female	21-25	PG	1st Year	North India	INSIDE INDIA	Yes	Social media		No	Yes	Practical application of telerehabilitation techniques		Strongly Disagree	Strongly Disagree	Strongly Agree	Strongly Agree	Strongly Agree	Strongly Disagree	Strongly Agree	Strongly Agree	Strongly Disagree	Strongly Agree	Strongly Disagree	Strongly Disagree	Strongly Disagree	Strongly Agree	Strongly Agree	Strongly Disagree	Strongly Agree	Strongly Agree	Strongly Agree	Strongly Disagree	Strongly Disagree	Strongly Disagree	Strongly Disagree	Strongly Disagree	Strongly Agree	Strongly Agree	Strongly Agree	Strongly Agree	Strongly Agree	Strongly Agree	Strongly Agree	Strongly Agree	Neutral	Strongly Agree	Neutral
209	Female	21-25	PG	1st Year	East India	INSIDE INDIA	No		Lack of exposure/information
210	Male	21-25	PG	1st Year	North India	INSIDE INDIA	Yes	Social media		No	Yes	Understanding telecommunication technologies		Strongly Disagree	Strongly Disagree	Agree	Agree	Disagree	Disagree	Agree	Strongly Disagree	Disagree	Disagree	Disagree	Strongly Disagree	Disagree	Agree	Agree	Agree	Disagree	Strongly Disagree	Agree	Strongly Disagree	Agree	Agree	Agree	Strongly Disagree	Agree	Neutral	Agree	Strongly Agree	Strongly Agree	Agree	Neutral	Agree	Agree	Agree	Agree
211	Female	21-25	PG	1st Year	South India	INSIDE INDIA	Yes	Workshops or seminars		No	Yes	Practical application of telerehabilitation techniques		Strongly Disagree	Agree	Agree	Agree	Disagree	Strongly Disagree	Strongly Disagree	Agree	Strongly Disagree	Strongly Disagree	Agree	Strongly Disagree	Agree	Agree	Agree	Agree	Strongly Disagree	Agree	Agree	Strongly Disagree	Agree	Agree	Agree	Agree	Agree	Agree	Agree	Strongly Agree	Agree	Agree	Agree	Neutral	Neutral	Neutral	Agree
212	Male	21-25	PG	1st Year	East India	INSIDE INDIA	Yes	Academic courses		Yes	Yes	Practical application of telerehabilitation techniques		Strongly Disagree	Strongly Agree	Strongly Agree	Strongly Agree	Strongly Agree	Strongly Disagree	Strongly Disagree	Strongly Disagree	Strongly Disagree	Disagree	Strongly Disagree	Strongly Disagree	Strongly Disagree	Agree	Agree	Strongly Disagree	Strongly Disagree	Strongly Disagree	Strongly Disagree	Strongly Disagree	Strongly Disagree	Strongly Disagree	Strongly Disagree	Strongly Disagree	Neutral	Strongly Agree	Strongly Agree	Strongly Agree	Strongly Agree	Neutral	Strongly Agree	Neutral	Neutral	Strongly Agree	Neutral
213	Female	18-20	UG	1st Year	South India	INSIDE INDIA	Yes	Research articles		No	Yes	Patient assessment and monitoring through telehealth		Agree	Strongly Disagree	Disagree	Strongly Disagree	Strongly Disagree	Disagree	Strongly Disagree	Disagree	Agree	Agree	Agree	Strongly Disagree	Agree	Disagree	Agree	Strongly Disagree	Disagree	Strongly Disagree	Agree	Disagree	Strongly Disagree	Strongly Disagree	Agree	Strongly Disagree	Agree	Agree	Agree	Agree	Strongly Agree	Neutral	Agree	Agree	Neutral	Neutral	Neutral
214	Male	>25	PG	1st Year	North India	INSIDE INDIA	Yes	Research articles		No	Yes	Understanding telecommunication technologies		Strongly Disagree	Strongly Agree	Strongly Agree	Strongly Agree	Strongly Agree	Strongly Agree	Strongly Agree	Agree	Strongly Disagree	Strongly Disagree	Strongly Agree	Strongly Agree	Strongly Agree	Agree	Strongly Agree	Strongly Agree	Strongly Agree	Strongly Agree	Strongly Agree	Agree	Agree	Strongly Agree	Strongly Agree	Strongly Agree	Strongly Agree	Strongly Agree	Strongly Agree	Strongly Agree	Strongly Agree	Strongly Agree	Strongly Agree	Strongly Agree	Strongly Agree	Strongly Agree	Strongly Agree
215	Male	21-25	UG	1st Year	West India	INSIDE INDIA	No		Lack of exposure/information
216	Male	21-25	UG	1st Year	North India	INSIDE INDIA	Yes	Workshops or seminars		No	Yes	Understanding telecommunication technologies		Strongly Disagree	Strongly Agree	Strongly Agree	Strongly Agree	Strongly Agree	Strongly Disagree	Strongly Agree	Strongly Disagree	Strongly Agree	Strongly Disagree	Strongly Agree	Strongly Disagree	Strongly Agree	Strongly Agree	Strongly Agree	Strongly Agree	Disagree	Strongly Agree	Strongly Agree	Strongly Disagree	Agree	Strongly Agree	Strongly Disagree	Strongly Disagree	Neutral	Disagree	Neutral	Strongly Agree	Strongly Agree	Strongly Agree	Strongly Agree	Neutral	Strongly Agree	Strongly Agree	Strongly Agree
217	Female	21-25	PG	1st Year	North India	INSIDE INDIA	Yes	Social media		Yes	Yes	Practical application of telerehabilitation techniques		Strongly Agree	Strongly Agree	Strongly Agree	Strongly Agree	Strongly Disagree	Strongly Agree	Strongly Agree	Agree	Strongly Agree	Strongly Agree	Strongly Agree	Strongly Agree	Strongly Agree	Strongly Agree	Strongly Agree	Strongly Agree	Strongly Agree	Strongly Agree	Strongly Agree	Agree	Agree	Strongly Agree	Strongly Agree	Strongly Agree	Strongly Agree	Strongly Agree	Strongly Agree	Strongly Agree	Strongly Agree	Strongly Agree	Strongly Agree	Strongly Agree	Strongly Agree	Strongly Agree	Strongly Agree
218	Male	21-25	UG	3rd Year	East India	INSIDE INDIA	Yes	Social media		No	Yes	Practical application of telerehabilitation techniques		Strongly Agree	Strongly Disagree	Strongly Disagree	Strongly Agree	Disagree	Strongly Disagree	Strongly Agree	Agree	Disagree	Disagree	Disagree	Strongly Agree	Strongly Agree	Strongly Agree	Strongly Agree	Strongly Agree	Strongly Agree	Strongly Agree	Strongly Agree	Agree	Agree	Strongly Agree	Strongly Agree	Strongly Agree	Strongly Agree	Neutral	Strongly Agree	Strongly Agree	Strongly Agree	Strongly Agree	Strongly Agree	Neutral	Strongly Agree	Strongly Agree	Strongly Agree
219	Female	21-25	UG	3rd Year	South India	INSIDE INDIA	No		Lack of exposure/information
220	Male	21-25	UG	4th Year	East India	INSIDE INDIA	No		Lack of exposure/information
221	Female	21-25	UG	4th Year	West India	INSIDE INDIA	No		Lack of exposure/information
222	Male	21-25	UG	Intern	North East India	INSIDE INDIA	Yes	Social media		No	Yes	Understanding telecommunication technologies		Strongly Disagree	Strongly Disagree	Strongly Disagree	Strongly Disagree	Strongly Disagree	Strongly Disagree	Strongly Disagree	Strongly Disagree	Strongly Disagree	Strongly Disagree	Strongly Disagree	Strongly Disagree	Strongly Disagree	Agree	Agree	Strongly Disagree	Strongly Disagree	Strongly Disagree	Strongly Disagree	Strongly Disagree	Strongly Disagree	Strongly Disagree	Strongly Disagree	Strongly Disagree	Neutral	Neutral	Neutral	Strongly Agree	Strongly Agree	Neutral	Neutral	Neutral	Neutral	Neutral	Neutral
223	Female	21-25	UG	4th Year	Central India	INSIDE INDIA	Yes	Research articles		No	Yes	Patient assessment and monitoring through telehealth		Strongly Disagree	Strongly Disagree	Strongly Disagree	Agree	Agree	Strongly Disagree	Agree	Agree	Agree	Agree	Strongly Disagree	Strongly Disagree	Agree	Agree	Agree	Strongly Disagree	Strongly Disagree	Agree	Agree	Agree	Agree	Agree	Agree	Agree	Agree	Agree	Agree	Agree	Agree	Agree	Agree	Agree	Agree	Agree	Agree
224	Male	18-20	UG	3rd Year	South India	INSIDE INDIA	Yes	Social media		No	Yes	Patient assessment and monitoring through telehealth		Strongly Disagree	Strongly Agree	Strongly Disagree	Strongly Agree	Strongly Agree	Strongly Disagree	Strongly Disagree	Agree	Strongly Agree	Strongly Agree	Strongly Disagree	Strongly Agree	Strongly Disagree	Strongly Agree	Strongly Agree	Strongly Agree	Strongly Agree	Strongly Agree	Strongly Agree	Agree	Agree	Strongly Agree	Strongly Agree	Strongly Disagree	Strongly Agree	Strongly Agree	Strongly Agree	Strongly Agree	Strongly Agree	Strongly Agree	Strongly Agree	Strongly Agree	Strongly Agree	Strongly Agree	Strongly Agree
225	Female	21-25	PG	1st Year	East India	INSIDE INDIA	Yes	Research articles		No	Yes	Patient assessment and monitoring through telehealth		Agree	Agree	Agree	Strongly Disagree	Strongly Disagree	Strongly Disagree	Strongly Disagree	Strongly Disagree	Strongly Disagree	Strongly Disagree	Strongly Disagree	Strongly Disagree	Strongly Disagree	Agree	Agree	Strongly Disagree	Strongly Disagree	Strongly Disagree	Strongly Disagree	Strongly Disagree	Strongly Disagree	Strongly Disagree	Strongly Disagree	Strongly Disagree	Neutral	Neutral	Neutral	Strongly Agree	Strongly Agree	Neutral	Neutral	Neutral	Neutral	Neutral	Neutral
226	Female	21-25	UG	4th Year	South India	INSIDE INDIA	No		Lack of exposure/information
227	Female	21-25	PG	1st Year	North East India	INSIDE INDIA	Yes	Research articles		Yes	Yes	Patient assessment and monitoring through telehealth		Strongly Disagree	Strongly Agree	Strongly Agree	Strongly Agree	Strongly Agree	Strongly Disagree	Strongly Agree	Agree	Strongly Disagree	Strongly Agree	Strongly Agree	Strongly Agree	Strongly Agree	Strongly Agree	Strongly Agree	Strongly Agree	Strongly Agree	Strongly Agree	Strongly Agree	Agree	Agree	Strongly Agree	Strongly Agree	Strongly Agree	Strongly Agree	Strongly Agree	Strongly Agree	Strongly Agree	Strongly Agree	Strongly Agree	Strongly Agree	Strongly Agree	Strongly Agree	Strongly Agree	Strongly Agree
228	Female	>25	PG	2nd Year	East India	INSIDE INDIA	No		Lack of exposure/information
229	Male	21-25	UG	4th Year	Central India	INSIDE INDIA	No		Lack of exposure/information
230	Male	>25	UG	4th Year	Southeast Asia	OUTSIDE INDIA	Yes	Academic courses		Yes	Yes	Practical application of telerehabilitation techniques		Strongly Disagree	Strongly Disagree	Strongly Disagree	Strongly Disagree	Strongly Disagree	Strongly Disagree	Strongly Disagree	Strongly Disagree	Strongly Disagree	Strongly Disagree	Strongly Disagree	Strongly Disagree	Strongly Disagree	Agree	Agree	Strongly Disagree	Strongly Disagree	Strongly Disagree	Strongly Disagree	Strongly Disagree	Strongly Disagree	Strongly Disagree	Strongly Disagree	Strongly Disagree	Neutral	Neutral	Neutral	Strongly Agree	Strongly Agree	Neutral	Neutral	Neutral	Neutral	Neutral	Neutral
231	Male	21-25	UG	3rd Year	North India	INSIDE INDIA	Yes	Academic courses		Yes	Yes	Patient assessment and monitoring through telehealth		Strongly Disagree	Agree	Strongly Disagree	Agree	Agree	Strongly Disagree	Agree	Agree	Agree	Strongly Disagree	Agree	Agree	Strongly Disagree	Agree	Agree	Strongly Disagree	Disagree	Strongly Disagree	Strongly Disagree	Strongly Disagree	Strongly Disagree	Agree	Agree	Strongly Disagree	Neutral	Neutral	Agree	Strongly Agree	Strongly Agree	Agree	Neutral	Neutral	Agree	Agree	Neutral
232	Female	21-25	UG	3rd Year	South Asia	OUTSIDE INDIA	Yes	Social media		No	No		Prefer traditional in-person instruction	Strongly Disagree	Strongly Disagree	Disagree	Strongly Disagree	Strongly Disagree	Strongly Disagree	Strongly Agree	Agree	Disagree	Strongly Disagree	Strongly Agree	Strongly Agree	Strongly Agree	Disagree	Strongly Agree	Strongly Disagree	Strongly Disagree	Strongly Disagree	Strongly Disagree	Strongly Disagree	Strongly Disagree	Strongly Disagree	Strongly Disagree	Strongly Disagree	Strongly Agree	Neutral	Neutral	Strongly Agree	Strongly Agree	Neutral	Neutral	Neutral	Neutral	Neutral	Neutral
233	Male	21-25	UG	Intern	North India	INSIDE INDIA	No		Lack of exposure/information
234	Male	21-25	PG	1st Year	East India	INSIDE INDIA	Yes	Workshops or seminars		Yes	Yes	Patient assessment and monitoring through telehealth		Strongly Agree	Strongly Agree	Strongly Agree	Strongly Agree	Strongly Agree	Strongly Agree	Strongly Agree	Agree	Strongly Agree	Strongly Agree	Strongly Agree	Strongly Agree	Strongly Agree	Strongly Agree	Strongly Agree	Strongly Agree	Strongly Agree	Strongly Agree	Strongly Agree	Agree	Agree	Strongly Agree	Strongly Agree	Strongly Agree	Strongly Agree	Strongly Agree	Strongly Agree	Strongly Agree	Strongly Agree	Strongly Agree	Strongly Agree	Strongly Agree	Strongly Agree	Strongly Agree	Strongly Agree
235	Male	21-25	PG	2nd Year	South India	INSIDE INDIA	Yes	Research articles		No	Yes	Practical application of telerehabilitation techniques		Strongly Agree	Strongly Disagree	Strongly Disagree	Strongly Agree	Strongly Agree	Strongly Disagree	Strongly Agree	Agree	Strongly Disagree	Strongly Agree	Strongly Disagree	Strongly Agree	Strongly Disagree	Strongly Agree	Strongly Agree	Strongly Agree	Strongly Disagree	Strongly Agree	Strongly Agree	Agree	Agree	Strongly Agree	Strongly Agree	Strongly Disagree	Strongly Agree	Neutral	Strongly Agree	Strongly Agree	Strongly Agree	Strongly Agree	Strongly Agree	Strongly Agree	Strongly Agree	Strongly Agree	Strongly Agree
236	Female	18-20	UG	3rd Year	South India	INSIDE INDIA	No		Lack of exposure/information
237	Female	>25	PG	1st Year	East India	INSIDE INDIA	No		Lack of exposure/information
238	Male	18-20	UG	3rd Year	South India	INSIDE INDIA	No		Lack of exposure/information
239	Male	21-25	UG	3rd Year	North India	INSIDE INDIA	Yes	Academic courses		No	Yes	Understanding telecommunication technologies		Strongly Disagree	Strongly Agree	Strongly Agree	Strongly Agree	Strongly Disagree	Strongly Agree	Strongly Agree	Agree	Strongly Agree	Strongly Disagree	Strongly Agree	Strongly Agree	Strongly Disagree	Agree	Agree	Strongly Agree	Strongly Agree	Strongly Agree	Strongly Agree	Strongly Disagree	Agree	Strongly Disagree	Strongly Agree	Strongly Disagree	Strongly Agree	Strongly Agree	Strongly Agree	Strongly Agree	Strongly Agree	Neutral	Neutral	Neutral	Strongly Agree	Strongly Disagree	Strongly Agree
240	Female	21-25	UG	3rd Year	West India	INSIDE INDIA	Yes	Workshops or seminars		Yes	Yes	Practical application of telerehabilitation techniques		Agree	Agree	Agree	Agree	Agree	Agree	Disagree	Agree	Strongly Disagree	Agree	Strongly Disagree	Strongly Disagree	Agree	Agree	Agree	Agree	Strongly Disagree	Agree	Strongly Disagree	Agree	Agree	Agree	Agree	Agree	Agree	Agree	Agree	Agree	Agree	Agree	Agree	Agree	Agree	Agree	Neutral
241	Female	18-20	UG	3rd Year	North India	INSIDE INDIA	No		Limited interest in healthcare topics
242	Female	21-25	UG	3rd Year	South India	INSIDE INDIA	Yes	Social media		No	Yes	Patient assessment and monitoring through telehealth		Strongly Agree	Strongly Disagree	Strongly Agree	Strongly Agree	Strongly Agree	Strongly Disagree	Strongly Agree	Agree	Strongly Agree	Strongly Disagree	Strongly Disagree	Disagree	Strongly Disagree	Strongly Agree	Strongly Agree	Strongly Agree	Strongly Disagree	Strongly Disagree	Strongly Disagree	Strongly Disagree	Agree	Strongly Agree	Strongly Agree	Strongly Agree	Strongly Agree	Strongly Agree	Strongly Agree	Strongly Agree	Strongly Agree	Strongly Agree	Strongly Agree	Strongly Agree	Neutral	Strongly Agree	Strongly Agree
243	Female	18-20	PG	3rd Year	East India	INSIDE INDIA	Yes	Academic courses		No	Yes	Patient assessment and monitoring through telehealth		Strongly Agree	Strongly Agree	Strongly Disagree	Strongly Disagree	Strongly Disagree	Strongly Disagree	Disagree	Strongly Disagree	Strongly Disagree	Strongly Disagree	Strongly Disagree	Strongly Disagree	Strongly Disagree	Agree	Agree	Strongly Disagree	Strongly Disagree	Strongly Disagree	Strongly Disagree	Strongly Disagree	Strongly Disagree	Strongly Disagree	Strongly Disagree	Strongly Disagree	Neutral	Neutral	Neutral	Strongly Agree	Strongly Agree	Neutral	Neutral	Neutral	Neutral	Neutral	Neutral
244	Female	18-20	UG	3rd Year	North West India	INSIDE INDIA	Yes	Academic courses		Yes	Yes	Patient assessment and monitoring through telehealth		Strongly Agree	Strongly Agree	Strongly Agree	Strongly Agree	Strongly Agree	Strongly Disagree	Strongly Agree	Strongly Disagree	Strongly Agree	Strongly Disagree	Strongly Disagree	Strongly Agree	Strongly Agree	Agree	Strongly Agree	Strongly Disagree	Strongly Agree	Strongly Disagree	Strongly Disagree	Strongly Disagree	Agree	Strongly Disagree	Strongly Disagree	Strongly Agree	Strongly Agree	Strongly Agree	Neutral	Strongly Agree	Strongly Agree	Strongly Agree	Neutral	Strongly Agree	Strongly Agree	Strongly Agree	Strongly Agree
245	Female	18-20	UG	3rd Year	South India	INSIDE INDIA	Yes	Social media		No	Yes	Patient assessment and monitoring through telehealth		Strongly Disagree	Strongly Disagree	Strongly Disagree	Strongly Disagree	Strongly Disagree	Strongly Disagree	Strongly Disagree	Strongly Disagree	Strongly Disagree	Strongly Disagree	Strongly Disagree	Strongly Disagree	Strongly Disagree	Agree	Agree	Strongly Disagree	Strongly Disagree	Strongly Disagree	Strongly Disagree	Strongly Disagree	Strongly Disagree	Strongly Disagree	Strongly Disagree	Strongly Disagree	Neutral	Neutral	Neutral	Strongly Agree	Strongly Agree	Neutral	Neutral	Neutral	Neutral	Neutral	Neutral
246	Female	21-25	UG	3rd Year	East India	INSIDE INDIA	Yes	Social media		No	Yes	Patient assessment and monitoring through telehealth		Strongly Disagree	Strongly Disagree	Strongly Disagree	Strongly Disagree	Strongly Disagree	Strongly Disagree	Strongly Disagree	Strongly Disagree	Strongly Disagree	Strongly Disagree	Strongly Disagree	Strongly Disagree	Strongly Disagree	Agree	Agree	Strongly Disagree	Strongly Disagree	Strongly Disagree	Strongly Disagree	Strongly Disagree	Strongly Disagree	Strongly Disagree	Strongly Disagree	Strongly Disagree	Neutral	Neutral	Neutral	Strongly Agree	Strongly Agree	Neutral	Neutral	Neutral	Neutral	Neutral	Neutral
247	Female	>25	PG	2nd Year	North India	INSIDE INDIA	Yes	Research articles		No	Yes	Patient assessment and monitoring through telehealth		Strongly Agree	Strongly Agree	Disagree	Strongly Disagree	Strongly Agree	Strongly Disagree	Strongly Agree	Agree	Strongly Disagree	Disagree	Disagree	Strongly Disagree	Strongly Disagree	Strongly Agree	Agree	Strongly Disagree	Disagree	Disagree	Strongly Disagree	Strongly Disagree	Strongly Disagree	Strongly Disagree	Strongly Agree	Strongly Disagree	Strongly Agree	Neutral	Neutral	Strongly Agree	Strongly Agree	Disagree	Neutral	Neutral	Neutral	Strongly Agree	Strongly Agree
248	Male	18-20	UG	3rd Year	West India	INSIDE INDIA	Yes	Research articles		Yes	Yes	Understanding telecommunication technologies		Strongly Agree	Strongly Agree	Strongly Agree	Strongly Agree	Strongly Disagree	Disagree	Strongly Agree	Strongly Disagree	Strongly Agree	Strongly Disagree	Strongly Agree	Strongly Agree	Disagree	Disagree	Disagree	Disagree	Disagree	Disagree	Disagree	Disagree	Disagree	Strongly Disagree	Disagree	Strongly Disagree	Strongly Agree	Neutral	Neutral	Strongly Agree	Disagree	Neutral	Neutral	Strongly Disagree	Disagree	Strongly Disagree	Strongly Disagree
249	Male	18-20	UG	3rd Year	North East India	INSIDE INDIA	Yes	Social media		Yes	Yes	Practical application of telerehabilitation techniques		Strongly Agree	Strongly Agree	Strongly Disagree	Strongly Agree	Strongly Disagree	Strongly Disagree	Strongly Agree	Agree	Strongly Agree	Strongly Agree	Strongly Agree	Strongly Disagree	Strongly Agree	Strongly Agree	Strongly Agree	Strongly Agree	Strongly Disagree	Strongly Agree	Strongly Agree	Agree	Agree	Strongly Agree	Strongly Agree	Strongly Disagree	Neutral	Strongly Agree	Strongly Agree	Strongly Agree	Strongly Agree	Strongly Agree	Neutral	Strongly Agree	Neutral	Strongly Agree	Strongly Agree
250	Male	21-25	UG	4th Year	North India	INSIDE INDIA	No		Insufficient educational background
251	Male	18-20	UG	3rd Year	West India	INSIDE INDIA	Yes	Social media		No	Yes	Patient assessment and monitoring through telehealth		Agree	Agree	Disagree	Strongly Disagree	Agree	Agree	Agree	Strongly Disagree	Strongly Disagree	Agree	Strongly Disagree	Strongly Disagree	Agree	Agree	Agree	Disagree	Disagree	Agree	Agree	Agree	Agree	Agree	Agree	Agree	Disagree	Agree	Agree	Agree	Agree	Agree	Agree	Agree	Agree	Agree	Agree
252	Female	18-20	UG	Intern	North India	INSIDE INDIA	Yes	Research articles		No	Yes	Practical application of telerehabilitation techniques		Strongly Disagree	Strongly Agree	Strongly Agree	Strongly Agree	Strongly Agree	Strongly Agree	Strongly Agree	Agree	Strongly Agree	Strongly Agree	Strongly Agree	Strongly Disagree	Strongly Agree	Strongly Agree	Strongly Agree	Strongly Agree	Strongly Agree	Strongly Agree	Strongly Agree	Agree	Agree	Strongly Disagree	Strongly Agree	Strongly Agree	Neutral	Neutral	Neutral	Strongly Agree	Strongly Agree	Neutral	Neutral	Neutral	Neutral	Neutral	Neutral
253	Male	>25	PG	2nd Year	North India	INSIDE INDIA	Yes	Workshops or seminars		Yes	No		Lack of time or resources	Strongly Disagree	Strongly Disagree	Agree	Agree	Agree	Agree	Agree	Strongly Disagree	Agree	Agree	Strongly Disagree	Strongly Disagree	Strongly Disagree	Agree	Agree	Strongly Disagree	Agree	Strongly Disagree	Strongly Disagree	Strongly Disagree	Strongly Disagree	Agree	Agree	Strongly Disagree	Neutral	Neutral	Neutral	Strongly Agree	Strongly Agree	Agree	Neutral	Neutral	Neutral	Neutral	Neutral
254	Female	18-20	UG	3rd Year	North India	INSIDE INDIA	Yes	Academic courses		No	Yes	Practical application of telerehabilitation techniques		Strongly Disagree	Strongly Agree	Strongly Agree	Strongly Agree	Strongly Agree	Strongly Agree	Strongly Agree	Agree	Strongly Agree	Strongly Agree	Strongly Disagree	Strongly Disagree	Strongly Agree	Disagree	Agree	Strongly Agree	Disagree	Strongly Agree	Disagree	Agree	Strongly Disagree	Disagree	Strongly Agree	Strongly Disagree	Strongly Agree	Neutral	Disagree	Strongly Agree	Strongly Agree	Disagree	Strongly Agree	Neutral	Disagree	Strongly Agree	Neutral
255	Male	21-25	UG	Intern	North India	INSIDE INDIA	Yes	Workshops or seminars		No	Yes	Practical application of telerehabilitation techniques		Agree	Agree	Agree	Strongly Disagree	Disagree	Disagree	Strongly Disagree	Agree	Disagree	Agree	Disagree	Agree	Strongly Disagree	Agree	Agree	Agree	Strongly Disagree	Agree	Strongly Disagree	Agree	Strongly Disagree	Strongly Disagree	Disagree	Strongly Disagree	Agree	Neutral	Agree	Strongly Agree	Strongly Agree	Agree	Neutral	Agree	Neutral	Agree	Agree
256	Male	21-25	UG	3rd Year	North India	INSIDE INDIA	No		Lack of exposure/information
257	Male	21-25	UG	3rd Year	Central India	INSIDE INDIA	Yes	Academic courses		Yes	Yes	Practical application of telerehabilitation techniques		Agree	Strongly Disagree	Strongly Disagree	Agree	Agree	Disagree	Agree	Agree	Agree	Agree	Agree	Agree	Agree	Agree	Agree	Agree	Agree	Agree	Agree	Agree	Agree	Agree	Agree	Agree	Agree	Agree	Agree	Agree	Agree	Agree	Agree	Agree	Agree	Agree	Agree
258	Female	21-25	UG	4th Year	East India	INSIDE INDIA	No		Limited interest in healthcare topics
259	Male	21-25	UG	Intern	North East India	INSIDE INDIA	No		Lack of exposure/information
260	Male	21-25	UG	4th Year	West India	INSIDE INDIA	No		Insufficient educational background
261	Male	21-25	UG	3rd Year	North India	INSIDE INDIA	No		Lack of exposure/information
262	Male	21-25	UG	Intern	East India	INSIDE INDIA	Yes	Research articles		No	No		Not relevant to my career goals	Strongly Agree	Strongly Agree	Strongly Agree	Strongly Agree	Strongly Agree	Strongly Agree	Strongly Agree	Agree	Strongly Agree	Strongly Agree	Strongly Agree	Strongly Agree	Strongly Agree	Strongly Agree	Strongly Agree	Strongly Agree	Strongly Agree	Strongly Agree	Strongly Agree	Agree	Agree	Strongly Disagree	Strongly Agree	Strongly Agree	Strongly Agree	Strongly Agree	Strongly Agree	Strongly Agree	Strongly Agree	Strongly Agree	Strongly Agree	Strongly Agree	Strongly Agree	Strongly Agree	Strongly Agree
263	Male	21-25	UG	4th Year	South India	INSIDE INDIA	No		Insufficient educational background
264	Male	21-25	UG	3rd Year	South India	INSIDE INDIA	No		Insufficient educational background
265	Male	21-25	UG	Intern	South India	INSIDE INDIA	Yes	Academic courses		Yes	No		Prefer traditional in-person instruction	Agree	Agree	Agree	Agree	Agree	Agree	Agree	Agree	Agree	Agree	Agree	Agree	Agree	Agree	Agree	Agree	Agree	Agree	Agree	Agree	Agree	Agree	Agree	Agree	Agree	Agree	Agree	Agree	Agree	Agree	Agree	Agree	Agree	Agree	Agree
266	Male	21-25	UG	3rd Year	Southeast Asia	OUTSIDE INDIA	Yes	Social media		No	Yes	Patient assessment and monitoring through telehealth		Strongly Disagree	Strongly Disagree	Strongly Agree	Strongly Disagree	Strongly Disagree	Disagree	Strongly Disagree	Agree	Strongly Disagree	Strongly Disagree	Strongly Disagree	Disagree	Disagree	Agree	Agree	Neutral	Neutral	Neutral	Neutral	Neutral	Neutral	Neutral	Neutral	Neutral	Strongly Agree	Neutral	Neutral	Strongly Agree	Strongly Agree	Neutral	Neutral	Neutral	Neutral	Strongly Agree	Strongly Agree
267	Male	21-25	UG	Intern	North India	INSIDE INDIA	Yes	Research articles		Yes	Yes	Understanding telecommunication technologies		Strongly Disagree	Agree	Agree	Strongly Disagree	Strongly Disagree	Agree	Strongly Disagree	Agree	Agree	Strongly Disagree	Agree	Agree	Neutral	Agree	Agree	Agree	Disagree	Neutral	Agree	Neutral	Agree	Agree	Agree	Disagree	Agree	Neutral	Agree	Agree	Agree	Agree	Agree	Agree	Agree	Agree	Agree
268	Male	21-25	UG	3rd Year	Southeast Asia	OUTSIDE INDIA	No		Lack of exposure/information
269	Female	21-25	UG	3rd Year	Middle East	OUTSIDE INDIA	Yes	Social media		No	Yes	Practical application of telerehabilitation techniques		Strongly Disagree	Strongly Disagree	Strongly Disagree	Strongly Disagree	Strongly Disagree	Strongly Disagree	Strongly Disagree	Strongly Disagree	Strongly Disagree	Agree	Strongly Disagree	Neutral	Neutral	Strongly Disagree	Strongly Agree	Neutral	Neutral	Agree	Agree	Agree	Agree	Agree	Agree	Agree	Neutral	Agree	Agree	Agree	Agree	Neutral	Neutral	Neutral	Agree	Agree	Agree
270	Female	21-25	UG	3rd Year	Southeast Asia	OUTSIDE INDIA	Yes	Social media		No	Yes	Practical application of telerehabilitation techniques		Disagree	Disagree	Disagree	Strongly Agree	Disagree	Disagree	Strongly Agree	Agree	Strongly Disagree	Strongly Agree	Disagree	Strongly Agree	Strongly Agree	Strongly Agree	Strongly Agree	Strongly Agree	Disagree	Neutral	Strongly Agree	Strongly Disagree	Strongly Disagree	Strongly Disagree	Strongly Agree	Strongly Agree	Strongly Agree	Strongly Agree	Strongly Agree	Strongly Agree	Strongly Agree	Strongly Agree	Strongly Agree	Strongly Agree	Strongly Agree	Strongly Agree	Strongly Agree
271	Male	>25	UG	3rd Year	Southeast Asia	OUTSIDE INDIA	Yes	Social media		No	Yes	Practical application of telerehabilitation techniques		Strongly Disagree	Agree	Strongly Disagree	Strongly Disagree	Disagree	Disagree	Agree	Agree	Strongly Disagree	Agree	Disagree	Agree	Agree	Agree	Strongly Agree	Agree	Disagree	Agree	Agree	Agree	Agree	Agree	Agree	Neutral	Agree	Neutral	Agree	Agree	Agree	Agree	Neutral	Agree	Neutral	Agree	Agree
272	Female	21-25	UG	3rd Year	South Asia	OUTSIDE INDIA	Yes	Research articles		No	Yes	Patient assessment and monitoring through telehealth		Disagree	Agree	Disagree	Strongly Disagree	Strongly Disagree	Strongly Disagree	Strongly Disagree	Strongly Disagree	Disagree	Agree	Disagree	Neutral	Agree	Strongly Disagree	Agree	Agree	Neutral	Neutral	Neutral	Agree	Agree	Agree	Agree	Agree	Neutral	Neutral	Agree	Agree	Agree	Agree	Neutral	Neutral	Agree	Agree	Agree
273	Male	21-25	PG	2nd Year	North India	INSIDE INDIA	No		Lack of exposure/information
274	Male	21-25	UG	3rd Year	Middle East	OUTSIDE INDIA	No		Insufficient educational background
275	Male	>25	PG	2nd Year	North India	INSIDE INDIA	Yes	Workshops or seminars		No	Yes	Patient assessment and monitoring through telehealth		Agree	Agree	Agree	Agree	Strongly Disagree	Agree	Agree	Agree	Agree	Agree	Agree	Agree	Agree	Agree	Agree	Agree	Agree	Agree	Agree	Agree	Agree	Agree	Agree	Agree	Agree	Agree	Agree	Agree	Agree	Agree	Agree	Agree	Agree	Agree	Agree
276	Female	21-25	UG	3rd Year	West India	INSIDE INDIA	Yes	Academic courses		Yes	Yes	Practical application of telerehabilitation techniques		Strongly Agree	Strongly Agree	Strongly Disagree	Strongly Agree	Strongly Agree	Strongly Disagree	Strongly Agree	Agree	Strongly Disagree	Strongly Disagree	Strongly Disagree	Strongly Agree	Neutral	Strongly Agree	Agree	Neutral	Neutral	Strongly Agree	Strongly Agree	Strongly Disagree	Strongly Disagree	Neutral	Neutral	Neutral	Strongly Agree	Neutral	Strongly Agree	Strongly Agree	Strongly Agree	Strongly Agree	Neutral	Strongly Agree	Neutral	Neutral	Strongly Agree
277	Male	21-25	PG	2nd Year	South India	INSIDE INDIA	Yes	Social media		Yes	Yes	Patient assessment and monitoring through telehealth		Strongly Agree	Strongly Agree	Strongly Agree	Strongly Agree	Strongly Agree	Strongly Agree	Strongly Disagree	Agree	Strongly Disagree	Strongly Disagree	Strongly Agree	Strongly Agree	Neutral	Strongly Agree	Agree	Strongly Agree	Neutral	Neutral	Strongly Agree	Strongly Disagree	Strongly Disagree	Strongly Disagree	Strongly Agree	Strongly Agree	Strongly Agree	Strongly Agree	Strongly Agree	Strongly Agree	Strongly Agree	Strongly Agree	Strongly Agree	Strongly Agree	Strongly Agree	Neutral	Strongly Agree
278	Female	21-25	UG	Intern	North East India	INSIDE INDIA	Yes	Research articles		No	Yes	Practical application of telerehabilitation techniques		Strongly Agree	Strongly Disagree	Strongly Disagree	Strongly Disagree	Strongly Disagree	Strongly Disagree	Strongly Disagree	Strongly Disagree	Strongly Disagree	Strongly Disagree	Strongly Disagree	Strongly Agree	Neutral	Strongly Agree	Strongly Agree	Strongly Agree	Neutral	Neutral	Strongly Agree	Strongly Disagree	Strongly Disagree	Strongly Disagree	Strongly Agree	Neutral	Strongly Agree	Strongly Agree	Strongly Agree	Strongly Agree	Strongly Agree	Strongly Agree	Strongly Agree	Neutral	Neutral	Neutral	Neutral
279	Male	21-25	UG	Intern	Central India	INSIDE INDIA	Yes	Research articles		No	Yes	Practical application of telerehabilitation techniques		Strongly Agree	Strongly Agree	Strongly Agree	Strongly Agree	Strongly Agree	Strongly Agree	Strongly Agree	Agree	Strongly Agree	Strongly Agree	Strongly Agree	Strongly Agree	Strongly Agree	Strongly Agree	Strongly Agree	Strongly Agree	Strongly Agree	Strongly Agree	Strongly Agree	Strongly Disagree	Strongly Disagree	Strongly Disagree	Strongly Agree	Strongly Agree	Strongly Agree	Strongly Agree	Strongly Agree	Strongly Agree	Strongly Agree	Strongly Agree	Strongly Agree	Strongly Agree	Strongly Agree	Strongly Agree	Strongly Agree
280	Male	>25	UG	Intern	Southeast Asia	OUTSIDE INDIA	Yes	Social media		No	Yes	Practical application of telerehabilitation techniques		Strongly Agree	Strongly Agree	Strongly Agree	Strongly Agree	Strongly Agree	Disagree	Strongly Agree	Agree	Strongly Agree	Strongly Agree	Strongly Agree	Strongly Agree	Strongly Agree	Strongly Agree	Strongly Agree	Strongly Agree	Strongly Agree	Strongly Agree	Strongly Agree	Strongly Disagree	Strongly Disagree	Strongly Disagree	Neutral	Neutral	Strongly Agree	Strongly Agree	Strongly Agree	Strongly Agree	Strongly Agree	Strongly Agree	Strongly Agree	Strongly Agree	Neutral	Strongly Agree	Strongly Agree
281	Male	>25	Ph.d.,		North India	INSIDE INDIA	Yes	Academic courses		No	Yes	Patient assessment and monitoring through telehealth		Agree	Agree	Agree	Agree	Agree	Strongly Disagree	Strongly Disagree	Agree	Agree	Strongly Disagree	Agree	Agree	Agree	Agree	Agree	Agree	Neutral	Neutral	Agree	Neutral	Agree	Agree	Agree	Neutral	Agree	Neutral	Agree	Strongly Disagree	Strongly Disagree	Agree	Neutral	Neutral	Neutral	Agree	Agree
282	Female	21-25	PG	2nd Year	North India	INSIDE INDIA	No		Lack of exposure/information
283	Female	21-25	PG	2nd Year	East India	INSIDE INDIA	No		Lack of exposure/information
284	Female	21-25	PG	2nd Year	South India	INSIDE INDIA	No		Lack of exposure/information
285	Female	>25	PG	2nd Year	South India	INSIDE INDIA	No		Lack of exposure/information
286	Male	21-25	PG	2nd Year	South India	INSIDE INDIA	Yes	Research articles		No	Yes	Patient assessment and monitoring through telehealth		Disagree	Disagree	Strongly Agree	Strongly Disagree	Disagree	Disagree	Strongly Disagree	Agree	Strongly Agree	Strongly Disagree	Strongly Agree	Neutral	Neutral	Strongly Agree	Agree	Neutral	Neutral	Neutral	Neutral	Neutral	Neutral	Neutral	Neutral	Neutral	Strongly Agree	Strongly Agree	Strongly Agree	Strongly Agree	Strongly Agree	Strongly Agree	Strongly Agree	Strongly Agree	Strongly Agree	Strongly Agree	Strongly Agree
287	Female	>25	PG	2nd Year	South India	INSIDE INDIA	No		Lack of exposure/information
288	Female	>25	PG	2nd Year	East India	INSIDE INDIA	No		Lack of exposure/information
289	Female	21-25	PG	2nd Year	West India	INSIDE INDIA	Yes	Research articles		No	Yes	Practical application of telerehabilitation techniques		Disagree	Agree	Disagree	Disagree	Disagree	Disagree	Agree	Agree	Disagree	Disagree	Disagree	Disagree	Agree	Agree	Disagree	Agree	Disagree	Agree	Agree	Agree	Agree	Agree	Disagree	Disagree	Agree	Disagree	Agree	Disagree	Agree	Agree	Agree	Agree	Disagree	Strongly Disagree	Agree
290	Female	21-25	PG	2nd Year	Central India	INSIDE INDIA	No		Lack of exposure/information
291	Male	>25	Ph.d.,		South India	INSIDE INDIA	Yes	Research articles		No	Yes	Patient assessment and monitoring through telehealth		Strongly Disagree	Strongly Disagree	Strongly Agree	Strongly Disagree	Disagree	Disagree	Strongly Agree	Strongly Disagree	Strongly Disagree	Strongly Disagree	Strongly Agree	Strongly Agree	Strongly Agree	Strongly Agree	Strongly Agree	Neutral	Disagree	Strongly Agree	Neutral	Agree	Agree	Neutral	Strongly Agree	Disagree	Strongly Agree	Neutral	Strongly Agree	Strongly Agree	Strongly Disagree	Strongly Agree	Strongly Agree	Neutral	Neutral	Strongly Agree	Strongly Agree
292	Female	21-25	PG	2nd Year	North East India	INSIDE INDIA	Yes	Social media		No	Yes	Patient assessment and monitoring through telehealth		Strongly Agree	Strongly Agree	Strongly Agree	Strongly Agree	Strongly Disagree	Disagree	Disagree	Strongly Disagree	Strongly Agree	Strongly Agree	Strongly Agree	Strongly Agree	Neutral	Strongly Agree	Agree	Strongly Agree	Strongly Agree	Neutral	Strongly Agree	Neutral	Agree	Disagree	Strongly Agree	Neutral	Strongly Agree	Strongly Agree	Strongly Agree	Strongly Agree	Strongly Agree	Neutral	Neutral	Neutral	Strongly Agree	Agree	Neutral
293	Female	21-25	PG	2nd Year	Central India	INSIDE INDIA	No		Lack of exposure/information
294	Male	21-25	PG	2nd Year	North India	INSIDE INDIA	Yes	Academic courses		Yes	Yes	Patient assessment and monitoring through telehealth		Strongly Agree	Strongly Disagree	Strongly Disagree	Strongly Agree	Strongly Agree	Strongly Agree	Disagree	Disagree	Strongly Agree	Strongly Agree	Strongly Agree	Strongly Agree	Neutral	Strongly Agree	Strongly Agree	Strongly Agree	Neutral	Neutral	Neutral	Agree	Agree	Strongly Disagree	Neutral	Strongly Agree	Strongly Agree	Neutral	Neutral	Strongly Agree	Strongly Disagree	Strongly Agree	Strongly Agree	Strongly Agree	Strongly Agree	Strongly Agree	Strongly Agree
295	Female	21-25	PG	2nd Year	North India	INSIDE INDIA	Yes	Social media		No	Yes	Patient assessment and monitoring through telehealth		Strongly Agree	Disagree	Disagree	Disagree	Disagree	Disagree	Disagree	Disagree	Disagree	Disagree	Disagree	Neutral	Neutral	Agree	Agree	Neutral	Neutral	Neutral	Neutral	Neutral	Neutral	Neutral	Neutral	Strongly Agree	Strongly Agree	Strongly Agree	Strongly Agree	Strongly Agree	Strongly Agree	Strongly Agree	Strongly Agree	Strongly Agree	Strongly Agree	Strongly Agree	Strongly Agree
296	Male	21-25	PG	2nd Year	North India	INSIDE INDIA	Yes	Research articles		No	Yes	Practical application of telerehabilitation techniques		Strongly Agree	Strongly Agree	Strongly Agree	Strongly Agree	Strongly Agree	Strongly Agree	Strongly Agree	Agree	Strongly Agree	Strongly Agree	Strongly Agree	Strongly Agree	Strongly Agree	Strongly Agree	Strongly Agree	Strongly Agree	Strongly Agree	Strongly Agree	Strongly Agree	Agree	Agree	Strongly Disagree	Strongly Agree	Strongly Agree	Strongly Agree	Strongly Agree	Strongly Agree	Strongly Agree	Strongly Agree	Strongly Agree	Strongly Agree	Neutral	Neutral	Strongly Agree	Neutral
297	Female	21-25	PG	1st Year	North East India	INSIDE INDIA	No		Lack of exposure/information
298	Female	21-25	PG	1st Year	South India	INSIDE INDIA	Yes	Social media		No	Yes	Patient assessment and monitoring through telehealth		Strongly Agree	Strongly Agree	Strongly Disagree	Strongly Disagree	Disagree	Disagree	Strongly Agree	Agree	Disagree	Strongly Disagree	Strongly Disagree	Strongly Agree	Strongly Agree	Strongly Agree	Agree	Strongly Agree	Neutral	Neutral	Strongly Agree	Agree	Neutral	Neutral	Neutral	Strongly Agree	Strongly Agree	Strongly Agree	Strongly Agree	Strongly Agree	Strongly Agree	Strongly Agree	Strongly Agree	Neutral	Strongly Agree	Strongly Agree	Strongly Agree
299	Female	21-25	PG	1st Year	North India	INSIDE INDIA	Yes	Social media		No	Yes	Patient assessment and monitoring through telehealth		Strongly Disagree	Strongly Disagree	Strongly Disagree	Strongly Agree	Strongly Disagree	Strongly Disagree	Strongly Agree	Strongly Disagree	Strongly Agree	Strongly Agree	Strongly Disagree	Neutral	Neutral	Agree	Agree	Neutral	Strongly Agree	Strongly Agree	Strongly Agree	Agree	Agree	Neutral	Strongly Agree	Strongly Agree	Strongly Agree	Disagree	Disagree	Disagree	Strongly Disagree	Neutral	Strongly Agree	Strongly Agree	Strongly Agree	Strongly Agree	Strongly Agree
300	Male	21-25	PG	1st Year	North East India	INSIDE INDIA	Yes	Research articles		No	Yes	Patient assessment and monitoring through telehealth		Disagree	Disagree	Strongly Disagree	Strongly Disagree	Disagree	Strongly Disagree	Strongly Agree	Strongly Disagree	Disagree	Strongly Disagree	Disagree	Neutral	Strongly Agree	Strongly Agree	Agree	Neutral	Disagree	Disagree	Strongly Agree	Neutral	Agree	Disagree	Strongly Agree	Neutral	Neutral	Neutral	Strongly Agree	Strongly Disagree	Strongly Agree	Strongly Agree	Neutral	Neutral	Neutral	Strongly Agree	Strongly Agree
301	Female	21-25	PG	1st Year	West India	INSIDE INDIA	Yes	Social media		No	Yes	Patient assessment and monitoring through telehealth		Strongly Disagree	Strongly Disagree	Disagree	Strongly Agree	Disagree	Disagree	Strongly Disagree	Agree	Disagree	Strongly Agree	Disagree	Strongly Agree	Neutral	Strongly Agree	Agree	Strongly Agree	Neutral	Strongly Agree	Agree	Agree	Agree	Neutral	Strongly Agree	Disagree	Strongly Agree	Disagree	Neutral	Strongly Agree	Strongly Agree	Strongly Agree	Neutral	Strongly Disagree	Strongly Agree	Strongly Agree	Strongly Agree
302	Female	21-25	PG	1st Year	South India	INSIDE INDIA	Yes	Research articles		No	Yes	Understanding telecommunication technologies		Disagree	Disagree	Strongly Disagree	Strongly Disagree	Disagree	Disagree	Strongly Agree	Agree	Strongly Disagree	Disagree	Disagree	Neutral	Strongly Agree	Strongly Agree	Agree	Neutral	Disagree	Neutral	Agree	Neutral	Agree	Strongly Disagree	Strongly Agree	Strongly Agree	Strongly Agree	Neutral	Neutral	Neutral	Strongly Agree	Neutral	Neutral	Neutral	Neutral	Neutral	Neutral
303	Male	21-25	PG	1st Year	East India	INSIDE INDIA	Yes	Academic courses		No	Yes	Understanding telecommunication technologies		Strongly Agree	Strongly Agree	Strongly Disagree	Disagree	Strongly Disagree	Strongly Agree	Strongly Agree	Disagree	Strongly Disagree	Strongly Agree	Strongly Agree	Disagree	Strongly Agree	Strongly Agree	Strongly Agree	Strongly Agree	Neutral	Strongly Agree	Strongly Agree	Agree	Disagree	Strongly Disagree	Strongly Agree	Strongly Agree	Strongly Agree	Strongly Agree	Neutral	Strongly Agree	Strongly Agree	Strongly Agree	Strongly Agree	Strongly Agree	Strongly Agree	Neutral	Strongly Agree
304	Female	21-25	PG	2nd Year	North India	INSIDE INDIA	No		Lack of exposure/information
305	Male	21-25	UG	3rd Year	South Asia	OUTSIDE INDIA	No		Lack of exposure/information
306	Female	>25	UG	Intern	South India	INSIDE INDIA	Yes	Workshops or seminars		No	Yes	Legal and ethical considerations		Strongly Disagree	Agree	Agree	Agree	Agree	Disagree	Agree	Strongly Disagree	Disagree	Agree	Agree	Neutral	Agree	Agree	Agree	Neutral	Agree	Disagree	Disagree	Agree	Disagree	Disagree	Neutral	Neutral	Agree	Neutral	Agree	Agree	Agree	Agree	Agree	Neutral	Agree	Agree	Agree
307	Male	>25	UG	Intern	South India	INSIDE INDIA	Yes	Social media		Yes	Yes	Understanding telecommunication technologies		Strongly Agree	Strongly Agree	Strongly Agree	Strongly Agree	Strongly Agree	Strongly Disagree	Strongly Agree	Strongly Disagree	Strongly Disagree	Strongly Disagree	Strongly Agree	Neutral	Strongly Agree	Strongly Agree	Strongly Agree	Strongly Agree	Strongly Agree	Neutral	Agree	Neutral	Agree	Strongly Disagree	Strongly Agree	Neutral	Strongly Agree	Strongly Agree	Neutral	Strongly Agree	Strongly Agree	Strongly Agree	Strongly Agree	Strongly Agree	Strongly Agree	Strongly Agree	Strongly Agree
308	Male	21-25	UG	Intern	South India	INSIDE INDIA	Yes	Academic courses		Yes	Yes	Practical application of telerehabilitation techniques		Strongly Agree	Strongly Agree	Strongly Agree	Strongly Disagree	Strongly Disagree	Disagree	Strongly Agree	Strongly Disagree	Disagree	Strongly Agree	Disagree	Strongly Agree	Neutral	Agree	Agree	Strongly Agree	Disagree	Strongly Agree	Agree	Neutral	Agree	Neutral	Strongly Agree	Neutral	Strongly Agree	Neutral	Strongly Agree	Strongly Agree	Strongly Agree	Strongly Agree	Neutral	Neutral	Strongly Agree	Strongly Agree	Strongly Agree
309	Female	21-25	UG	3rd Year	Middle East	OUTSIDE INDIA	No		Lack of exposure/information
310	Male	21-25	UG	3rd Year	Southeast Asia	OUTSIDE INDIA	No		Lack of exposure/information
311	Male	21-25	UG	3rd Year	Southeast Asia	OUTSIDE INDIA	No		Lack of exposure/information
312	Male	21-25	UG	3rd Year	Middle East	OUTSIDE INDIA	No		Lack of exposure/information
313	Female	21-25	UG	3rd Year	South Asia	OUTSIDE INDIA	No		Lack of exposure/information
314	Male	21-25	UG	3rd Year	Southeast Asia	OUTSIDE INDIA	No		Lack of exposure/information
315	Male	18-20	UG	3rd Year	Middle East	OUTSIDE INDIA	No		Lack of exposure/information
316	Female	21-25	UG	3rd Year	Southeast Asia	OUTSIDE INDIA	No		Lack of exposure/information
317	Male	18-20	UG	3rd Year	Southeast Asia	OUTSIDE INDIA	No		Lack of exposure/information
318	Male	21-25	UG	3rd Year	Southeast Asia	OUTSIDE INDIA	No		Lack of exposure/information
319	Female	21-25	UG	3rd Year	Europe	OUTSIDE INDIA	Yes	Social media		No	Yes	Patient assessment and monitoring through telehealth		Strongly Disagree	Strongly Disagree	Disagree	Agree	Agree	Strongly Disagree	Agree	Agree	Strongly Disagree	Strongly Disagree	Agree	Neutral	Agree	Agree	Agree	Neutral	Agree	Agree	Agree	Agree	Neutral	Agree	Agree	Agree	Neutral	Neutral	Neutral	Agree	Agree	Neutral	Agree	Agree	Neutral	Agree	Agree
320	Male	21-25	UG	3rd Year	Middle East	OUTSIDE INDIA	Yes	Social media		No	Yes	Practical application of telerehabilitation techniques		Strongly Disagree	Strongly Disagree	Strongly Agree	Strongly Agree	Strongly Disagree	Strongly Disagree	Strongly Agree	Agree	Strongly Disagree	Strongly Agree	Strongly Agree	Strongly Agree	Strongly Agree	Strongly Agree	Strongly Agree	Strongly Agree	Neutral	Strongly Agree	Strongly Agree	Agree	Agree	Strongly Disagree	Strongly Agree	Strongly Agree	Strongly Agree	Neutral	Strongly Agree	Strongly Agree	Strongly Agree	Strongly Agree	Strongly Agree	Strongly Agree	Strongly Agree	Neutral	Strongly Agree
321	Female	>25	UG	3rd Year	Oceania	OUTSIDE INDIA	Yes	Workshops or seminars		No	Yes	Practical application of telerehabilitation techniques		Strongly Disagree	Strongly Disagree	Strongly Disagree	Strongly Disagree	Strongly Agree	Strongly Agree	Strongly Agree	Strongly Disagree	Strongly Agree	Strongly Disagree	Strongly Disagree	Neutral	Strongly Agree	Strongly Agree	Strongly Agree	Neutral	Strongly Agree	Strongly Agree	Strongly Agree	Neutral	Neutral	Strongly Disagree	Strongly Agree	Strongly Agree	Strongly Agree	Neutral	Neutral	Neutral	Strongly Agree	Neutral	Strongly Agree	Neutral	Strongly Agree	Strongly Agree	Neutral
322	Male	21-25	UG	4th Year	Middle East	OUTSIDE INDIA	No		Lack of exposure/information
323	Male	>25	UG	Intern	South Asia	OUTSIDE INDIA	Yes	Workshops or seminars		No	Yes	Practical application of telerehabilitation techniques		Strongly Disagree	Strongly Disagree	Strongly Disagree	Strongly Disagree	Strongly Disagree	Strongly Disagree	Strongly Disagree	Strongly Disagree	Strongly Disagree	Strongly Disagree	Strongly Disagree	Strongly Agree	Strongly Agree	Strongly Agree	Strongly Agree	Strongly Agree	Strongly Agree	Strongly Agree	Strongly Agree	Agree	Agree	Strongly Disagree	Strongly Agree	Strongly Agree	Strongly Agree	Strongly Agree	Strongly Agree	Strongly Agree	Strongly Agree	Strongly Agree	Strongly Agree	Strongly Agree	Strongly Agree	Strongly Agree	Strongly Agree
324	Male	21-25	UG	4th Year	Southeast Asia	OUTSIDE INDIA	No		Lack of exposure/information
325	Male	21-25	UG	4th Year	Southeast Asia	OUTSIDE INDIA	No		Limited interest in healthcare topics
326	Female	21-25	UG	Intern	Southeast Asia	OUTSIDE INDIA	Yes	Social media		No	No		Prefer traditional in-person instruction	Strongly Disagree	Strongly Disagree	Strongly Disagree	Disagree	Disagree	Disagree	Strongly Agree	Agree	Strongly Agree	Disagree	Strongly Agree	Strongly Agree	Strongly Agree	Strongly Agree	Strongly Agree	Strongly Agree	Neutral	Neutral	Strongly Agree	Neutral	Strongly Agree	Neutral	Strongly Agree	Strongly Agree	Strongly Agree	Strongly Agree	Strongly Agree	Strongly Agree	Strongly Agree	Strongly Agree	Strongly Agree	Strongly Agree	Strongly Agree	Strongly Agree	Strongly Agree
327	Female	21-25	UG	Intern	Southeast Asia	OUTSIDE INDIA	No		Lack of exposure/information
328	Male	21-25	UG	4th Year	Middle East	OUTSIDE INDIA	No		Lack of exposure/information
329	Female	21-25	UG	Intern	Oceania	OUTSIDE INDIA	Yes	Workshops or seminars		No	Yes	Practical application of telerehabilitation techniques		Strongly Disagree	Disagree	Strongly Disagree	Strongly Disagree	Strongly Disagree	Strongly Disagree	Strongly Agree	Agree	Strongly Disagree	Strongly Disagree	Strongly Disagree	Strongly Agree	Strongly Agree	Agree	Strongly Agree	Strongly Agree	Neutral	Strongly Agree	Agree	Strongly Agree	Strongly Agree	Neutral	Strongly Agree	Strongly Agree	Neutral	Strongly Agree	Neutral	Strongly Agree	Strongly Agree	Neutral	Neutral	Neutral	Neutral	Neutral	Neutral
330	Male	21-25	UG	4th Year	South Asia	OUTSIDE INDIA	No		Lack of exposure/information
331	Female	21-25	UG	Intern	Middle East	OUTSIDE INDIA	Yes	Social media		No	Yes	Practical application of telerehabilitation techniques		Strongly Disagree	Strongly Disagree	Strongly Agree	Strongly Disagree	Strongly Disagree	Disagree	Disagree	Strongly Disagree	Strongly Disagree	Strongly Disagree	Strongly Disagree	Strongly Agree	Strongly Agree	Strongly Agree	Strongly Agree	Strongly Agree	Neutral	Neutral	Agree	Neutral	Neutral	Neutral	Neutral	Neutral	Disagree	Neutral	Strongly Agree	Strongly Agree	Strongly Agree	Strongly Agree	Strongly Agree	Strongly Agree	Neutral	Strongly Agree	Strongly Agree
332	Female	21-25	UG	4th Year	Southeast Asia	OUTSIDE INDIA	Yes	Workshops or seminars		No	Yes	Practical application of telerehabilitation techniques		Strongly Disagree	Strongly Disagree	Strongly Disagree	Agree	Disagree	Disagree	Agree	Agree	Disagree	Strongly Disagree	Disagree	Agree	Agree	Agree	Disagree	Agree	Disagree	Agree	Agree	Agree	Agree	Agree	Agree	Agree	Agree	Neutral	Agree	Neutral	Agree	Agree	Agree	Agree	Agree	Agree	Agree
333	Female	21-25	UG	4th Year	South Asia	OUTSIDE INDIA	No		Lack of exposure/information
334	Male	>25	UG	4th Year	Middle East	OUTSIDE INDIA	Yes	Social media		No	Yes	Practical application of telerehabilitation techniques		Strongly Disagree	Agree	Agree	Strongly Disagree	Disagree	Strongly Disagree	Strongly Disagree	Agree	Agree	Agree	Strongly Disagree	Neutral	Agree	Agree	Strongly Agree	Agree	Disagree	Disagree	Agree	Agree	Agree	Agree	Agree	Neutral	Agree	Agree	Agree	Agree	Agree	Neutral	Disagree	Neutral	Neutral	Agree	Agree
335	Female	21-25	UG	Intern	Oceania	OUTSIDE INDIA	Yes	Academic courses		No	Yes	Patient assessment and monitoring through telehealth		Strongly Disagree	Strongly Agree	Strongly Disagree	Strongly Agree	Strongly Agree	Strongly Disagree	Disagree	Agree	Disagree	Strongly Disagree	Strongly Disagree	Strongly Agree	Strongly Agree	Strongly Agree	Strongly Agree	Strongly Agree	Neutral	Strongly Agree	Strongly Agree	Strongly Agree	Strongly Agree	Strongly Agree	Strongly Agree	Strongly Agree	Neutral	Neutral	Strongly Agree	Strongly Agree	Strongly Agree	Strongly Agree	Strongly Agree	Strongly Agree	Strongly Agree	Strongly Agree	Strongly Agree
336	Female	21-25	UG	4th Year	Southeast Asia	OUTSIDE INDIA	Yes	Social media		No	Yes	Practical application of telerehabilitation techniques		Strongly Disagree	Strongly Disagree	Strongly Disagree	Agree	Disagree	Strongly Disagree	Agree	Strongly Disagree	Strongly Disagree	Strongly Disagree	Strongly Disagree	Neutral	Neutral	Agree	Strongly Agree	Agree	Disagree	Neutral	Agree	Neutral	Agree	Agree	Agree	Neutral	Neutral	Neutral	Neutral	Neutral	Agree	Agree	Neutral	Neutral	Agree	Agree	Agree
337	Male	21-25	UG	Intern	Southeast Asia	OUTSIDE INDIA	Yes	Workshops or seminars		Yes	Yes	Patient assessment and monitoring through telehealth		Strongly Disagree	Strongly Disagree	Strongly Agree	Strongly Agree	Strongly Agree	Strongly Disagree	Strongly Agree	Agree	Strongly Disagree	Strongly Disagree	Strongly Agree	Strongly Agree	Neutral	Strongly Disagree	Strongly Agree	Neutral	Strongly Agree	Neutral	Agree	Strongly Agree	Strongly Agree	Neutral	Neutral	Neutral	Neutral	Neutral	Neutral	Neutral	Neutral	Neutral	Neutral	Neutral	Neutral	Neutral	Neutral
338	Male	21-25	UG	3rd Year	Middle East	OUTSIDE INDIA	No		Lack of exposure/information
339	Female	21-25	UG	2nd Year	Europe	OUTSIDE INDIA	Yes	Social media		No	Yes	Patient assessment and monitoring through telehealth		Strongly Disagree	Strongly Disagree	Agree	Strongly Disagree	Agree	Strongly Disagree	Strongly Disagree	Strongly Disagree	Strongly Disagree	Strongly Disagree	Strongly Disagree	Neutral	Neutral	Strongly Disagree	Agree	Agree	Neutral	Agree	Agree	Agree	Agree	Agree	Agree	Agree	Agree	Agree	Agree	Agree	Agree	Agree	Agree	Agree	Agree	Neutral	Agree
340	Male	21-25	UG	3rd Year	Southeast Asia	OUTSIDE INDIA	No		Lack of exposure/information
341	Male	>25	UG	Intern	Southeast Asia	OUTSIDE INDIA	Yes	Social media		No	Yes	Practical application of telerehabilitation techniques		Strongly Disagree	Strongly Disagree	Strongly Disagree	Agree	Strongly Disagree	Strongly Disagree	Strongly Disagree	Agree	Strongly Agree	Agree	Agree	Neutral	Neutral	Agree	Agree	Agree	Agree	Agree	Agree	Agree	Agree	Agree	Agree	Agree	Agree	Agree	Agree	Agree	Agree	Agree	Agree	Agree	Agree	Agree	Agree
342	Male	21-25	UG	3rd Year	Middle East	OUTSIDE INDIA	No		Lack of exposure/information
343	Male	21-25	UG	3rd Year	Oceania	OUTSIDE INDIA	No		Lack of exposure/information
344	Male	21-25	UG	3rd Year	Southeast Asia	OUTSIDE INDIA	Yes	Academic courses		No	Yes	Practical application of telerehabilitation techniques		Disagree	Strongly Disagree	Agree	Agree	Disagree	Strongly Disagree	Agree	Agree	Strongly Disagree	Strongly Disagree	Disagree	Agree	Agree	Agree	Strongly Agree	Agree	Neutral	Neutral	Agree	Neutral	Agree	Agree	Agree	Agree	Neutral	Neutral	Neutral	Neutral	Neutral	Neutral	Neutral	Neutral	Agree	Agree	Agree
345	Female	>25	UG	Intern	Europe	OUTSIDE INDIA	No		Limited interest in healthcare topics
346	Female	21-25	UG	Intern	Southeast Asia	OUTSIDE INDIA	Yes	Academic courses		No	Yes	Practical application of telerehabilitation techniques		Strongly Disagree	Strongly Disagree	Strongly Disagree	Strongly Disagree	Strongly Disagree	Strongly Agree	Strongly Agree	Agree	Strongly Disagree	Strongly Disagree	Strongly Disagree	Strongly Agree	Strongly Agree	Strongly Agree	Strongly Agree	Strongly Agree	Neutral	Neutral	Agree	Neutral	Neutral	Neutral	Strongly Agree	Strongly Agree	Strongly Agree	Strongly Agree	Strongly Agree	Strongly Agree	Strongly Agree	Strongly Agree	Neutral	Neutral	Strongly Agree	Strongly Agree	Strongly Agree
347	Female	21-25	UG	Intern	Southeast Asia	OUTSIDE INDIA	Yes	Workshops or seminars		No	Yes	Patient assessment and monitoring through telehealth		Strongly Disagree	Strongly Agree	Strongly Disagree	Strongly Agree	Strongly Disagree	Disagree	Strongly Agree	Agree	Strongly Disagree	Strongly Agree	Strongly Disagree	Neutral	Strongly Agree	Strongly Agree	Strongly Agree	Strongly Agree	Neutral	Strongly Agree	Strongly Agree	Strongly Agree	Neutral	Strongly Agree	Strongly Agree	Strongly Agree	Strongly Agree	Strongly Agree	Strongly Agree	Strongly Agree	Strongly Agree	Strongly Agree	Strongly Agree	Strongly Agree	Strongly Agree	Strongly Agree	Strongly Agree
348	Female	21-25	UG	Intern	Southeast Asia	OUTSIDE INDIA	Yes	Social media		No	Yes	Practical application of telerehabilitation techniques		Agree	Agree	Agree	Agree	Agree	Strongly Disagree	Agree	Strongly Disagree	Strongly Disagree	Strongly Disagree	Strongly Disagree	Neutral	Neutral	Neutral	Strongly Agree	Neutral	Neutral	Neutral	Agree	Neutral	Neutral	Agree	Agree	Agree	Neutral	Neutral	Neutral	Neutral	Neutral	Neutral	Neutral	Neutral	Neutral	Neutral	Neutral
349	Female	21-25	UG	4th Year	Southeast Asia	OUTSIDE INDIA	No		Lack of exposure/information
350	Female	21-25	UG	4th Year	Southeast Asia	OUTSIDE INDIA	No		Lack of exposure/information
351	Male	21-25	UG	4th Year	Middle East	OUTSIDE INDIA	No		Limited interest in healthcare topics
352	Female	21-25	UG	Intern	Southeast Asia	OUTSIDE INDIA	Yes	Social media		No	Yes	Patient assessment and monitoring through telehealth		Disagree	Strongly Agree	Disagree	Disagree	Disagree	Disagree	Strongly Agree	Agree	Disagree	Strongly Agree	Disagree	Neutral	Strongly Agree	Strongly Agree	Strongly Agree	Strongly Agree	Disagree	Neutral	Strongly Agree	Neutral	Strongly Agree	Strongly Agree	Strongly Agree	Strongly Agree	Strongly Agree	Strongly Agree	Strongly Agree	Strongly Agree	Strongly Agree	Strongly Agree	Strongly Agree	Strongly Agree	Strongly Agree	Strongly Agree	Strongly Agree
353	Female	21-25	UG	4th Year	Southeast Asia	OUTSIDE INDIA	Yes	Social media		No	No		Prefer traditional in-person instruction	Agree	Disagree	Strongly Disagree	Agree	Disagree	Strongly Disagree	Agree	Agree	Disagree	Disagree	Disagree	Neutral	Agree	Agree	Strongly Agree	Agree	Neutral	Disagree	Disagree	Agree	Neutral	Disagree	Agree	Agree	Agree	Disagree	Neutral	Disagree	Agree	Agree	Agree	Agree	Neutral	Agree	Agree
354	Female	21-25	UG	Intern	Middle East	OUTSIDE INDIA	Yes	Social media		No	Yes	Practical application of telerehabilitation techniques		Disagree	Disagree	Disagree	Strongly Agree	Disagree	Strongly Agree	Strongly Agree	Strongly Disagree	Strongly Agree	Strongly Agree	Strongly Agree	Strongly Agree	Strongly Agree	Strongly Agree	Strongly Agree	Disagree	Disagree	Strongly Agree	Strongly Agree	Strongly Agree	Strongly Agree	Strongly Agree	Strongly Agree	Strongly Agree	Strongly Agree	Strongly Agree	Strongly Agree	Strongly Agree	Strongly Agree	Strongly Agree	Strongly Agree	Strongly Agree	Strongly Agree	Strongly Agree	Strongly Agree
355	Female	21-25	UG	4th Year	Middle East	OUTSIDE INDIA	Yes	Workshops or seminars		No	Yes	Practical application of telerehabilitation techniques		Strongly Disagree	Strongly Disagree	Disagree	Strongly Disagree	Disagree	Strongly Disagree	Agree	Agree	Disagree	Agree	Agree	Agree	Neutral	Neutral	Agree	Agree	Neutral	Agree	Agree	Agree	Neutral	Neutral	Neutral	Neutral	Agree	Agree	Agree	Agree	Neutral	Agree	Neutral	Neutral	Neutral	Agree	Agree
356	Male	21-25	UG	2nd Year	Southeast Asia	OUTSIDE INDIA	No		Lack of exposure/information
357	Female	21-25	UG	3rd Year	South Asia	OUTSIDE INDIA	No		Lack of exposure/information
358	Female	21-25	UG	3rd Year	Middle East	OUTSIDE INDIA	No		Lack of exposure/information
359	Female	21-25	UG	3rd Year	Southeast Asia	OUTSIDE INDIA	Yes	Academic courses		No	Yes	Patient assessment and monitoring through telehealth		Strongly Disagree	Strongly Disagree	Strongly Agree	Strongly Agree	Disagree	Disagree	Strongly Agree	Agree	Disagree	Strongly Agree	Strongly Agree	Strongly Agree	Strongly Agree	Strongly Agree	Strongly Agree	Strongly Agree	Strongly Agree	Strongly Agree	Strongly Agree	Strongly Agree	Strongly Agree	Strongly Agree	Strongly Agree	Strongly Agree	Strongly Agree	Strongly Agree	Strongly Agree	Strongly Agree	Strongly Agree	Strongly Agree	Strongly Agree	Strongly Agree	Strongly Agree	Strongly Agree	Strongly Agree
360	Female	21-25	UG	3rd Year	Southeast Asia	OUTSIDE INDIA	Yes	Workshops or seminars		No	Yes	Practical application of telerehabilitation techniques		Strongly Disagree	Strongly Disagree	Strongly Agree	Disagree	Disagree	Disagree	Strongly Agree	Agree	Disagree	Strongly Agree	Disagree	Strongly Agree	Strongly Agree	Strongly Agree	Strongly Agree	Strongly Agree	Strongly Agree	Strongly Agree	Strongly Agree	Strongly Agree	Strongly Agree	Strongly Agree	Strongly Agree	Strongly Agree	Strongly Agree	Strongly Agree	Strongly Agree	Strongly Agree	Strongly Agree	Strongly Agree	Strongly Agree	Strongly Agree	Strongly Agree	Strongly Agree	Strongly Agree
361	Male	21-25	UG	2nd Year	Europe	OUTSIDE INDIA	Yes	Social media		No	Yes	Practical application of telerehabilitation techniques		Strongly Disagree	Strongly Disagree	Strongly Agree	Strongly Agree	Strongly Disagree	Strongly Disagree	Strongly Disagree	Agree	Strongly Disagree	Strongly Agree	Strongly Agree	Strongly Agree	Strongly Agree	Strongly Agree	Strongly Agree	Strongly Agree	Neutral	Strongly Agree	Strongly Agree	Strongly Agree	Strongly Agree	Strongly Agree	Strongly Agree	Strongly Agree	Strongly Agree	Strongly Agree	Neutral	Strongly Agree	Strongly Agree	Strongly Agree	Strongly Agree	Strongly Agree	Strongly Agree	Strongly Agree	Neutral
362	Female	18-20	UG	2nd Year	North India	INSIDE INDIA	Yes	Social media		No	Yes	Practical application of telerehabilitation techniques		Agree	Agree	Agree	Agree	Agree	Disagree	Agree	Agree	Disagree	Agree	Disagree	Agree	Agree	Agree	Strongly Agree	Neutral	Disagree	Neutral	Agree	Agree	Agree	Agree	Neutral	Neutral	Agree	Neutral	Agree	Neutral	Neutral	Agree	Neutral	Neutral	Neutral	Agree	Agree
363	Female	21-25	UG	Intern	South India	INSIDE INDIA	Yes	Workshops or seminars		No	Yes	Patient assessment and monitoring through telehealth		Strongly Agree	Strongly Agree	Strongly Agree	Strongly Agree	Strongly Agree	Strongly Agree	Strongly Agree	Agree	Strongly Agree	Strongly Agree	Strongly Agree	Neutral	Neutral	Neutral	Strongly Agree	Strongly Agree	Neutral	Strongly Agree	Agree	Strongly Agree	Strongly Agree	Strongly Agree	Strongly Agree	Strongly Agree	Strongly Agree	Neutral	Strongly Agree	Strongly Agree	Strongly Agree	Strongly Agree	Strongly Agree	Strongly Agree	Strongly Agree	Strongly Agree	Strongly Agree
364	Male	21-25	UG	4th Year	South India	INSIDE INDIA	No		Lack of exposure/information
365	Male	21-25	PG	2nd Year	South India	INSIDE INDIA	Yes	Workshops or seminars		No	Yes	Practical application of telerehabilitation techniques		Agree	Agree	Agree	Strongly Disagree	Disagree	Disagree	Strongly Disagree	Agree	Disagree	Strongly Disagree	Disagree	Agree	Agree	Agree	Agree	Agree	Disagree	Neutral	Agree	Agree	Agree	Agree	Agree	Disagree	Neutral	Neutral	Agree	Neutral	Neutral	Agree	Disagree	Neutral	Neutral	Agree	Agree
366	Male	21-25	UG	4th Year	North India	INSIDE INDIA	No		Insufficient educational background
367	Female	21-25	UG	3rd Year	North East India	INSIDE INDIA	No		Lack of exposure/information
368	Female	21-25	UG	3rd Year	North India	INSIDE INDIA	Yes	Academic courses		Yes	Yes	Practical application of telerehabilitation techniques		Agree	Agree	Agree	Agree	Agree	Agree	Agree	Agree	Agree	Agree	Agree	Agree	Agree	Agree	Agree	Agree	Agree	Agree	Agree	Agree	Agree	Agree	Agree	Agree	Agree	Agree	Agree	Agree	Agree	Agree	Agree	Agree	Agree	Agree	Agree
369	Female	18-20	UG	3rd Year	North East India	INSIDE INDIA	Yes	Research articles		Yes	Yes	Legal and ethical considerations		Strongly Agree	Strongly Agree	Strongly Agree	Strongly Agree	Strongly Agree	Strongly Agree	Strongly Agree	Agree	Strongly Agree	Strongly Agree	Strongly Agree	Strongly Agree	Strongly Agree	Strongly Agree	Strongly Agree	Strongly Agree	Strongly Agree	Strongly Agree	Strongly Agree	Strongly Agree	Strongly Agree	Strongly Agree	Strongly Agree	Strongly Agree	Strongly Agree	Strongly Agree	Strongly Agree	Strongly Agree	Strongly Agree	Strongly Agree	Strongly Agree	Strongly Agree	Strongly Agree	Strongly Agree	Strongly Agree
370	Female	21-25	Ph.d.,		South India	INSIDE INDIA	Yes	Research articles		No	Yes	Patient assessment and monitoring through telehealth		Agree	Agree	Strongly Disagree	Agree	Disagree	Agree	Agree	Strongly Disagree	Disagree	Agree	Disagree	Neutral	Agree	Agree	Strongly Disagree	Agree	Disagree	Neutral	Agree	Agree	Agree	Agree	Neutral	Disagree	Agree	Disagree	Neutral	Neutral	Agree	Agree	Neutral	Agree	Neutral	Agree	Agree
371	Female	21-25	UG	4th Year	Central India	INSIDE INDIA	No		Insufficient educational background
372	Female	21-25	UG	3rd Year	North India	INSIDE INDIA	No		Lack of exposure/information
373	Male	21-25	PG	1st Year	West India	INSIDE INDIA	No		Limited interest in healthcare topics
374	Female	21-25	UG	3rd Year	North India	INSIDE INDIA	Yes	Workshops or seminars		Yes	No		Lack of time or resources	Strongly Disagree	Strongly Disagree	Strongly Disagree	Strongly Disagree	Strongly Disagree	Strongly Disagree	Strongly Disagree	Strongly Disagree	Strongly Disagree	Strongly Disagree	Strongly Disagree	Neutral	Neutral	Neutral	Strongly Agree	Disagree	Neutral	Neutral	Strongly Disagree	Neutral	Agree	Neutral	Neutral	Neutral	Agree	Disagree	Agree	Agree	Agree	Agree	Agree	Agree	Agree	Neutral	Strongly Disagree
375	Female	21-25	UG	Intern	South India	INSIDE INDIA	Yes	Academic courses		No	Yes	Practical application of telerehabilitation techniques		Strongly Disagree	Strongly Disagree	Strongly Disagree	Strongly Disagree	Strongly Disagree	Strongly Disagree	Strongly Disagree	Strongly Disagree	Strongly Disagree	Strongly Disagree	Strongly Disagree	Neutral	Neutral	Neutral	Strongly Agree	Neutral	Neutral	Neutral	Strongly Disagree	Neutral	Neutral	Neutral	Neutral	Neutral	Neutral	Neutral	Neutral	Neutral	Neutral	Neutral	Neutral	Neutral	Neutral	Neutral	Neutral
376	Male	21-25	UG	3rd Year	East India	INSIDE INDIA	No		Insufficient educational background
377	Female	18-20	UG	1st Year	Central India	INSIDE INDIA	No		Lack of exposure/information
378	Male	21-25	UG	2nd Year	West India	INSIDE INDIA	Yes	Workshops or seminars		No	Yes	Practical application of telerehabilitation techniques		Strongly Disagree	Disagree	Disagree	Strongly Disagree	Agree	Strongly Disagree	Agree	Agree	Strongly Disagree	Strongly Disagree	Disagree	Agree	Agree	Agree	Agree	Agree	Disagree	Agree	Strongly Disagree	Agree	Agree	Agree	Neutral	Neutral	Agree	Neutral	Agree	Agree	Agree	Agree	Agree	Agree	Agree	Agree	Agree
379	Male	>25	PG	2nd Year	East India	INSIDE INDIA	Yes	Social media		No	Yes	Practical application of telerehabilitation techniques		Agree	Agree	Agree	Strongly Disagree	Strongly Disagree	Agree	Agree	Strongly Disagree	Strongly Disagree	Disagree	Agree	Neutral	Agree	Neutral	Strongly Agree	Neutral	Agree	Disagree	Strongly Disagree	Agree	Neutral	Neutral	Agree	Neutral	Agree	Agree	Agree	Neutral	Neutral	Agree	Neutral	Agree	Agree	Agree	Agree
380	Male	>25	PG	1st Year	Central India	INSIDE INDIA	Yes	Research articles		Yes	Yes	Patient assessment and monitoring through telehealth		Strongly Disagree	Disagree	Disagree	Strongly Disagree	Disagree	Disagree	Disagree	Disagree	Disagree	Disagree	Disagree	Disagree	Disagree	Neutral	Strongly Agree	Neutral	Strongly Agree	Strongly Agree	Strongly Agree	Strongly Agree	Strongly Agree	Strongly Agree	Strongly Agree	Strongly Agree	Strongly Agree	Strongly Agree	Strongly Agree	Strongly Agree	Strongly Agree	Strongly Agree	Strongly Agree	Strongly Agree	Strongly Agree	Strongly Agree	Strongly Agree
381	Male	21-25	UG	3rd Year	North India	INSIDE INDIA	Yes	Academic courses		No	Yes	Patient assessment and monitoring through telehealth		Strongly Disagree	Strongly Agree	Strongly Disagree	Strongly Disagree	Disagree	Strongly Disagree	Strongly Agree	Strongly Disagree	Disagree	Strongly Agree	Strongly Disagree	Neutral	Neutral	Neutral	Strongly Agree	Neutral	Neutral	Neutral	Strongly Disagree	Neutral	Neutral	Strongly Agree	Strongly Agree	Strongly Agree	Neutral	Strongly Agree	Strongly Agree	Strongly Agree	Strongly Agree	Neutral	Neutral	Neutral	Neutral	Strongly Agree	Strongly Agree
382	Female	21-25	UG	2nd Year	North East India	INSIDE INDIA	Yes	Workshops or seminars		No	Yes	Patient assessment and monitoring through telehealth		Strongly Agree	Strongly Agree	Strongly Agree	Strongly Agree	Strongly Agree	Strongly Agree	Strongly Agree	Agree	Strongly Agree	Strongly Agree	Strongly Agree	Strongly Agree	Strongly Agree	Strongly Agree	Strongly Agree	Strongly Agree	Strongly Agree	Strongly Agree	Strongly Agree	Strongly Agree	Strongly Agree	Strongly Agree	Strongly Agree	Strongly Agree	Strongly Agree	Strongly Agree	Strongly Agree	Strongly Agree	Strongly Agree	Strongly Agree	Strongly Agree	Strongly Agree	Strongly Agree	Strongly Agree	Strongly Agree
383	Female	21-25	UG	2nd Year	South India	INSIDE INDIA	No		Lack of exposure/information
384	Male	>25	UG	2nd Year	West India	INSIDE INDIA	No		Lack of exposure/information
385	Female	21-25	UG	Intern	East India	INSIDE INDIA	Yes	Workshops or seminars		No	Yes	Patient assessment and monitoring through telehealth		Strongly Disagree	Agree	Strongly Disagree	Strongly Disagree	Strongly Disagree	Strongly Disagree	Agree	Agree	Strongly Disagree	Agree	Strongly Disagree	Agree	Neutral	Agree	Strongly Agree	Neutral	Neutral	Neutral	Agree	Neutral	Neutral	Neutral	Neutral	Neutral	Agree	Neutral	Neutral	Neutral	Neutral	Agree	Neutral	Neutral	Neutral	Neutral	Agree
386	Female	21-25	UG	Intern	North East India	INSIDE INDIA	Yes	Social media		No	Yes	Patient assessment and monitoring through telehealth		Strongly Agree	Strongly Agree	Strongly Disagree	Strongly Disagree	Disagree	Disagree	Disagree	Agree	Disagree	Strongly Agree	Disagree	Neutral	Neutral	Strongly Agree	Strongly Agree	Neutral	Neutral	Neutral	Strongly Agree	Strongly Agree	Neutral	Strongly Agree	Strongly Agree	Strongly Agree	Neutral	Neutral	Strongly Agree	Strongly Agree	Strongly Agree	Neutral	Disagree	Neutral	Neutral	Strongly Agree	Strongly Agree
387	Female	21-25	UG	4th Year	Central India	INSIDE INDIA	No		Lack of exposure/information
388	Male	21-25	PG	2nd Year	West India	INSIDE INDIA	Yes	Workshops or seminars		No	Yes	Practical application of telerehabilitation techniques		Agree	Agree	Strongly Disagree	Strongly Disagree	Disagree	Strongly Disagree	Agree	Agree	Disagree	Disagree	Strongly Disagree	Disagree	Agree	Agree	Agree	Agree	Neutral	Disagree	Agree	Agree	Agree	Agree	Agree	Agree	Agree	Neutral	Agree	Agree	Agree	Agree	Agree	Neutral	Neutral	Agree	Agree
389	Male	>25	PG	2nd Year	East India	INSIDE INDIA	Yes	Academic courses		Yes	Yes	Practical application of telerehabilitation techniques		Agree	Agree	Strongly Disagree	Agree	Disagree	Agree	Agree	Agree	Agree	Agree	Agree	Agree	Agree	Agree	Agree	Agree	Agree	Agree	Agree	Agree	Agree	Agree	Agree	Agree	Agree	Agree	Agree	Agree	Agree	Agree	Agree	Agree	Agree	Agree	Agree
390	Male	>25	Ph.d.,		South India	INSIDE INDIA	Yes	Research articles		Yes	Yes	Practical application of telerehabilitation techniques		Agree	Agree	Agree	Agree	Agree	Agree	Agree	Agree	Agree	Agree	Agree	Agree	Agree	Agree	Agree	Agree	Agree	Agree	Agree	Agree	Agree	Agree	Agree	Agree	Agree	Agree	Agree	Agree	Agree	Agree	Agree	Agree	Agree	Agree	Agree
391	Male	18-20	UG	3rd Year	Central India	INSIDE INDIA	Yes	Social media		Yes	Yes	Practical application of telerehabilitation techniques		Strongly Agree	Strongly Agree	Strongly Agree	Strongly Agree	Strongly Agree	Strongly Agree	Strongly Agree	Agree	Strongly Agree	Strongly Agree	Strongly Agree	Strongly Agree	Strongly Agree	Strongly Agree	Strongly Agree	Strongly Agree	Strongly Agree	Strongly Agree	Strongly Agree	Strongly Agree	Strongly Agree	Strongly Agree	Strongly Agree	Strongly Agree	Strongly Agree	Strongly Agree	Strongly Agree	Strongly Agree	Strongly Agree	Strongly Agree	Strongly Agree	Strongly Agree	Strongly Agree	Strongly Agree	Strongly Agree
392	Male	21-25	UG	3rd Year	West India	INSIDE INDIA	Yes	Academic courses		Yes	Yes	Practical application of telerehabilitation techniques		Agree	Strongly Disagree	Agree	Agree	Strongly Disagree	Strongly Disagree	Agree	Agree	Agree	Agree	Agree	Agree	Agree	Agree	Agree	Agree	Neutral	Neutral	Agree	Agree	Agree	Agree	Agree	Agree	Agree	Agree	Agree	Agree	Agree	Agree	Disagree	Agree	Agree	Agree	Agree
393	Male	21-25	UG	Intern	East India	INSIDE INDIA	Yes	Workshops or seminars		No	Yes	Practical application of telerehabilitation techniques		Strongly Agree	Strongly Agree	Strongly Agree	Strongly Agree	Strongly Disagree	Strongly Agree	Strongly Agree	Agree	Strongly Agree	Strongly Agree	Strongly Agree	Strongly Agree	Strongly Agree	Strongly Agree	Strongly Agree	Strongly Agree	Strongly Agree	Strongly Agree	Strongly Agree	Neutral	Strongly Agree	Strongly Agree	Strongly Agree	Strongly Agree	Strongly Agree	Strongly Agree	Strongly Agree	Strongly Agree	Strongly Agree	Strongly Agree	Strongly Agree	Strongly Agree	Strongly Agree	Strongly Agree	Strongly Agree
394	Male	21-25	UG	Intern	South India	INSIDE INDIA	Yes	Research articles		Yes	Yes	Practical application of telerehabilitation techniques		Agree	Agree	Strongly Disagree	Agree	Strongly Disagree	Agree	Agree	Agree	Strongly Disagree	Strongly Disagree	Disagree	Agree	Agree	Neutral	Strongly Agree	Agree	Disagree	Agree	Agree	Agree	Agree	Neutral	Agree	Agree	Agree	Neutral	Agree	Agree	Agree	Agree	Agree	Agree	Agree	Agree	Agree
395	Female	21-25	UG	4th Year	North East India	INSIDE INDIA	Yes	Social media		No	Yes	Practical application of telerehabilitation techniques		Strongly Disagree	Strongly Disagree	Strongly Disagree	Agree	Disagree	Disagree	Agree	Strongly Disagree	Disagree	Strongly Disagree	Strongly Disagree	Agree	Agree	Neutral	Strongly Agree	Agree	Neutral	Agree	Agree	Neutral	Agree	Agree	Agree	Neutral	Agree	Agree	Agree	Agree	Agree	Neutral	Agree	Neutral	Agree	Agree	Agree
396	Female	21-25	UG	4th Year	South India	INSIDE INDIA	No		Lack of exposure/information
397	Male	21-25	UG	3rd Year	East India	INSIDE INDIA	No		Lack of exposure/information
398	Female	>25	Ph.d.,		North India	INSIDE INDIA	Yes	Social media		No	Yes	Practical application of telerehabilitation techniques		Agree	Agree	Agree	Agree	Disagree	Disagree	Agree	Agree	Disagree	Disagree	Agree	Agree	Agree	Agree	Strongly Agree	Neutral	Disagree	Agree	Agree	Agree	Agree	Agree	Agree	Agree	Agree	Neutral	Agree	Agree	Agree	Agree	Agree	Agree	Agree	Agree	Agree
399	Female	>25	Ph.d.,		Southeast Asia	OUTSIDE INDIA	Yes	Social media		No	Yes	Practical application of telerehabilitation techniques		Strongly Disagree	Strongly Disagree	Disagree	Disagree	Disagree	Disagree	Agree	Agree	Disagree	Strongly Disagree	Disagree	Agree	Agree	Agree	Agree	Agree	Agree	Agree	Agree	Agree	Neutral	Agree	Agree	Agree	Neutral	Agree	Agree	Agree	Agree	Neutral	Agree	Neutral	Agree	Agree	Agree
400	Female	21-25	Ph.d.,		North India	INSIDE INDIA	Yes	Academic courses		No	Yes	Understanding telecommunication technologies		Agree	Agree	Agree	Agree	Disagree	Agree	Strongly Disagree	Strongly Disagree	Disagree	Strongly Disagree	Strongly Agree	Agree	Neutral	Agree	Strongly Agree	Agree	Neutral	Agree	Agree	Agree	Agree	Agree	Agree	Neutral	Agree	Agree	Agree	Agree	Agree	Agree	Agree	Agree	Agree	Agree	Agree
401	Female	21-25	UG	3rd Year	South India	INSIDE INDIA	No		Lack of exposure/information
402	Female	18-20	UG	2nd Year	North East India	INSIDE INDIA	Yes	Social media		No	Yes	Practical application of telerehabilitation techniques		Agree	Agree	Agree	Agree	Agree	Agree	Agree	Agree	Agree	Agree	Agree	Agree	Agree	Agree	Agree	Agree	Agree	Agree	Agree	Agree	Agree	Agree	Agree	Agree	Agree	Agree	Neutral	Agree	Agree	Agree	Agree	Agree	Agree	Agree	Agree
403	Male	>25	Ph.d.,		South India	INSIDE INDIA	Yes	Research articles		No	Yes	Practical application of telerehabilitation techniques		Agree	Agree	Agree	Agree	Agree	Agree	Agree	Agree	Agree	Agree	Agree	Agree	Agree	Agree	Agree	Agree	Agree	Agree	Agree	Agree	Agree	Agree	Agree	Agree	Neutral	Neutral	Neutral	Neutral	Neutral	Neutral	Neutral	Neutral	Neutral	Neutral	Neutral
404	Female	18-20	UG	2nd Year	West India	INSIDE INDIA	Yes	Social media		No	Yes	Practical application of telerehabilitation techniques		Strongly Agree	Strongly Agree	Strongly Agree	Strongly Agree	Strongly Agree	Strongly Agree	Strongly Agree	Agree	Strongly Agree	Disagree	Strongly Disagree	Strongly Agree	Strongly Agree	Strongly Agree	Strongly Agree	Strongly Agree	Strongly Agree	Disagree	Strongly Agree	Strongly Agree	Strongly Agree	Strongly Agree	Strongly Agree	Strongly Agree	Strongly Agree	Strongly Agree	Strongly Agree	Strongly Agree	Strongly Agree	Strongly Agree	Strongly Agree	Strongly Agree	Strongly Agree	Strongly Agree	Strongly Agree
405	Female	21-25	UG	2nd Year	East India	INSIDE INDIA	Yes	Social media		No	Yes	Patient assessment and monitoring through telehealth		Strongly Disagree	Strongly Agree	Disagree	Strongly Agree	Strongly Agree	Strongly Agree	Strongly Agree	Agree	Strongly Agree	Strongly Agree	Strongly Disagree	Neutral	Neutral	Neutral	Strongly Agree	Strongly Agree	Strongly Agree	Neutral	Strongly Agree	Strongly Agree	Strongly Agree	Disagree	Strongly Agree	Strongly Agree	Strongly Agree	Strongly Agree	Strongly Agree	Agree	Neutral	Strongly Agree	Strongly Agree	Neutral	Strongly Agree	Neutral	Neutral
406	Female	21-25	PG	2nd Year	North East India	INSIDE INDIA	Yes	Social media		No	Yes	Patient assessment and monitoring through telehealth		Disagree	Strongly Disagree	Strongly Disagree	Strongly Agree	Disagree	Disagree	Strongly Disagree	Agree	Strongly Disagree	Strongly Disagree	Strongly Disagree	Strongly Agree	Strongly Agree	Strongly Agree	Strongly Agree	Strongly Agree	Neutral	Strongly Agree	Strongly Agree	Strongly Agree	Neutral	Neutral	Strongly Agree	Strongly Agree	Strongly Agree	Neutral	Strongly Agree	Neutral	Neutral	Strongly Agree	Neutral	Neutral	Strongly Agree	Strongly Agree	Strongly Agree
407	Female	18-20	UG	2nd Year	Central India	INSIDE INDIA	No		Lack of exposure/information
408	Female	21-25	UG	Intern	West India	INSIDE INDIA	Yes	Academic courses		No	Yes	Practical application of telerehabilitation techniques		Strongly Disagree	Strongly Disagree	Strongly Disagree	Strongly Disagree	Strongly Disagree	Strongly Disagree	Strongly Disagree	Strongly Disagree	Disagree	Strongly Disagree	Strongly Disagree	Neutral	Neutral	Neutral	Strongly Agree	Neutral	Neutral	Strongly Agree	Agree	Neutral	Strongly Agree	Strongly Agree	Strongly Agree	Disagree	Strongly Agree	Strongly Agree	Strongly Agree	Strongly Agree	Strongly Agree	Strongly Agree	Strongly Agree	Strongly Agree	Strongly Agree	Strongly Agree	Neutral
409	Female	18-20	UG	2nd Year	East India	INSIDE INDIA	No		Lack of exposure/information
410	Female	21-25	UG	3rd Year	South India	INSIDE INDIA	No		Others
411	Male	18-20	UG	1st Year	South India	INSIDE INDIA	Yes	Social media		No	Yes	Understanding telecommunication technologies		Strongly Agree	Neutral	Neutral	Neutral	Disagree	Neutral	Strongly Agree	Agree	Strongly Agree	Strongly Agree	Neutral	Strongly Agree	Strongly Agree	Neutral	Strongly Agree	Strongly Agree	Neutral	Neutral	Strongly Agree	Strongly Agree	Strongly Agree	Neutral	Neutral	Neutral	Strongly Agree	Neutral	Neutral	Strongly Agree	Neutral	Strongly Agree	Neutral	Strongly Agree	Strongly Agree	Strongly Agree	Strongly Agree
412	Female	21-25	PG	2nd Year	South India	INSIDE INDIA	Yes	Social media		Yes	Yes	Practical application of telerehabilitation techniques		Agree	Agree	Neutral	Neutral	Disagree	Agree	Neutral	Agree	Neutral	Neutral	Neutral	Neutral	Neutral	Agree	Strongly Agree	Agree	Disagree	Neutral	Agree	Neutral	Agree	Neutral	Agree	Neutral	Agree	Agree	Agree	Agree	Agree	Agree	Agree	Agree	Agree	Agree	Agree
413	Male	21-25	PG	2nd Year	North India	INSIDE INDIA	Yes	Academic courses		Yes	Yes	Patient assessment and monitoring through telehealth		Agree	Agree	Agree	Agree	Neutral	Agree	Agree	Neutral	Agree	Disagree	Neutral	Neutral	Neutral	Neutral	Agree	Agree	Disagree	Disagree	Agree	Agree	Neutral	Neutral	Agree	Neutral	Agree	Neutral	Agree	Neutral	Neutral	Agree	Agree	Neutral	Neutral	Neutral	Agree
414	Female	21-25	PG	1st Year	South India	INSIDE INDIA	Yes	Social media		No	Yes	Practical application of telerehabilitation techniques		Neutral	Neutral	Disagree	Disagree	Disagree	Neutral	Neutral	Neutral	Disagree	Neutral	Disagree	Neutral	Neutral	Neutral	Strongly Agree	Neutral	Neutral	Neutral	Agree	Neutral	Neutral	Neutral	Neutral	Neutral	Strongly Agree	Neutral	Neutral	Neutral	Strongly Agree	Strongly Agree	Disagree	Disagree	Neutral	Neutral	Neutral
415	Female	>25	Ph.d.,		Central India	INSIDE INDIA	Yes	Research articles		No	No		Prefer traditional in-person instruction	Agree	Agree	Agree	Agree	Agree	Agree	Agree	Agree	Agree	Agree	Agree	Agree	Agree	Agree	Agree	Agree	Agree	Agree	Agree	Agree	Agree	Agree	Agree	Agree	Agree	Agree	Agree	Agree	Agree	Agree	Agree	Agree	Agree	Agree	Agree
416	Female	21-25	PG	1st Year	West India	INSIDE INDIA	Yes	Social media		No	No		Already knowledgeable on the subject	Agree	Agree	Agree	Agree	Agree	Agree	Agree	Agree	Agree	Agree	Agree	Neutral	Disagree	Neutral	Agree	Agree	Neutral	Disagree	Disagree	Disagree	Agree	Agree	Agree	Agree	Neutral	Disagree	Agree	Agree	Agree	Agree	Agree	Agree	Agree	Agree	Agree
417	Female	21-25	UG	Intern	East India	INSIDE INDIA	No		Insufficient educational background
418	Female	21-25	UG	4th Year	North India	INSIDE INDIA	No		Lack of exposure/information
419	Male	21-25	PG	1st Year	South India	INSIDE INDIA	Yes	Social media		No	Yes	Patient assessment and monitoring through telehealth		Agree	Agree	Agree	Neutral	Agree	Agree	Agree	Neutral	Neutral	Neutral	Agree	Agree	Agree	Agree	Agree	Agree	Agree	Agree	Agree	Neutral	Agree	Agree	Neutral	Agree	Agree	Neutral	Neutral	Agree	Agree	Neutral	Agree	Neutral	Neutral	Agree	Agree
420	Female	21-25	PG	1st Year	South India	INSIDE INDIA	Yes	Research articles		No	Yes	Patient assessment and monitoring through telehealth		Neutral	Agree	Agree	Neutral	Agree	Neutral	Agree	Agree	Neutral	Neutral	Disagree	Agree	Neutral	Agree	Agree	Agree	Neutral	Neutral	Agree	Neutral	Neutral	Agree	Disagree	Agree	Neutral	Disagree	Neutral	Neutral	Neutral	Agree	Neutral	Neutral	Disagree	Agree	Agree
421	Female	18-20	PG	2nd Year	South India	INSIDE INDIA	Yes	Social media		Yes	No		Prefer traditional in-person instruction	Neutral	Strongly Agree	Strongly Agree	Strongly Agree	Neutral	Strongly Agree	Strongly Agree	Agree	Neutral	Strongly Agree	Strongly Agree	Strongly Agree	Strongly Agree	Strongly Agree	Strongly Agree	Strongly Agree	Strongly Agree	Strongly Agree	Strongly Agree	Neutral	Strongly Agree	Neutral	Neutral	Strongly Agree	Strongly Agree	Strongly Agree	Neutral	Strongly Agree	Strongly Agree	Strongly Agree	Neutral	Neutral	Strongly Agree	Strongly Agree	Neutral
422	Male	21-25	PG	2nd Year	North India	INSIDE INDIA	Yes	Research articles		Yes	Yes	Patient assessment and monitoring through telehealth		Strongly Agree	Strongly Agree	Strongly Agree	Neutral	Strongly Agree	Strongly Agree	Neutral	Neutral	Strongly Agree	Neutral	Neutral	Strongly Agree	Strongly Agree	Neutral	Strongly Agree	Strongly Agree	Strongly Agree	Strongly Agree	Strongly Agree	Strongly Agree	Neutral	Strongly Agree	Strongly Agree	Strongly Agree	Neutral	Strongly Agree	Strongly Agree	Strongly Agree	Strongly Agree	Strongly Agree	Neutral	Strongly Agree	Strongly Agree	Strongly Agree	Strongly Agree
423	Female	21-25	UG	3rd Year	South India	INSIDE INDIA	No		Lack of exposure/information
424	Male	21-25	PG	1st Year	West India	INSIDE INDIA	Yes	Research articles		No	Yes	Patient assessment and monitoring through telehealth		Neutral	Neutral	Agree	Agree	Agree	Agree	Agree	Agree	Agree	Agree	Neutral	Agree	Agree	Agree	Strongly Agree	Agree	Neutral	Agree	Agree	Neutral	Agree	Agree	Agree	Neutral	Neutral	Agree	Agree	Neutral	Agree	Agree	Agree	Agree	Agree	Agree	Agree
425	Male	18-20	PG	2nd Year	South India	INSIDE INDIA	Yes	Academic courses		No	No		Prefer traditional in-person instruction	Agree	Neutral	Agree	Agree	Agree	Neutral	Neutral	Neutral	Neutral	Neutral	Neutral	Agree	Agree	Agree	Agree	Agree	Agree	Agree	Agree	Agree	Agree	Agree	Agree	Agree	Agree	Agree	Agree	Agree	Agree	Agree	Agree	Agree	Agree	Agree	Agree
426	Male	18-20	UG	3rd Year	South India	INSIDE INDIA	No		Lack of exposure/information
427	Female	21-25	PG	3rd Year	North India	INSIDE INDIA	Yes	Social media		No	Yes	Practical application of telerehabilitation techniques		Strongly Agree	Neutral	Strongly Agree	Neutral	Strongly Agree	Strongly Agree	Neutral	Agree	Strongly Agree	Strongly Agree	Strongly Agree	Neutral	Strongly Agree	Strongly Agree	Strongly Agree	Neutral	Strongly Agree	Strongly Agree	Strongly Agree	Strongly Agree	Strongly Agree	Strongly Agree	Strongly Agree	Strongly Agree	Strongly Agree	Strongly Agree	Neutral	Neutral	Strongly Agree	Neutral	Strongly Agree	Strongly Agree	Strongly Agree	Strongly Agree	Strongly Agree
428	Female	21-25	UG	4th Year	South India	INSIDE INDIA	No		Lack of exposure/information
429	Female	21-25	UG	4th Year	North East India	INSIDE INDIA	Yes	Social media		No	Yes	Patient assessment and monitoring through telehealth		Disagree	Agree	Disagree	Neutral	Disagree	Disagree	Neutral	Neutral	Disagree	Disagree	Disagree	Agree	Agree	Agree	Agree	Neutral	Disagree	Agree	Agree	Neutral	Agree	Agree	Agree	Neutral	Agree	Disagree	Agree	Agree	Agree	Agree	Neutral	Agree	Agree	Agree	Agree
430	Female	21-25	UG	4th Year	Central India	INSIDE INDIA	No		Lack of exposure/information
431	Male	21-25	PG	2nd Year	East India	INSIDE INDIA	Yes	Social media		No	Yes	Practical application of telerehabilitation techniques		Disagree	Disagree	Neutral	Agree	Disagree	Disagree	Neutral	Agree	Disagree	Neutral	Neutral	Agree	Neutral	Agree	Strongly Agree	Agree	Neutral	Agree	Agree	Agree	Agree	Agree	Neutral	Agree	Agree	Agree	Agree	Agree	Agree	Agree	Agree	Agree	Agree	Agree	Agree
432	Female	21-25	UG	Intern	North India	INSIDE INDIA	Yes	Social media		No	Yes	Practical application of telerehabilitation techniques		Neutral	Neutral	Neutral	Neutral	Neutral	Neutral	Neutral	Neutral	Neutral	Neutral	Neutral	Neutral	Neutral	Neutral	Strongly Agree	Neutral	Neutral	Neutral	Agree	Neutral	Neutral	Neutral	Neutral	Neutral	Neutral	Neutral	Neutral	Neutral	Neutral	Neutral	Neutral	Neutral	Neutral	Neutral	Neutral
433	Female	21-25	UG	2nd Year	North India	INSIDE INDIA	Yes	Academic courses		Yes	Yes	Patient assessment and monitoring through telehealth		Neutral	Neutral	Neutral	Neutral	Agree	Agree	Agree	Agree	Neutral	Agree	Neutral	Neutral	Neutral	Neutral	Strongly Agree	Neutral	Neutral	Neutral	Agree	Neutral	Neutral	Neutral	Agree	Agree	Agree	Agree	Agree	Agree	Agree	Agree	Agree	Agree	Agree	Agree	Agree
434	Male	21-25	UG	4th Year	East India	INSIDE INDIA	No		Lack of exposure/information
435	Female	21-25	UG	Intern	South India	INSIDE INDIA	Yes	Social media		No	Yes	Legal and ethical considerations		Neutral	Neutral	Agree	Neutral	Neutral	Disagree	Disagree	Agree	Agree	Agree	Disagree	Neutral	Neutral	Agree	Agree	Agree	Agree	Agree	Agree	Agree	Agree	Agree	Agree	Agree	Agree	Agree	Agree	Agree	Agree	Agree	Agree	Agree	Agree	Agree	Agree
436	Male	21-25	UG	4th Year	North India	INSIDE INDIA	Yes	Social media		Yes	Yes	Practical application of telerehabilitation techniques		Agree	Agree	Agree	Agree	Agree	Neutral	Neutral	Neutral	Agree	Agree	Neutral	Neutral	Neutral	Agree	Agree	Neutral	Neutral	Agree	Agree	Agree	Agree	Agree	Agree	Neutral	Neutral	Neutral	Neutral	Agree	Agree	Neutral	Agree	Agree	Agree	Agree	Agree
437	Female	>25	Ph.d.,	1st Year	Central India	INSIDE INDIA	Yes	Workshops or seminars		Yes	Yes	Understanding telecommunication technologies		Agree	Agree	Neutral	Agree	Agree	Neutral	Agree	Agree	Neutral	Neutral	Neutral	Agree	Neutral	Neutral	Agree	Neutral	Neutral	Neutral	Agree	Neutral	Neutral	Neutral	Agree	Agree	Agree	Neutral	Agree	Neutral	Neutral	Neutral	Neutral	Neutral	Neutral	Neutral	Neutral
438	Male	>25	Ph.d.,		North East India	INSIDE INDIA	Yes	Social media		No	Yes	Patient assessment and monitoring through telehealth		Strongly Agree	Neutral	Strongly Agree	Neutral	Neutral	Disagree	Strongly Agree	Neutral	Strongly Agree	Neutral	Disagree	Disagree	Strongly Agree	Strongly Agree	Strongly Agree	Strongly Agree	Disagree	Neutral	Strongly Agree	Strongly Agree	Strongly Agree	Disagree	Strongly Agree	Neutral	Strongly Agree	Neutral	Strongly Agree	Strongly Agree	Strongly Agree	Strongly Agree	Neutral	Strongly Agree	Strongly Agree	Strongly Agree	Strongly Agree
439	Male	21-25	UG	Intern	West India	INSIDE INDIA	No		Lack of exposure/information
440	Female	21-25	Ph.d.,		East India	INSIDE INDIA	Yes	Social media		No	Yes	Patient assessment and monitoring through telehealth		Neutral	Neutral	Agree	Agree	Disagree	Disagree	Disagree	Agree	Neutral	Agree	Neutral	Agree	Agree	Neutral	Strongly Agree	Agree	Disagree	Disagree	Agree	Neutral	Agree	Agree	Agree	Disagree	Agree	Agree	Agree	Agree	Agree	Agree	Neutral	Neutral	Neutral	Agree	Agree
441	Female	>25	Ph.d.,		South India	INSIDE INDIA	Yes	Research articles		No	Yes	Practical application of telerehabilitation techniques		Neutral	Agree	Agree	Agree	Disagree	Disagree	Neutral	Neutral	Neutral	Neutral	Neutral	Neutral	Disagree	Agree	Agree	Agree	Disagree	Neutral	Agree	Agree	Agree	Agree	Agree	Agree	Agree	Agree	Agree	Agree	Disagree	Neutral	Neutral	Neutral	Neutral	Agree	Neutral
442	Male	>25	UG	Intern	North East India	INSIDE INDIA	Yes	Social media		No	Yes	Patient assessment and monitoring through telehealth		Neutral	Neutral	Disagree	Strongly Agree	Strongly Agree	Strongly Agree	Strongly Agree	Agree	Neutral	Strongly Agree	Strongly Agree	Strongly Agree	Strongly Agree	Neutral	Disagree	Strongly Agree	Neutral	Neutral	Agree	Neutral	Neutral	Strongly Agree	Strongly Agree	Neutral	Strongly Agree	Neutral	Strongly Agree	Neutral	Neutral	Disagree	Strongly Agree	Strongly Agree	Strongly Agree	Strongly Agree	Strongly Agree
443	Male	21-25	UG	4th Year	North India	INSIDE INDIA	Yes	Social media		No	Yes	Understanding telecommunication technologies		Agree	Agree	Neutral	Agree	Agree	Agree	Agree	Agree	Agree	Agree	Agree	Agree	Neutral	Agree	Agree	Agree	Agree	Agree	Agree	Agree	Agree	Agree	Agree	Agree	Neutral	Agree	Agree	Agree	Agree	Agree	Neutral	Agree	Neutral	Agree	Agree
444	Male	21-25	UG	Intern	East India	INSIDE INDIA	Yes	Research articles		No	Yes	Patient assessment and monitoring through telehealth		Neutral	Agree	Agree	Agree	Disagree	Disagree	Agree	Agree	Disagree	Neutral	Neutral	Agree	Agree	Agree	Agree	Agree	Agree	Neutral	Agree	Agree	Agree	Neutral	Agree	Agree	Agree	Agree	Neutral	Agree	Neutral	Agree	Agree	Agree	Agree	Agree	Agree
445	Female	21-25	UG	Intern	West India	INSIDE INDIA	No		Lack of exposure/information
446	Female	>25	Ph.d.,	1st Year	Central India	INSIDE INDIA	Yes	Research articles		No	Yes	Practical application of telerehabilitation techniques		Neutral	Agree	Agree	Agree	Neutral	Neutral	Neutral	Agree	Neutral	Neutral	Disagree	Agree	Neutral	Agree	Strongly Disagree	Agree	Disagree	Neutral	Agree	Agree	Neutral	Neutral	Agree	Neutral	Neutral	Neutral	Agree	Neutral	Neutral	Agree	Neutral	Neutral	Agree	Agree	Agree
447	Male	21-25	PG	1st Year	South India	INSIDE INDIA	Yes	Research articles		No	Yes	Patient assessment and monitoring through telehealth		Agree	Agree	Agree	Agree	Agree	Agree	Agree	Agree	Agree	Agree	Agree	Agree	Agree	Agree	Agree	Agree	Agree	Agree	Agree	Agree	Agree	Agree	Agree	Agree	Agree	Agree	Agree	Agree	Agree	Neutral	Neutral	Agree	Neutral	Neutral	Agree
448	Female	18-20	UG	4th Year	North East India	INSIDE INDIA	Yes	Workshops or seminars		No	Yes	Patient assessment and monitoring through telehealth		Agree	Neutral	Neutral	Agree	Agree	Agree	Agree	Neutral	Agree	Agree	Neutral	Agree	Agree	Neutral	Strongly Disagree	Neutral	Neutral	Agree	Agree	Neutral	Neutral	Neutral	Neutral	Neutral	Neutral	Neutral	Neutral	Neutral	Neutral	Disagree	Neutral	Neutral	Neutral	Neutral	Neutral
449	Female	21-25	PG	2nd Year	West India	INSIDE INDIA	Yes	Research articles		Yes	Yes	Understanding telecommunication technologies		Neutral	Neutral	Disagree	Neutral	Agree	Agree	Agree	Neutral	Neutral	Neutral	Agree	Disagree	Neutral	Agree	Strongly Disagree	Neutral	Neutral	Neutral	Agree	Agree	Agree	Agree	Agree	Neutral	Agree	Agree	Agree	Agree	Neutral	Agree	Neutral	Neutral	Agree	Agree	Agree
450	Male	21-25	UG	Intern	Central India	INSIDE INDIA	No		Insufficient educational background
451	Male	21-25	UG	Intern	East India	INSIDE INDIA	No		Lack of exposure/information
452	Female	18-20	UG	4th Year	South India	INSIDE INDIA	Yes	Research articles		No	Yes	Legal and ethical considerations		Agree	Agree	Agree	Agree	Disagree	Disagree	Neutral	Neutral	Disagree	Agree	Agree	Agree	Neutral	Agree	Agree	Agree	Neutral	Agree	Agree	Agree	Agree	Agree	Agree	Agree	Neutral	Neutral	Agree	Agree	Agree	Agree	Neutral	Agree	Neutral	Agree	Agree
453	Female	21-25	PG	2nd Year	West India	INSIDE INDIA	Yes	Social media		No	Yes	Patient assessment and monitoring through telehealth		Agree	Agree	Disagree	Disagree	Agree	Disagree	Disagree	Agree	Agree	Agree	Disagree	Neutral	Agree	Agree	Strongly Disagree	Agree	Disagree	Disagree	Agree	Disagree	Agree	Agree	Agree	Disagree	Agree	Disagree	Agree	Neutral	Agree	Agree	Neutral	Agree	Disagree	Agree	Agree
454	Male	21-25	UG	Intern	East India	INSIDE INDIA	Yes	Research articles		No	Yes	Patient assessment and monitoring through telehealth		Strongly Agree	Strongly Agree	Neutral	Neutral	Strongly Agree	Strongly Agree	Strongly Agree	Agree	Neutral	Neutral	Neutral	Neutral	Strongly Agree	Strongly Agree	Strongly Disagree	Neutral	Disagree	Neutral	Agree	Strongly Agree	Strongly Agree	Strongly Agree	Strongly Agree	Neutral	Strongly Agree	Neutral	Strongly Agree	Neutral	Neutral	Neutral	Neutral	Neutral	Strongly Agree	Strongly Agree	Strongly Agree
455	Male	21-25	PG	1st Year	South India	INSIDE INDIA	No		Lack of exposure/information
456	Female	>25	Ph.d.,		North India	INSIDE INDIA	Yes	Research articles		No	Yes	Patient assessment and monitoring through telehealth		Strongly Agree	Strongly Agree	Strongly Agree	Strongly Agree	Strongly Agree	Strongly Agree	Strongly Agree	Agree	Strongly Agree	Neutral	Strongly Agree	Strongly Agree	Strongly Agree	Strongly Agree	Strongly Agree	Strongly Agree	Strongly Agree	Strongly Agree	Strongly Agree	Strongly Agree	Strongly Agree	Strongly Agree	Strongly Agree	Strongly Agree	Strongly Agree	Strongly Agree	Strongly Agree	Strongly Agree	Strongly Agree	Strongly Agree	Strongly Agree	Strongly Agree	Strongly Agree	Strongly Agree	Strongly Agree
457	Female	>25	UG	Intern	North India	INSIDE INDIA	Yes	Social media		No	Yes	Patient assessment and monitoring through telehealth		Agree	Agree	Neutral	Agree	Agree	Disagree	Disagree	Agree	Agree	Agree	Agree	Agree	Agree	Agree	Agree	Agree	Neutral	Agree	Agree	Agree	Agree	Agree	Agree	Agree	Agree	Neutral	Agree	Agree	Agree	Agree	Agree	Neutral	Neutral	Agree	Agree
458	Male	21-25	UG	3rd Year	East India	INSIDE INDIA	No		Limited interest in healthcare topics
459	Male	18-20	UG	3rd Year	West India	INSIDE INDIA	No		Limited interest in healthcare topics
460	Male	21-25	UG	3rd Year	Central India	INSIDE INDIA	No		Insufficient educational background
461	Male	21-25	UG	3rd Year	East India	INSIDE INDIA	No		Lack of exposure/information
462	Male	18-20	UG	Intern	South India	INSIDE INDIA	Yes	Social media		Yes	Yes	Understanding telecommunication technologies		Strongly Agree	Strongly Agree	Strongly Agree	Strongly Agree	Strongly Agree	Strongly Agree	Strongly Agree	Agree	Strongly Agree	Strongly Agree	Strongly Agree	Strongly Agree	Strongly Agree	Strongly Agree	Strongly Agree	Strongly Agree	Strongly Agree	Strongly Agree	Strongly Agree	Strongly Agree	Strongly Agree	Strongly Agree	Strongly Agree	Strongly Agree	Strongly Agree	Strongly Agree	Strongly Agree	Strongly Agree	Strongly Agree	Strongly Agree	Strongly Agree	Strongly Agree	Strongly Agree	Strongly Agree	Strongly Agree
463	Male	21-25	UG	3rd Year	North India	INSIDE INDIA	No		Insufficient educational background
464	Female	18-20	UG	2nd Year	East India	INSIDE INDIA	No		Lack of exposure/information
465	Female	18-20	UG	2nd Year	North East India	INSIDE INDIA	No		Lack of exposure/information
466	Male	>25	Ph.d.,		Central India	INSIDE INDIA	Yes	Research articles		Yes	No		Lack of time or resources	Agree	Agree	Neutral	Agree	Neutral	Agree	Agree	Neutral	Neutral	Neutral	Neutral	Neutral	Neutral	Neutral	Neutral	Neutral	Neutral	Neutral	Agree	Neutral	Neutral	Neutral	Agree	Agree	Agree	Agree	Agree	Neutral	Neutral	Neutral	Neutral	Neutral	Neutral	Agree	Neutral
467	Male	21-25	UG	3rd Year	Southeast Asia	OUTSIDE INDIA	Yes	Social media		No	Yes	Practical application of telerehabilitation techniques		Agree	Agree	Agree	Agree	Agree	Agree	Agree	Agree	Agree	Agree	Agree	Agree	Agree	Agree	Agree	Agree	Agree	Agree	Agree	Agree	Agree	Agree	Agree	Agree	Agree	Agree	Agree	Agree	Agree	Agree	Agree	Agree	Agree	Agree	Agree
468	Female	>25	PG	2nd Year	Southeast Asia	OUTSIDE INDIA	Yes	Workshops or seminars		No	Yes	Patient assessment and monitoring through telehealth		Agree	Agree	Neutral	Neutral	Disagree	Disagree	Agree	Agree	Disagree	Agree	Neutral	Agree	Agree	Neutral	Agree	Agree	Disagree	Disagree	Agree	Disagree	Agree	Disagree	Agree	Neutral	Neutral	Disagree	Agree	Disagree	Agree	Agree	Neutral	Agree	Agree	Agree	Agree
469	Female	21-25	PG	2nd Year	North India	INSIDE INDIA	Yes	Research articles		No	Yes	Understanding telecommunication technologies		Strongly Agree	Strongly Agree	Strongly Agree	Disagree	Disagree	Neutral	Strongly Agree	Neutral	Neutral	Strongly Agree	Strongly Agree	Neutral	Disagree	Strongly Agree	Strongly Agree	Strongly Agree	Neutral	Neutral	Agree	Disagree	Strongly Agree	Strongly Agree	Strongly Agree	Neutral	Strongly Agree	Strongly Agree	Strongly Agree	Strongly Agree	Strongly Agree	Strongly Agree	Strongly Agree	Strongly Agree	Strongly Agree	Strongly Agree	Strongly Agree
470	Male	18-20	UG	3rd Year	East India	INSIDE INDIA	No		Lack of exposure/information
471	Female	>25	UG	Intern	Middle East	OUTSIDE INDIA	Yes	Social media		Yes	Yes	Understanding telecommunication technologies		Strongly Agree	Strongly Agree	Strongly Agree	Strongly Agree	Strongly Agree	Strongly Agree	Strongly Agree	Strongly Agree	Strongly Agree	Strongly Agree	Strongly Agree	Strongly Agree	Strongly Agree	Strongly Agree	Strongly Agree	Neutral	Strongly Agree	Strongly Agree	Strongly Agree	Strongly Agree	Strongly Agree	Neutral	Strongly Agree	Neutral	Strongly Agree	Strongly Agree	Strongly Agree	Strongly Agree	Strongly Agree	Neutral	Neutral	Neutral	Neutral	Strongly Agree	Strongly Agree
472	Female	21-25	UG	Intern	Oceania	OUTSIDE INDIA	Yes	Workshops or seminars		No	No		Not relevant to my career goals	Neutral	Agree	Agree	Neutral	Disagree	Neutral	Agree	Neutral	Neutral	Neutral	Neutral	Neutral	Neutral	Neutral	Neutral	Neutral	Neutral	Neutral	Agree	Neutral	Neutral	Neutral	Neutral	Neutral	Neutral	Neutral	Neutral	Neutral	Neutral	Neutral	Neutral	Neutral	Neutral	Neutral	Neutral
473	Male	>25	PG	4th Year	Southeast Asia	OUTSIDE INDIA	Yes	Research articles		Yes	Yes	Practical application of telerehabilitation techniques		Agree	Neutral	Agree	Agree	Neutral	Agree	Agree	Agree	Agree	Agree	Agree	Agree	Agree	Agree	Agree	Agree	Agree	Agree	Agree	Agree	Agree	Agree	Agree	Agree	Neutral	Agree	Agree	Agree	Agree	Agree	Agree	Neutral	Agree	Agree	Agree
474	Female	21-25	UG	Intern	North India	INSIDE INDIA	Yes	Research articles		No	Yes	Patient assessment and monitoring through telehealth		Neutral	Agree	Agree	Agree	Neutral	Disagree	Agree	Agree	Neutral	Agree	Agree	Agree	Agree	Agree	Agree	Agree	Neutral	Agree	Agree	Agree	Agree	Agree	Agree	Agree	Agree	Agree	Agree	Agree	Agree	Agree	Agree	Agree	Agree	Agree	Agree
475	Male	>25	UG	Intern	East India	INSIDE INDIA	Yes	Workshops or seminars		Yes	Yes	Practical application of telerehabilitation techniques		Strongly Agree	Neutral	Strongly Agree	Strongly Agree	Strongly Agree	Strongly Agree	Strongly Agree	Strongly Agree	Strongly Agree	Strongly Agree	Strongly Agree	Strongly Agree	Strongly Agree	Strongly Agree	Strongly Agree	Strongly Agree	Strongly Agree	Strongly Agree	Strongly Agree	Strongly Agree	Strongly Agree	Strongly Agree	Strongly Agree	Strongly Agree	Strongly Agree	Strongly Agree	Strongly Agree	Strongly Agree	Strongly Agree	Strongly Agree	Strongly Agree	Strongly Agree	Strongly Agree	Strongly Agree	Strongly Agree
476	Female	21-25	UG	Intern	South India	INSIDE INDIA	No		Limited interest in healthcare topics
477	Male	21-25	UG	4th Year	South Asia	OUTSIDE INDIA	Yes	Research articles		No	Yes	Practical application of telerehabilitation techniques		Agree	Agree	Disagree	Agree	Neutral	Agree	Agree	Agree	Agree	Agree	Neutral	Agree	Agree	Agree	Agree	Agree	Disagree	Agree	Agree	Agree	Agree	Agree	Agree	Agree	Agree	Agree	Agree	Agree	Agree	Agree	Agree	Agree	Agree	Agree	Agree
478	Female	21-25	UG	Intern	North India	INSIDE INDIA	No		Lack of exposure/information
479	Female	21-25	UG	4th Year	Southeast Asia	OUTSIDE INDIA	No		Lack of exposure/information
480	Female	>25	PG	2nd Year	Middle East	OUTSIDE INDIA	Yes	Workshops or seminars		No	No		Prefer traditional in-person instruction	Agree	Agree	Agree	Agree	Neutral	Neutral	Neutral	Neutral	Neutral	Agree	Disagree	Neutral	Neutral	Neutral	Agree	Agree	Agree	Neutral	Agree	Neutral	Neutral	Neutral	Neutral	Neutral	Agree	Agree	Neutral	Neutral	Neutral	Neutral	Neutral	Neutral	Neutral	Neutral	Neutral
481	Female	21-25	UG	Intern	North India	INSIDE INDIA	Yes	Social media		Yes	Yes	Patient assessment and monitoring through telehealth		Agree	Agree	Agree	Agree	Agree	Neutral	Agree	Agree	Agree	Agree	Agree	Agree	Agree	Agree	Agree	Agree	Agree	Agree	Agree	Agree	Agree	Agree	Agree	Agree	Agree	Agree	Agree	Agree	Agree	Agree	Agree	Agree	Agree	Agree	Agree
482	Female	21-25	UG	2nd Year	North East India	INSIDE INDIA	No		Lack of exposure/information
483	Female	21-25	UG	Intern	South India	INSIDE INDIA	Yes	Social media		No	Yes	Practical application of telerehabilitation techniques		Strongly Agree	Strongly Agree	Strongly Agree	Strongly Agree	Strongly Agree	Strongly Agree	Strongly Agree	Strongly Agree	Strongly Agree	Strongly Agree	Strongly Agree	Strongly Agree	Strongly Agree	Strongly Agree	Strongly Agree	Strongly Agree	Strongly Agree	Strongly Agree	Strongly Agree	Strongly Agree	Strongly Agree	Strongly Agree	Strongly Agree	Strongly Agree	Strongly Agree	Strongly Agree	Strongly Agree	Strongly Agree	Strongly Agree	Strongly Agree	Strongly Agree	Strongly Agree	Strongly Agree	Strongly Agree	Strongly Agree
484	Female	>25	Ph.d.,		West India	INSIDE INDIA	Yes	Research articles		No	Yes	Understanding telecommunication technologies		Strongly Agree	Strongly Agree	Strongly Agree	Strongly Agree	Neutral	Neutral	Strongly Agree	Strongly Agree	Strongly Agree	Neutral	Strongly Agree	Neutral	Strongly Agree	Strongly Agree	Strongly Agree	Strongly Agree	Neutral	Strongly Agree	Strongly Agree	Strongly Agree	Strongly Agree	Neutral	Strongly Agree	Neutral	Strongly Agree	Strongly Agree	Strongly Agree	Strongly Agree	Strongly Agree	Strongly Agree	Strongly Agree	Strongly Agree	Strongly Agree	Strongly Agree	Strongly Agree
485	Male	21-25	UG	Intern	South India	INSIDE INDIA	Yes	Research articles		Yes	Yes	Practical application of telerehabilitation techniques		Strongly Agree	Strongly Agree	Neutral	Strongly Agree	Disagree	Neutral	Strongly Agree	Strongly Agree	Neutral	Strongly Agree	Strongly Agree	Neutral	Strongly Agree	Strongly Agree	Neutral	Strongly Agree	Neutral	Neutral	Strongly Agree	Strongly Agree	Strongly Agree	Neutral	Neutral	Neutral	Strongly Agree	Disagree	Strongly Agree	Neutral	Strongly Agree	Strongly Agree	Disagree	Strongly Agree	Strongly Agree	Strongly Agree	Strongly Agree
486	Female	21-25	UG	Intern	South India	INSIDE INDIA	Yes	Research articles		Yes	Yes	Patient assessment and monitoring through telehealth		Strongly Agree	Strongly Agree	Neutral	Neutral	Strongly Agree	Strongly Agree	Strongly Agree	Neutral	Strongly Agree	Strongly Agree	Strongly Agree	Neutral	Neutral	Strongly Agree	Strongly Agree	Strongly Agree	Neutral	Disagree	Disagree	Neutral	Disagree	Strongly Agree	Neutral	Strongly Agree	Strongly Agree	Strongly Agree	Strongly Agree	Neutral	Neutral	Disagree	Neutral	Neutral	Neutral	Strongly Agree	Strongly Agree
487	Female	18-20	UG	Intern	South India	INSIDE INDIA	Yes	Research articles		No	Yes	Practical application of telerehabilitation techniques		Neutral	Strongly Agree	Neutral	Neutral	Neutral	Neutral	Strongly Agree	Strongly Agree	Strongly Agree	Strongly Agree	Neutral	Neutral	Neutral	Neutral	Strongly Agree	Neutral	Disagree	Neutral	Agree	Neutral	Neutral	Strongly Agree	Neutral	Neutral	Strongly Agree	Neutral	Neutral	Neutral	Strongly Agree	Strongly Agree	Neutral	Strongly Agree	Strongly Agree	Strongly Agree	Strongly Agree
488	Female	21-25	UG	Intern	South India	INSIDE INDIA	Yes	Research articles		No	Yes	Patient assessment and monitoring through telehealth		Neutral	Strongly Agree	Strongly Agree	Strongly Agree	Neutral	Neutral	Neutral	Strongly Agree	Neutral	Strongly Agree	Strongly Agree	Neutral	Neutral	Strongly Agree	Neutral	Neutral	Neutral	Neutral	Strongly Agree	Neutral	Neutral	Neutral	Strongly Agree	Neutral	Strongly Agree	Strongly Agree	Strongly Agree	Strongly Agree	Strongly Agree	Neutral	Neutral	Strongly Agree	Strongly Agree	Strongly Agree	Strongly Agree
489	Female	21-25	UG	Intern	South India	INSIDE INDIA	Yes	Academic courses		No	Yes	Practical application of telerehabilitation techniques		Disagree	Strongly Agree	Neutral	Strongly Agree	Strongly Agree	Neutral	Strongly Agree	Neutral	Strongly Agree	Strongly Agree	Neutral	Strongly Agree	Neutral	Neutral	Strongly Agree	Neutral	Strongly Agree	Strongly Agree	Disagree	Strongly Agree	Strongly Agree	Neutral	Strongly Agree	Neutral	Strongly Agree	Neutral	Strongly Agree	Neutral	Strongly Agree	Strongly Agree	Neutral	Strongly Agree	Strongly Agree	Strongly Agree	Strongly Agree
490	Female	21-25	UG	Intern	North East India	INSIDE INDIA	Yes	Academic courses		No	Yes	Practical application of telerehabilitation techniques		Neutral	Strongly Agree	Strongly Agree	Strongly Agree	Neutral	Neutral	Strongly Agree	Strongly Agree	Neutral	Strongly Agree	Neutral	Strongly Agree	Neutral	Neutral	Strongly Agree	Neutral	Strongly Agree	Strongly Agree	Agree	Neutral	Neutral	Strongly Agree	Neutral	Strongly Agree	Neutral	Strongly Agree	Strongly Agree	Neutral	Strongly Agree	Neutral	Strongly Agree	Neutral	Strongly Agree	Neutral	Neutral
491	Male	>25	Ph.d.,		West India	INSIDE INDIA	Yes	Research articles		No	Yes	Legal and ethical considerations		Disagree	Strongly Agree	Strongly Agree	Strongly Agree	Disagree	Neutral	Strongly Agree	Strongly Agree	Strongly Agree	Strongly Agree	Disagree	Strongly Agree	Strongly Agree	Strongly Agree	Neutral	Strongly Agree	Disagree	Neutral	Agree	Strongly Agree	Strongly Agree	Strongly Agree	Strongly Agree	Strongly Agree	Strongly Agree	Neutral	Strongly Agree	Strongly Agree	Neutral	Strongly Agree	Neutral	Strongly Agree	Strongly Agree	Strongly Agree	Strongly Agree
492	Female	21-25	UG	Intern	North East India	INSIDE INDIA	Yes	Social media		No	Yes	Patient assessment and monitoring through telehealth		Neutral	Strongly Agree	Neutral	Strongly Agree	Neutral	Neutral	Neutral	Strongly Agree	Disagree	Strongly Agree	Neutral	Neutral	Neutral	Neutral	Strongly Agree	Strongly Agree	Strongly Agree	Strongly Agree	Strongly Agree	Strongly Agree	Neutral	Neutral	Strongly Agree	Strongly Agree	Strongly Agree	Neutral	Neutral	Neutral	Strongly Agree	Strongly Agree	Strongly Agree	Neutral	Neutral	Strongly Agree	Neutral
493	Male	18-20	UG	3rd Year	South India	INSIDE INDIA	Yes	Workshops or seminars		Yes	Yes	Understanding telecommunication technologies		Strongly Agree	Strongly Agree	Strongly Agree	Strongly Agree	Strongly Agree	Strongly Agree	Strongly Agree	Strongly Agree	Strongly Agree	Strongly Agree	Strongly Agree	Strongly Agree	Strongly Agree	Strongly Agree	Strongly Agree	Strongly Agree	Strongly Agree	Strongly Agree	Strongly Agree	Strongly Agree	Strongly Agree	Strongly Agree	Strongly Agree	Strongly Agree	Strongly Agree	Strongly Agree	Strongly Agree	Strongly Agree	Strongly Agree	Strongly Agree	Strongly Agree	Strongly Agree	Strongly Agree	Strongly Agree	Strongly Agree
494	Female	21-25	UG	4th Year	West India	INSIDE INDIA	No		Limited interest in healthcare topics
495	Male	21-25	UG	Intern	East India	INSIDE INDIA	No		Limited interest in healthcare topics
496	Female	21-25	UG	3rd Year	North East India	INSIDE INDIA	Yes	Workshops or seminars		No	Yes	Practical application of telerehabilitation techniques		Neutral	Neutral	Neutral	Neutral	Neutral	Neutral	Neutral	Neutral	Neutral	Neutral	Neutral	Neutral	Neutral	Neutral	Neutral	Neutral	Neutral	Neutral	Agree	Neutral	Neutral	Neutral	Neutral	Neutral	Neutral	Neutral	Neutral	Neutral	Neutral	Neutral	Neutral	Neutral	Neutral	Neutral	Neutral
497	Male	21-25	UG	3rd Year	Southeast Asia	OUTSIDE INDIA	No		Others
498	Female	>25	UG	Intern	South Asia	OUTSIDE INDIA	Yes	Social media		No	Yes	Practical application of telerehabilitation techniques		Strongly Agree	Strongly Agree	Strongly Agree	Strongly Agree	Strongly Agree	Strongly Agree	Disagree	Strongly Agree	Strongly Agree	Strongly Agree	Strongly Agree	Strongly Agree	Strongly Agree	Strongly Agree	Strongly Agree	Strongly Agree	Neutral	Strongly Agree	Strongly Agree	Strongly Agree	Strongly Agree	Strongly Agree	Strongly Agree	Strongly Agree	Strongly Agree	Strongly Agree	Strongly Agree	Strongly Agree	Strongly Agree	Strongly Agree	Strongly Agree	Strongly Agree	Strongly Agree	Strongly Agree	Strongly Agree
499	Female	21-25	UG	3rd Year	Southeast Asia	OUTSIDE INDIA	Yes	Workshops or seminars		Yes	Yes	Patient assessment and monitoring through telehealth		Strongly Agree	Strongly Agree	Strongly Agree	Strongly Agree	Strongly Agree	Strongly Agree	Strongly Agree	Strongly Agree	Neutral	Strongly Agree	Strongly Agree	Strongly Agree	Strongly Agree	Disagree	Neutral	Neutral	Neutral	Disagree	Strongly Agree	Strongly Agree	Strongly Agree	Strongly Agree	Strongly Agree	Strongly Agree	Neutral	Neutral	Strongly Agree	Strongly Agree	Neutral	Strongly Agree	Disagree	Neutral	Strongly Agree	Disagree	Neutral
500	Female	21-25	UG	Intern	Southeast Asia	OUTSIDE INDIA	Yes	Workshops or seminars		No	Yes	Patient assessment and monitoring through telehealth		Strongly Agree	Strongly Agree	Strongly Agree	Strongly Agree	Strongly Agree	Strongly Agree	Strongly Agree	Strongly Agree	Strongly Agree	Strongly Agree	Strongly Agree	Strongly Agree	Neutral	Strongly Agree	Strongly Agree	Neutral	Strongly Agree	Strongly Agree	Agree	Strongly Agree	Neutral	Strongly Agree	Neutral	Strongly Agree	Neutral	Strongly Agree	Neutral	Strongly Agree	Strongly Agree	Neutral	Strongly Agree	Neutral	Strongly Agree	Neutral	Strongly Agree
501	Female	21-25	UG	4th Year	Middle East	OUTSIDE INDIA	Yes	Social media		No	Yes	Patient assessment and monitoring through telehealth		Neutral	Neutral	Neutral	Neutral	Neutral	Neutral	Neutral	Neutral	Neutral	Neutral	Neutral	Neutral	Neutral	Neutral	Neutral	Neutral	Neutral	Neutral	Agree	Neutral	Neutral	Neutral	Neutral	Neutral	Neutral	Neutral	Neutral	Neutral	Neutral	Neutral	Neutral	Neutral	Neutral	Neutral	Neutral
502	Female	18-20	UG	2nd Year	Oceania	OUTSIDE INDIA	No		Others
503	Male	21-25	UG	Intern	Southeast Asia	OUTSIDE INDIA	Yes	Academic courses		No	Yes	Patient assessment and monitoring through telehealth		Strongly Agree	Strongly Agree	Neutral	Neutral	Neutral	Disagree	Neutral	Strongly Agree	Disagree	Neutral	Disagree	Strongly Agree	Strongly Agree	Strongly Agree	Strongly Agree	Strongly Agree	Neutral	Strongly Agree	Strongly Agree	Strongly Agree	Strongly Agree	Strongly Agree	Strongly Agree	Strongly Agree	Strongly Agree	Strongly Agree	Strongly Agree	Strongly Agree	Strongly Agree	Strongly Agree	Strongly Agree	Strongly Agree	Strongly Agree	Strongly Agree	Strongly Agree
504	Female	21-25	UG	4th Year	Southeast Asia	OUTSIDE INDIA	No		Lack of exposure/information
505	Female	>25	Ph.d.,		South India	INSIDE INDIA	Yes	Research articles		No	Yes	Understanding telecommunication technologies		Strongly Disagree	Strongly Agree	Strongly Agree	Strongly Agree	Strongly Disagree	Strongly Disagree	Strongly Agree	Strongly Agree	Strongly Agree	Strongly Disagree	Strongly Agree	Strongly Agree	Strongly Agree	Strongly Agree	Strongly Agree	Strongly Agree	Strongly Agree	Strongly Agree	Strongly Agree	Strongly Agree	Strongly Agree	Strongly Agree	Strongly Agree	Strongly Agree	Neutral	Neutral	Strongly Agree	Strongly Agree	Strongly Agree	Strongly Agree	Strongly Agree	Strongly Agree	Strongly Agree	Strongly Agree	Strongly Agree
506	Female	18-20	UG	3rd Year	South India	INSIDE INDIA	Yes	Research articles		No	No		Prefer traditional in-person instruction	Neutral	Neutral	Neutral	Neutral	Strongly Disagree	Neutral	Neutral	Strongly Agree	Neutral	Neutral	Neutral	Neutral	Neutral	Neutral	Neutral	Strongly Disagree	Strongly Disagree	Neutral	Agree	Neutral	Neutral	Neutral	Neutral	Neutral	Neutral	Neutral	Neutral	Neutral	Neutral	Neutral	Neutral	Neutral	Strongly Disagree	Neutral	Neutral
507	Female	>25	Ph.d.,		East India	INSIDE INDIA	Yes	Research articles		Yes	Yes	Practical application of telerehabilitation techniques		Strongly Agree	Strongly Agree	Strongly Agree	Strongly Agree	Strongly Agree	Strongly Agree	Strongly Agree	Strongly Agree	Strongly Agree	Strongly Agree	Strongly Agree	Strongly Agree	Strongly Agree	Strongly Agree	Strongly Agree	Strongly Agree	Strongly Agree	Strongly Agree	Strongly Agree	Strongly Agree	Strongly Agree	Strongly Agree	Strongly Agree	Strongly Agree	Strongly Agree	Strongly Agree	Strongly Agree	Strongly Agree	Strongly Agree	Strongly Agree	Strongly Agree	Neutral	Neutral	Neutral	Strongly Agree
508	Male	21-25	UG	Intern	North East India	INSIDE INDIA	Yes	Research articles		No	Yes	Patient assessment and monitoring through telehealth		Neutral	Neutral	Neutral	Strongly Agree	Strongly Agree	Strongly Disagree	Strongly Agree	Strongly Agree	Strongly Agree	Strongly Agree	Strongly Agree	Strongly Agree	Strongly Disagree	Strongly Agree	Strongly Agree	Strongly Agree	Neutral	Strongly Agree	Strongly Agree	Strongly Agree	Strongly Agree	Strongly Agree	Strongly Agree	Strongly Agree	Strongly Agree	Strongly Agree	Strongly Agree	Strongly Agree	Strongly Agree	Strongly Agree	Strongly Agree	Neutral	Strongly Agree	Strongly Agree	Strongly Agree
509	Female	18-20	UG	3rd Year	South India	INSIDE INDIA	No		Lack of exposure/information
510	Female	18-20	UG	3rd Year	South India	INSIDE INDIA	No		Limited interest in healthcare topics
511	Female	21-25	PG	2nd Year	Central India	INSIDE INDIA	Yes	Social media		No	Yes	Practical application of telerehabilitation techniques		Strongly Agree	Neutral	Neutral	Strongly Agree	Neutral	Disagree	Strongly Agree	Strongly Agree	Neutral	Strongly Agree	Disagree	Neutral	Neutral	Strongly Agree	Strongly Agree	Strongly Agree	Strongly Agree	Strongly Agree	Strongly Agree	Strongly Agree	Strongly Agree	Strongly Agree	Strongly Agree	Strongly Agree	Strongly Agree	Strongly Agree	Strongly Agree	Strongly Agree	Strongly Agree	Strongly Agree	Strongly Agree	Strongly Agree	Strongly Agree	Strongly Agree	Strongly Agree
512	Male	21-25	UG	4th Year	North East India	INSIDE INDIA	No		Lack of exposure/information
513	Female	21-25	UG	Intern	East India	INSIDE INDIA	Yes	Research articles		No	Yes	Patient assessment and monitoring through telehealth		Neutral	Strongly Agree	Neutral	Neutral	Disagree	Strongly Agree	Strongly Agree	Strongly Agree	Strongly Agree	Neutral	Neutral	Neutral	Strongly Agree	Neutral	Neutral	Strongly Agree	Neutral	Strongly Agree	Strongly Agree	Neutral	Neutral	Strongly Agree	Neutral	Strongly Agree	Neutral	Strongly Agree	Neutral	Neutral	Neutral	Neutral	Neutral	Neutral	Neutral	Neutral	Neutral
514	Female	21-25	PG	2nd Year	West India	INSIDE INDIA	Yes	Academic courses		Yes	No		Prefer traditional in-person instruction	Strongly Agree	Strongly Agree	Strongly Agree	Strongly Agree	Strongly Agree	Strongly Agree	Strongly Agree	Strongly Agree	Strongly Agree	Strongly Agree	Strongly Agree	Strongly Agree	Strongly Agree	Strongly Agree	Strongly Agree	Strongly Agree	Neutral	Strongly Agree	Strongly Agree	Strongly Agree	Strongly Agree	Strongly Agree	Strongly Agree	Strongly Agree	Strongly Agree	Strongly Agree	Strongly Agree	Strongly Agree	Strongly Agree	Strongly Agree	Strongly Agree	Strongly Agree	Strongly Agree	Strongly Agree	Strongly Agree
515	Female	18-20	UG	1st Year	East India	INSIDE INDIA	No		Limited interest in healthcare topics
516	Male	21-25	UG	3rd Year	South India	INSIDE INDIA	No		Limited interest in healthcare topics
517	Female	21-25	PG	2nd Year	West India	INSIDE INDIA	Yes	Social media		Yes	Yes	Patient assessment and monitoring through telehealth		Strongly Agree	Strongly Disagree	Strongly Disagree	Strongly Disagree	Strongly Disagree	Strongly Disagree	Neutral	Strongly Agree	Strongly Agree	Strongly Agree	Strongly Disagree	Strongly Disagree	Strongly Disagree	Strongly Agree	Strongly Agree	Strongly Agree	Strongly Agree	Strongly Agree	Strongly Agree	Strongly Agree	Strongly Agree	Strongly Agree	Strongly Disagree	Strongly Disagree	Strongly Agree	Strongly Agree	Strongly Agree	Strongly Agree	Strongly Agree	Strongly Agree	Strongly Agree	Strongly Agree	Strongly Agree	Strongly Agree	Strongly Agree
518	Female	21-25	PG	2nd Year	East India	INSIDE INDIA	Yes	Social media		No	Yes	Patient assessment and monitoring through telehealth		Strongly Agree	Strongly Agree	Strongly Agree	Neutral	Neutral	Neutral	Strongly Agree	Neutral	Neutral	Neutral	Neutral	Neutral	Neutral	Neutral	Strongly Agree	Neutral	Strongly Disagree	Strongly Disagree	Agree	Neutral	Neutral	Neutral	Strongly Agree	Strongly Disagree	Neutral	Neutral	Strongly Agree	Neutral	Strongly Agree	Neutral	Neutral	Neutral	Neutral	Neutral	Neutral
519	Female	21-25	PG	2nd Year	South India	INSIDE INDIA	Yes	Social media		No	Yes	Legal and ethical considerations		Neutral	Strongly Agree	Strongly Agree	Strongly Agree	Neutral	Neutral	Neutral	Strongly Agree	Neutral	Neutral	Neutral	Neutral	Strongly Agree	Strongly Agree	Strongly Agree	Strongly Agree	Neutral	Strongly Agree	Strongly Agree	Neutral	Strongly Agree	Strongly Agree	Strongly Agree	Strongly Agree	Neutral	Strongly Agree	Strongly Agree	Neutral	Strongly Agree	Strongly Agree	Neutral	Strongly Agree	Strongly Agree	Strongly Agree	Neutral
520	Female	21-25	PG	2nd Year	West India	INSIDE INDIA	Yes	Research articles		Yes	Yes	Patient assessment and monitoring through telehealth		Neutral	Strongly Agree	Strongly Agree	Strongly Agree	Strongly Agree	Strongly Agree	Strongly Agree	Strongly Agree	Strongly Agree	Neutral	Neutral	Strongly Agree	Strongly Agree	Strongly Agree	Neutral	Neutral	Strongly Agree	Strongly Agree	Strongly Agree	Neutral	Strongly Agree	Neutral	Strongly Disagree	Strongly Agree	Strongly Agree	Strongly Agree	Strongly Agree	Strongly Agree	Strongly Agree	Strongly Agree	Strongly Agree	Strongly Agree	Strongly Agree	Strongly Agree	Strongly Agree
521	Male	21-25	UG	Intern	North East India	INSIDE INDIA	Yes	Academic courses		No	Yes	Practical application of telerehabilitation techniques		Neutral	Neutral	Strongly Agree	Strongly Disagree	Strongly Disagree	Strongly Disagree	Strongly Agree	Neutral	Strongly Disagree	Neutral	Strongly Disagree	Neutral	Strongly Agree	Strongly Agree	Neutral	Neutral	Neutral	Neutral	Agree	Strongly Agree	Neutral	Neutral	Neutral	Neutral	Strongly Agree	Strongly Agree	Strongly Agree	Strongly Agree	Strongly Agree	Strongly Agree	Strongly Agree	Neutral	Strongly Agree	Strongly Agree	Strongly Agree
522	Female	21-25	UG	4th Year	Southeast Asia	OUTSIDE INDIA	No		Lack of exposure/information
523	Male	>25	UG	Intern	South India	INSIDE INDIA	Yes	Social media		Yes	Yes	Patient assessment and monitoring through telehealth		Strongly Agree	Strongly Agree	Strongly Agree	Strongly Agree	Strongly Agree	Strongly Agree	Neutral	Strongly Agree	Strongly Agree	Strongly Agree	Neutral	Neutral	Strongly Agree	Strongly Agree	Strongly Agree	Strongly Agree	Strongly Agree	Strongly Agree	Agree	Strongly Agree	Strongly Agree	Neutral	Strongly Agree	Strongly Agree	Strongly Agree	Strongly Agree	Strongly Agree	Strongly Agree	Strongly Agree	Strongly Agree	Strongly Agree	Strongly Agree	Strongly Agree	Strongly Agree	Strongly Agree
523	Male	>25	UG	Intern	Central India	INSIDE INDIA	Yes	Social media		Yes	Yes	Patient assessment and monitoring through telehealth		Strongly Agree	Strongly Agree	Strongly Agree	Strongly Agree	Strongly Agree	Strongly Agree	Neutral	Strongly Agree	Strongly Agree	Strongly Agree	Neutral	Neutral	Strongly Agree	Strongly Agree	Strongly Agree	Strongly Agree	Strongly Agree	Strongly Agree	Agree	Strongly Agree	Strongly Agree	Neutral	Strongly Agree	Strongly Agree	Strongly Agree	Strongly Agree	Strongly Agree	Strongly Agree	Strongly Agree	Strongly Agree	Strongly Agree	Strongly Agree	Strongly Agree	Strongly Agree	Strongly Agree
